# Supplementary material
Source: publisher figshare collection journal article supplement (https://acs.figshare.com/ndownloader/files/3956410)
Supplement: Supplementary file 1 [file 3956410]

 
data_shelxl
 
_audit_creation_method            SHELXL-2012
_chemical_name_systematic
;
 ?
;
_chemical_name_common             ?
_chemical_melting_point           ?
_chemical_formula_moiety          
'C8 H14 Au Cl N2' 
_chemical_formula_sum
 'C8 H14 Au Cl N2' 
_chemical_formula_weight          370.63

loop_
 _atom_type_symbol
 _atom_type_description
 _atom_type_scat_dispersion_real
 _atom_type_scat_dispersion_imag
 _atom_type_scat_source
 'C'  'C'   0.0033   0.0016
 'International Tables Vol C Tables 4.2.6.8 and 6.1.1.4'
 'H'  'H'   0.0000   0.0000
 'International Tables Vol C Tables 4.2.6.8 and 6.1.1.4'
 'Au'  'Au'  -2.0133   8.8022
 'International Tables Vol C Tables 4.2.6.8 and 6.1.1.4'
 'Cl'  'Cl'   0.1484   0.1585
 'International Tables Vol C Tables 4.2.6.8 and 6.1.1.4'
 'N'  'N'   0.0061   0.0033
 'International Tables Vol C Tables 4.2.6.8 and 6.1.1.4'
 
_space_group_crystal_system       orthorhombic
_space_group_IT_number            19
_space_group_name_H-M_alt         'P 21 21 21'
_space_group_name_Hall            'P 2ac 2ab'
 
_shelx_space_group_comment
;
The symmetry employed for this shelxl refinement is uniquely defined
by the following loop, which should always be used as a source of
symmetry information in preference to the above space-group names.
They are only intended as comments.
;
 
loop_
 _space_group_symop_operation_xyz
 'x, y, z'
 '-x+1/2, -y, z+1/2'
 'x+1/2, -y+1/2, -z'
 '-x, y+1/2, -z+1/2'
 
_cell_length_a                    8.2009(6)
_cell_length_b                    10.6215(7)
_cell_length_c                    12.1355(9)
_cell_angle_alpha                 90
_cell_angle_beta                  90
_cell_angle_gamma                 90
_cell_volume                      1057.07(13)
_cell_formula_units_Z             4
_cell_measurement_temperature     120(2)
_cell_measurement_reflns_used     ? 
_cell_measurement_theta_min       ? 
_cell_measurement_theta_max       ? 
 
_exptl_crystal_description              prism
_exptl_crystal_colour                   'colourless'
_exptl_crystal_density_meas       ? 
_exptl_crystal_density_method     ?              
_exptl_crystal_density_diffrn     2.329          
_exptl_crystal_F_000              688
_exptl_transmission_factor_min    ?                                             
_exptl_transmission_factor_max    ?                                             
_exptl_crystal_size_max                 0.1
_exptl_crystal_size_mid                 0.05
_exptl_crystal_size_min                 0.01
_exptl_absorpt_coefficient_mu     14.121
_exptl_absorpt_correction_T_min   0.3468
_exptl_absorpt_correction_T_max   0.8683
_exptl_absorpt_correction_type   'multi-scan'
_exptl_absorpt_process_details
;
CrysAlisPro, Agilent Technologies,
Version 1.171.35.19 (release 27-10-2011 CrysAlis171 .NET)
(compiled Oct 27 2011,15:02:11)
Empirical absorption correction using spherical harmonics,
 implemented in SCALE3 ABSPACK scaling algorithm.
;

 
_exptl_special_details
;
 ?
;
 
_diffrn_ambient_temperature       120(2)
_diffrn_radiation_wavelength      0.71073
_diffrn_radiation_type            MoK\a
_diffrn_radiation_source               'Enhance (Mo) X-ray Source'
_diffrn_radiation_monochromator        'graphite'
_diffrn_measurement_device_type        'Xcalibur, Sapphire3'
_diffrn_detector_area_resol_mean        16.4547
_diffrn_radiation_probe                 x-ray
_diffrn_measurement_method              '\w scans'
_diffrn_reflns_number             3998
_diffrn_reflns_av_unetI/netI      0.1051
_diffrn_reflns_av_R_equivalents   0.0972
_diffrn_reflns_limit_h_min        -8
_diffrn_reflns_limit_h_max        11
_diffrn_reflns_limit_k_min        -13
_diffrn_reflns_limit_k_max        14
_diffrn_reflns_limit_l_min        -15
_diffrn_reflns_limit_l_max        12
_diffrn_reflns_theta_min          4.572
_diffrn_reflns_theta_max          29.325
_diffrn_reflns_theta_full         25.000
_diffrn_measured_fraction_theta_max   0.844
_diffrn_measured_fraction_theta_full  0.991
_diffrn_reflns_Laue_measured_fraction_max    0.844
_diffrn_reflns_Laue_measured_fraction_full   0.991
_diffrn_reflns_point_group_measured_fraction_max   0.742
_diffrn_reflns_point_group_measured_fraction_full  0.922
_reflns_number_total              2154
_reflns_number_gt                 1911
_reflns_threshold_expression      'I > 2\s(I)'
_reflns_Friedel_coverage          0.522
_reflns_Friedel_fraction_max      0.602
_reflns_Friedel_fraction_full     0.822
 
_reflns_special_details
;
 Reflections were merged by SHELXL according to the crystal
 class for the calculation of statistics and refinement.
 
 _reflns_Friedel_fraction is defined as the number of unique
 Friedel pairs measured divided by the number that would be
 possible theoretically, ignoring centric projections and
 systematic absences.
;
 
_computing_data_collection
;
CrysAlisPro, Agilent Technologies,
Version 1.171.35.19 (release 27-10-2011 CrysAlis171 .NET)
(compiled Oct 27 2011,15:02:11)
;
_computing_cell_refinement
;
CrysAlisPro, Agilent Technologies,
Version 1.171.35.19 (release 27-10-2011 CrysAlis171 .NET)
(compiled Oct 27 2011,15:02:11)
;
_computing_data_reduction
;
CrysAlisPro, Agilent Technologies,
Version 1.171.35.19 (release 27-10-2011 CrysAlis171 .NET)
(compiled Oct 27 2011,15:02:11)
;
_computing_structure_solution           'SIR97 (Altomare, 1999)'
_computing_structure_refinement   'SHELXL-2012 (Sheldrick, 2012)'
_computing_molecular_graphics           'Ortep-3 for Windows (Farrugia, 1997)'
_computing_publication_material
                                   'WinGX publication routines (Farrugia, 1999)'
 
_refine_special_details
;
 ?
;
_refine_ls_structure_factor_coef  Fsqd
_refine_ls_matrix_type            full
_refine_ls_weighting_scheme       calc
_refine_ls_weighting_details
;
 w=1/[\s^2^(Fo^2^)+(0.0906P)^2^+7.1774P]
 where P=(Fo^2^+2Fc^2^)/3
;
_atom_sites_solution_primary            direct
_atom_sites_solution_secondary          difmap
_atom_sites_solution_hydrogens    geom
_refine_ls_hydrogen_treatment     constr
_refine_ls_extinction_method      SHELXL
_refine_ls_extinction_coef        0.0050(11)
_refine_ls_extinction_expression
 'Fc^*^=kFc[1+0.001xFc^2^\l^3^/sin(2\q)]^-1/4^'
_refine_ls_abs_structure_details
;
 Flack x determined using 570 quotients [(I+)-(I-)]/[(I+)+(I-)]
 (Parsons and Flack (2004), Acta Cryst. A60, s61).
;
_refine_ls_abs_structure_Flack    0.10(5)
_chemical_absolute_configuration  ?
_refine_ls_number_reflns          2154
_refine_ls_number_parameters      58
_refine_ls_number_restraints      3
_refine_ls_R_factor_all           0.0776
_refine_ls_R_factor_gt            0.0709
_refine_ls_wR_factor_ref          0.1863
_refine_ls_wR_factor_gt           0.1793
_refine_ls_goodness_of_fit_ref    1.105
_refine_ls_restrained_S_all       1.105
_refine_ls_shift/su_max           0.001
_refine_ls_shift/su_mean          0.000

_refine_diff_density_max    3.588
_refine_diff_density_min   -5.530
_refine_diff_density_rms    0.495

 
loop_
 _atom_site_label
 _atom_site_type_symbol
 _atom_site_fract_x
 _atom_site_fract_y
 _atom_site_fract_z
 _atom_site_U_iso_or_equiv
 _atom_site_adp_type
 _atom_site_occupancy
 _atom_site_site_symmetry_order  
 _atom_site_calc_flag
 _atom_site_refinement_flags_posn
 _atom_site_refinement_flags_adp
 _atom_site_refinement_flags_occupancy
 _atom_site_disorder_assembly
 _atom_site_disorder_group
Au1 Au 0.74326(9) 0.70383(6) 0.12552(6) 0.0176(4) Uani 1 1 d . . . . .
Cl1 Cl 0.7287(7) 0.8695(4) 0.0061(4) 0.0233(11) Uani 1 1 d . . . . .
C1 C 0.754(3) 0.5657(15) 0.2307(17) 0.016(4) Uiso 1 1 d . . . . .
N2 N 0.891(2) 0.5290(18) 0.2894(18) 0.021(4) Uiso 1 1 d . . . . .
N1 N 0.642(2) 0.4795(17) 0.2613(19) 0.023(4) Uiso 1 1 d . . . . .
C4 C 0.854(3) 0.424(2) 0.351(2) 0.027(3) Uiso 1 1 d . . . . .
H4 H 0.9287 0.3779 0.3952 0.032 Uiso 1 1 calc R U . . .
C3 C 0.696(3) 0.396(2) 0.339(2) 0.027(3) Uiso 1 1 d . . . . .
H3 H 0.6351 0.3328 0.3759 0.032 Uiso 1 1 calc R U . . .
C5 C 1.042(5) 0.598(4) 0.289(4) 0.083(7) Uiso 1 1 d D . . . .
H5A H 1.0666 0.6252 0.2129 0.100 Uiso 1 1 calc R U . . .
H5B H 1.1311 0.5411 0.3132 0.100 Uiso 1 1 calc R U . . .
C2 C 0.477(4) 0.486(3) 0.225(3) 0.046(8) Uiso 1 1 d . . . . .
H2A H 0.4438 0.5738 0.2174 0.069 Uiso 1 1 calc R U . . .
H2B H 0.4062 0.4440 0.2794 0.069 Uiso 1 1 calc R U . . .
H2C H 0.4661 0.4429 0.1539 0.069 Uiso 1 1 calc R U . . .
C7 C 1.016(5) 0.697(3) 0.489(3) 0.083(7) Uiso 1 1 d D . . . .
H7A H 1.1117 0.6499 0.5167 0.100 Uiso 1 1 calc R U . . .
H7B H 0.9191 0.6437 0.5007 0.100 Uiso 1 1 calc R U . . .
C6 C 1.038(5) 0.715(3) 0.366(3) 0.083(7) Uiso 1 1 d D . . . .
H6A H 1.1407 0.7618 0.3541 0.100 Uiso 1 1 calc R U . . .
H6B H 0.9481 0.7698 0.3396 0.100 Uiso 1 1 calc R U . . .
C8 C 0.997(5) 0.815(4) 0.560(4) 0.083(7) Uiso 1 1 d D . . . .
H8A H 1.0278 0.7952 0.6360 0.125 Uiso 1 1 calc R U . . .
H8B H 0.8833 0.8427 0.5578 0.125 Uiso 1 1 calc R U . . .
H8C H 1.0678 0.8816 0.5314 0.125 Uiso 1 1 calc R U . . .
 
loop_
 _atom_site_aniso_label
 _atom_site_aniso_U_11
 _atom_site_aniso_U_22
 _atom_site_aniso_U_33
 _atom_site_aniso_U_23
 _atom_site_aniso_U_13
 _atom_site_aniso_U_12
Au1 0.0286(6) 0.0211(5) 0.0032(4) 0.0012(3) -0.0007(5) 0.0011(3)
Cl1 0.038(3) 0.0204(18) 0.012(2) 0.0041(19) -0.002(3) 0.000(2)
 
_geom_special_details
;
 All esds (except the esd in the dihedral angle between two l.s. planes)
 are estimated using the full covariance matrix.  The cell esds are taken
 into account individually in the estimation of esds in distances, angles
 and torsion angles; correlations between esds in cell parameters are only
 used when they are defined by crystal symmetry.  An approximate (isotropic)
 treatment of cell esds is used for estimating esds involving l.s. planes.
;
 
loop_
 _geom_bond_atom_site_label_1
 _geom_bond_atom_site_label_2
 _geom_bond_distance
 _geom_bond_site_symmetry_2
 _geom_bond_publ_flag
Au1 C1 1.947(18) . ?
Au1 Cl1 2.282(4) . ?
C1 N1 1.35(3) . ?
C1 N2 1.38(3) . ?
N2 C4 1.38(3) . ?
N2 C5 1.44(4) . ?
N1 C3 1.37(3) . ?
N1 C2 1.43(4) . ?
C4 C3 1.33(3) . ?
C4 H4 0.9500 . ?
C3 H3 0.9500 . ?
C5 C6 1.55(2) . ?
C5 H5A 0.9900 . ?
C5 H5B 0.9900 . ?
C2 H2A 0.9800 . ?
C2 H2B 0.9800 . ?
C2 H2C 0.9800 . ?
C7 C6 1.52(2) . ?
C7 C8 1.52(2) . ?
C7 H7A 0.9900 . ?
C7 H7B 0.9900 . ?
C6 H6A 0.9900 . ?
C6 H6B 0.9900 . ?
C8 H8A 0.9800 . ?
C8 H8B 0.9800 . ?
C8 H8C 0.9800 . ?
 
loop_
 _geom_angle_atom_site_label_1
 _geom_angle_atom_site_label_2
 _geom_angle_atom_site_label_3
 _geom_angle
 _geom_angle_site_symmetry_1
 _geom_angle_site_symmetry_3
 _geom_angle_publ_flag
C1 Au1 Cl1 178.4(6) . . ?
N1 C1 N2 102.5(17) . . ?
N1 C1 Au1 131.3(16) . . ?
N2 C1 Au1 126.0(14) . . ?
C4 N2 C1 109.2(17) . . ?
C4 N2 C5 127(3) . . ?
C1 N2 C5 124(3) . . ?
C1 N1 C3 114.3(19) . . ?
C1 N1 C2 122(2) . . ?
C3 N1 C2 123(2) . . ?
C3 C4 N2 109(2) . . ?
C3 C4 H4 125.3 . . ?
N2 C4 H4 125.3 . . ?
C4 C3 N1 104(2) . . ?
C4 C3 H3 127.9 . . ?
N1 C3 H3 127.9 . . ?
N2 C5 C6 113(3) . . ?
N2 C5 H5A 109.1 . . ?
C6 C5 H5A 109.1 . . ?
N2 C5 H5B 109.1 . . ?
C6 C5 H5B 109.1 . . ?
H5A C5 H5B 107.8 . . ?
N1 C2 H2A 109.5 . . ?
N1 C2 H2B 109.5 . . ?
H2A C2 H2B 109.5 . . ?
N1 C2 H2C 109.5 . . ?
H2A C2 H2C 109.5 . . ?
H2B C2 H2C 109.5 . . ?
C6 C7 C8 118(3) . . ?
C6 C7 H7A 107.8 . . ?
C8 C7 H7A 107.8 . . ?
C6 C7 H7B 107.8 . . ?
C8 C7 H7B 107.8 . . ?
H7A C7 H7B 107.2 . . ?
C7 C6 C5 120(3) . . ?
C7 C6 H6A 107.4 . . ?
C5 C6 H6A 107.4 . . ?
C7 C6 H6B 107.4 . . ?
C5 C6 H6B 107.4 . . ?
H6A C6 H6B 107.0 . . ?
C7 C8 H8A 109.5 . . ?
C7 C8 H8B 109.5 . . ?
H8A C8 H8B 109.5 . . ?
C7 C8 H8C 109.5 . . ?
H8A C8 H8C 109.5 . . ?
H8B C8 H8C 109.5 . . ?
 

_shelxl_version_number 2012-9

_shelx_res_file
;
TITL exp_2292 in P 21 21 21
CELL  0.71073   8.2009  10.6215  12.1355   90.000   90.000   90.000
ZERR     4.00   0.0006   0.0007   0.0009    0.000    0.000    0.000
LATT  -1
SYMM  1/2 - X, - Y, 1/2 + Z
SYMM  1/2 + X, 1/2 - Y, - Z
SYMM  - X, 1/2 + Y, 1/2 - Z
SFAC  C    H    AU   CL   N
UNIT  32   56   4    4    8
MERG   2
DFIX 1.51 C5 C6 C6 C7 C7 C8
EADP C3 C4
EADP C5 C6 C7 C8
ACTA 50
TEMP -153
BOND $H
L.S. 4
WGHT    0.090600    7.177400
EXTI    0.005025
FVAR       3.41218
AU1   3    0.743261    0.703833    0.125519    11.00000    0.02856    0.02110 =
         0.00324    0.00117   -0.00072    0.00112
CL1   4    0.728683    0.869476    0.006104    11.00000    0.03752    0.02038 =
         0.01209    0.00412   -0.00175    0.00008
C1    1    0.754461    0.565692    0.230658    11.00000    0.01645
N2    5    0.890890    0.529025    0.289405    11.00000    0.02143
N1    5    0.642490    0.479482    0.261340    11.00000    0.02317
C4    1    0.853626    0.423629    0.351026    11.00000    0.02676
AFIX  43
H4    2    0.928662    0.377863    0.395213    11.00000   -1.20000
AFIX   0
C3    1    0.696128    0.396010    0.338945    11.00000    0.02676
AFIX  43
H3    2    0.635106    0.332751    0.375852    11.00000   -1.20000
AFIX   0
C5    1    1.042107    0.597722    0.289088    11.00000    0.08302
AFIX  23
H5A   2    1.066568    0.625199    0.212907    11.00000   -1.20000
H5B   2    1.131106    0.541114    0.313234    11.00000   -1.20000
AFIX   0
C2    1    0.476575    0.485540    0.225147    11.00000    0.04617
AFIX 137
H2A   2    0.443768    0.573822    0.217431    11.00000   -1.50000
H2B   2    0.406232    0.443999    0.279366    11.00000   -1.50000
H2C   2    0.466118    0.442947    0.153861    11.00000   -1.50000
AFIX   0
C7    1    1.016270    0.697340    0.488956    11.00000    0.08302
AFIX  23
H7A   2    1.111715    0.649898    0.516718    11.00000   -1.20000
H7B   2    0.919056    0.643737    0.500712    11.00000   -1.20000
AFIX   0
C6    1    1.037773    0.714882    0.365582    11.00000    0.08302
AFIX  23
H6A   2    1.140706    0.761777    0.354096    11.00000   -1.20000
H6B   2    0.948147    0.769844    0.339647    11.00000   -1.20000
AFIX   0
C8    1    0.997083    0.814646    0.559835    11.00000    0.08302
AFIX 137
H8A   2    1.027836    0.795157    0.635982    11.00000   -1.50000
H8B   2    0.883300    0.842743    0.557783    11.00000   -1.50000
H8C   2    1.067759    0.881561    0.531372    11.00000   -1.50000

AFIX   0
HKLF    4

REM  exp_2292 in P 21 21 21
REM R1 =  0.0709 for    1911 Fo > 4sig(Fo)  and  0.0776 for all    2154 data
REM     58 parameters refined using      3 restraints

END

WGHT      0.0907      8.8951

REM Highest difference peak  3.588,  deepest hole -5.530,  1-sigma level  0.495
Q1    1   0.8013  0.7842  0.1217  11.00000  0.05    3.59
Q2    1   1.1092  0.6606  0.3739  11.00000  0.05    3.07
Q3    1   0.6934  0.7765  0.1211  11.00000  0.05    2.62
Q4    1   0.6438  0.7015  0.0801  11.00000  0.05    2.53
Q5    1   0.8531  0.7044  0.0787  11.00000  0.05    2.46
Q6    1   0.8496  0.7080  0.1664  11.00000  0.05    2.32
Q7    1   0.7427  0.7032  0.2456  11.00000  0.05    2.31
Q8    1   0.6458  0.7057  0.1635  11.00000  0.05    2.22
Q9    1   0.6812  0.6242  0.1214  11.00000  0.05    2.19
Q10   1   0.7441  0.7006  0.0020  11.00000  0.05    2.06
Q11   1   0.8105  0.6230  0.1184  11.00000  0.05    2.04
Q12   1   0.8895  0.8432  0.6280  11.00000  0.05    1.95
Q13   1   0.9911  0.7757  0.3845  11.00000  0.05    1.91
Q14   1   0.7518  0.4692  0.5074  11.00000  0.05    1.85
Q15   1   0.7429  0.8073  0.0493  11.00000  0.05    1.80
Q16   1   1.0580  0.8523  0.4780  11.00000  0.05    1.79
Q17   1   1.0552  0.3088  0.3661  11.00000  0.05    1.56
Q18   1   0.7311  0.5229  0.2424  11.00000  0.05    1.51
Q19   1   0.6258  0.8686 -0.0506  11.00000  0.05    1.47
Q20   1   0.7450  0.5921  0.0568  11.00000  0.05    1.45
;
_shelx_res_checksum   87818

_shelx_hkl_file
;
   0   0   3-524.864 798.453   2
   0   0  -3 1053.97 694.520   2
   0   0   4 280445. 15938.5   2
   0   0  -4 327627. 12012.5   2
   0   0  -5 1407.59 994.120   2
   0   0   5 1947.62 514.601   1
   0   0  -6 19442.6 3513.75   2
   0   0   6 16308.0 1408.21   1
   0   0   7 1659.93 529.277   1
   0   0  -7 1554.34 1092.39   2
   0   0   8 802934. 12272.2   1
   0   0  -8 999999. 27165.5   2
   0   0  -9 10421.3 3034.74   2
   0   0 -10 2607.68 1322.76   2
   0   0 -11-40.4997 202.946   2
   0   0 -12 314463. 18408.4   2
   0   0 -13 1718.92 1124.31   2
   0   0 -14 12529.4 4108.56   2
   0   0 -15 4599.71 2438.83   2
   0   1  -3 221243. 4896.16   1
   0   1   3 365475. 8841.53   4
   0   1   3 246226. 10486.1   2
   0   1  -3 349169. 12041.4   2
   0  -1  -3 334448. 11592.7   2
   0  -1   3 166873. 9814.06   2
   0  -1   4 6355.98 2529.75   2
   0   1  -4 5432.98 840.000   1
   0   1  -4 6204.47 1878.60   2
   0  -1  -4 8228.43 2140.64   2
   0   1   4 6394.36 1572.89   4
   0   1   4 3740.77 1483.56   2
   0   1  -5 314080. 13853.6   2
   0  -1  -5 255006. 12670.1   2
   0   1  -6 82944.6 7245.53   2
   0  -1  -6 71631.0 7171.56   2
   0   1  -7 447201. 16766.5   2
   0  -1  -7 389485. 17997.8   2
   0  -1  -8-679.273 1267.83   2
   0   1  -8 1981.77 1309.47   2
   0   1  -9 297536. 14711.7   2
   0  -1  -9 255946. 15597.8   2
   0  -1 -10 36798.2 6390.27   2
   0   1 -10 28533.1 4814.31   2
   0   1 -11 175729. 12246.8   2
   0  -1 -11 147798. 12523.4   2
   0   1 -12-527.792 1484.94   2
   0  -1 -12-84.0122 1437.67   2
   0  -1 -13 98219.1 11020.2   2
   0   1 -13 87777.8 9921.78   2
   0   1 -14 23312.0 5110.57   2
   0   1 -15 121474. 11531.6   2
   0   2   2 122665. 5339.68   4
   0  -2   2 106644. 4892.69   3
   0  -2  -2 111275. 5415.00   4
   0   2  -2 124696. 4942.79   2
   0   2   3 77445.2 5083.64   4
   0  -2   3 44128.7 4274.20   2
   0   2   3 56099.8 5128.44   2
   0   2  -3 69818.8 4591.38   2
   0  -2  -3 61156.9 4124.70   4
   0   2  -4 846697. 20744.7   2
   0  -2  -4 756227. 16194.3   4
   0   2  -5 70630.2 6572.23   2
   0   2  -5 39614.8 2644.67   1
   0   2  -6 12826.3 3015.31   2
   0   2  -6 7148.50 1183.19   1
   0  -2  -7 120583. 10360.5   2
   0   2  -7 144163. 10441.5   2
   0   2  -8 442162. 17871.7   2
   0  -2  -8 357707. 18589.5   2
   0   2  -9 41472.5 5411.69   2
   0  -2  -9 36461.5 6472.48   2
   0   2 -10 1883.76 682.989   2
   0   2 -11 48505.9 6175.82   2
   0   2 -12 227897. 13938.6   2
   0   2 -13 71096.6 8165.25   2
   0   2 -14-337.422 750.809   2
   0   2 -15 34827.9 6380.44   2
   0   3   0 2477.09 571.512   3
   0   3  -1 43858.0 2682.90   3
   0  -3   1 44944.9 2835.10   3
   0   3   2 337215. 9628.19   4
   0  -3  -2 315681. 10195.7   4
   0   3  -2 346589. 8806.69   3
   0  -3   2 340812. 9076.35   3
   0  -3  -3 150541. 7707.49   4
   0  -3   3 154499. 7280.03   3
   0   3   3 184761. 8041.83   4
   0   3  -3 175159. 7127.27   2
   0  -3  -4 5884.68 1516.53   4
   0   3  -4 6668.51 1548.21   2
   0  -3  -5 108913. 6856.40   4
   0   3  -5 175504. 9742.84   2
   0   3  -6 171088. 6805.09   1
   0   3  -6 359171. 15447.5   2
   0   3  -7 15402.0 1831.35   1
   0   3  -7 38028.7 5370.64   2
   0   3  -8 1374.56 538.921   2
   0   3  -9 70263.9 7585.04   2
   0   3 -10 219022. 12778.2   2
   0   3 -11 96522.1 8421.57   2
   0   3 -12 1872.47 1416.54   2
   0   3 -13 86512.0 8644.47   2
   0   3 -14 126510. 10773.6   2
   0   3 -15 44652.5 6669.06   2
   0   4   0 41868.2 2642.30   3
   0   4  -1 294842. 7931.99   3
   0   4  -2 65372.0 4083.63   3
   0  -4  -2 61270.4 5158.29   4
   0  -4  -3 354022. 13720.3   4
   0   4  -3 403133. 10617.5   2
   0   4  -4 164201. 8013.84   2
   0  -4  -4 125384. 8203.29   4
   0  -4  -5 244604. 11305.2   4
   0   4  -5 320082. 11821.1   2
   0   4  -6 40125.0 4896.56   2
   0  -4  -6 29458.4 3993.69   4
   0   4  -7 189770. 11775.2   2
   0   4  -8 36984.7 5480.30   2
   0   4  -9 201250. 13051.7   2
   0   4 -10 7036.66 2290.57   2
   0   4 -11 100454. 8929.04   2
   0   4 -12 83513.6 7959.71   2
   0   4 -13 93908.0 8655.18   2
   0   4 -14 1711.40 1266.87   2
   0   4 -15 54166.9 7006.39   2
   0   5   0 4430.53 1054.99   3
   0   5  -1 781.132 371.139   3
   0  -5  -2 565078. 17447.8   4
   0   5  -2 596578. 13344.2   3
   0  -5  -3 19295.8 3369.44   4
   0   5  -3 19261.2 2653.97   3
   0   5  -4 982.807 676.966   2
   0  -5  -4 2202.31 1162.34   4
   0  -5  -5 17631.0 3456.11   4
   0   5  -5 19855.3 2858.45   2
   0   5  -6 505772. 16949.0   2
   0  -5  -6 364653. 15561.8   4
   0  -5  -7 2324.07 1411.25   4
   0   5  -7 1997.32 1137.18   2
   0   5  -8 4553.10 2060.94   2
   0   5  -9 866.972 927.835   2
   0   5 -10 278529. 15768.5   2
   0   5 -11 18250.4 4104.70   2
   0   5 -12-847.924 1364.13   2
   0   5 -13 1754.00 515.718   2
   0   5 -14 132545. 10431.9   2
   0   5 -15 3719.33 1894.87   2
   0   6   0 17550.9 2233.40   3
   0   6  -1 279868. 9343.30   3
   0   6  -2 4454.76 1201.16   3
   0  -6  -2 2132.98 1294.98   4
   0   6  -3 223001. 9338.55   3
   0  -6  -3 207081. 12212.0   4
   0  -6  -4 4173.20 1941.63   4
   0   6  -4 2045.61 859.029   2
   0   6  -5 201534. 9582.72   2
   0  -6  -5 170630. 11925.5   4
   0  -6  -6-44.7356 926.698   4
   0   6  -6-238.107 744.837   2
   0   6  -7 132322. 9283.83   2
   0  -6  -7 94273.0 8498.02   4
   0  -6  -8 14792.2 3593.24   4
   0   6  -8 14864.5 3680.98   2
   0   6  -9 203810. 13222.2   2
   0   6 -10 1579.63 1152.62   2
   0   6 -11 119244. 10567.1   2
   0   6 -12 3810.12 1331.75   2
   0   6 -13 75967.7 7908.04   2
   0   6 -14-680.382 1230.62   2
   0   7   0 1440.95 777.912   3
   0   7   1 11093.0 1910.40   3
   0   7  -1 12734.0 2119.54   3
   0  -7  -2 287129. 15638.3   4
   0   7  -2 296061. 10803.0   3
   0   7  -3 41621.8 4263.96   3
   0  -7  -3 40458.3 5950.26   4
   0   7  -4 1920.11 970.200   2
   0   7  -4 1323.25 458.715   3
   0  -7  -4 3024.41 1793.45   4
   0  -7  -5 60222.4 7706.66   4
   0   7  -5 72094.0 5815.93   2
   0   7  -6 218503. 10606.5   2
   0  -7  -6 192843. 13695.8   4
   0  -7  -7 16029.3 3930.68   4
   0   7  -7 15261.4 3054.20   2
   0  -7  -8 3055.38 1698.34   4
   0   7  -8 2738.95 1465.00   2
   0   7  -9 19099.2 3984.02   2
   0   7 -10 190783. 13333.2   2
   0   7 -11 25836.9 4926.58   2
   0   7 -12 1058.91 1281.09   2
   0   7 -13 17580.7 4138.23   2
   0   7 -14 76212.4 8013.51   2
   0   8   0 100652. 6531.73   3
   0   8   1 74054.4 5314.20   3
   0   8  -1 78230.1 5762.06   3
   0   8  -2 10341.5 2137.75   3
   0  -8  -2 8425.57 3025.85   4
   0  -8  -3 60394.2 8037.22   4
   0   8  -3 60652.8 5431.84   3
   0  -8  -4 178799. 14340.4   4
   0   8  -4 212215. 11286.6   3
   0   8  -5 53443.5 5152.29   2
   0  -8  -5 54954.4 8251.32   4
   0  -8  -6 6723.20 2653.67   4
   0   8  -6 9417.68 2324.99   2
   0   8  -7 70113.1 6493.89   2
   0  -8  -7 57540.1 7903.58   4
   0  -8  -8 54603.5 7601.91   4
   0   8  -8 84548.2 7934.17   2
   0  -8  -9 57644.9 8319.26   4
   0   8  -9 61269.8 7109.21   2
   0   8 -10 7725.22 2505.86   2
   0   8 -11 39722.8 6149.89   2
   0   8 -12 90371.6 9556.68   2
   0   8 -13 37356.4 6101.41   2
   0   9   0 3719.79 1386.66   3
   0   9  -1 69354.9 5764.66   3
   0   9   1 59589.0 5217.48   3
   0  -9  -1 59852.3 8513.13   4
   0   9   2 50783.6 4612.06   3
   0  -9  -2 50286.3 8096.29   4
   0   9  -2 59654.0 5561.87   3
   0   9  -3 173884. 9742.53   3
   0  -9  -3 148937. 13914.1   4
   0   9  -4 352.435 87.5442   3
   0  -9  -4 2237.66 2103.81   4
   0  -9  -5 112513. 13043.9   4
   0   9  -5 124364. 8086.69   2
   0  -9  -6 60813.7 9108.70   4
   0   9  -6 78755.2 7062.99   2
   0  -9  -7 44713.9 7735.43   4
   0   9  -7 49960.6 5564.96   2
   0  -9  -8 1552.34 1515.80   4
   0   9  -8 1622.20 1085.16   2
   0   9  -9 46602.9 6326.98   2
   0  -9  -9 34064.1 6592.39   4
   0   9 -10 34591.4 5711.95   2
   0   9 -11 83619.7 8917.79   2
   0  10   0 188878. 10221.1   3
   0 -10  -1 4609.47 2631.59   4
   0  10  -1 3155.20 1500.58   3
   0  10   1 4624.36 1631.05   3
   0  10   2 5590.04 1660.46   3
   0 -10  -2 7515.73 3451.55   4
   0  10  -2 5731.28 1839.46   3
   0  10   3 3863.53 1384.40   3
   0  10  -3 5715.47 1692.96   3
   0 -10  -3 4703.78 2405.93   4
   0 -10  -4 186108. 17186.6   4
   0  10  -4 202703. 12313.3   3
   0  10  -5 17994.0 3328.76   2
   0 -10  -5 19301.0 5755.51   4
   0  10  -6 4666.14 1726.82   2
   0 -10  -6 2499.57 2365.23   4
   0 -10  -7 2005.97 2196.52   4
   0  10  -7 3212.28 1276.17   2
   0  10  -8 119196. 9514.31   2
   0 -10  -8 105924. 12713.3   4
   0 -10  -9 2754.94 1622.08   4
   0  10  -9 2825.35 1684.33   2
   0  10 -10 2844.15 1590.60   2
   0 -10 -10 4929.78 2717.95   4
   0  11   0 661.190 868.840   3
   0 -11  -1 90944.8 12583.2   4
   0  11   1 86210.2 7382.68   3
   0  11  -1 90315.7 7626.67   3
   0  11  -2-173.760 1021.82   3
   0  11   2-248.383 630.042   3
   0 -11  -2 682.468 742.419   4
   0  11  -3 61774.8 6620.14   3
   0  11   3 48925.5 5449.75   3
   0 -11  -3 56963.6 10161.9   4
   0 -11  -4 711.429 742.276   4
   0  11  -4-740.771 1431.14   3
   0  11  -5 68341.1 6494.03   2
   0 -11  -5 75147.0 12706.8   4
   0 -11  -6-1740.72 2810.41   4
   0  11  -6 1636.65 917.240   2
   0 -11  -7 86378.0 12596.5   4
   0  11  -7 83527.6 7835.71   2
   0  11  -8-297.456 457.176   2
   0 -11  -8 714.435 1207.36   4
   0 -11  -9 49497.1 8914.28   4
   0 -12   0 140774. 17215.7   4
   0  12   0 143701. 10223.7   3
   0  12  -1 3121.07 1441.62   3
   0 -12  -1 8254.69 3974.80   4
   0  12   1 5207.98 1863.74   3
   0  12  -2 4077.88 1422.65   3
   0 -12  -2 4716.91 2721.45   4
   0  12   2 3920.27 1647.19   3
   0  12  -3 10933.3 2653.29   3
   0  12   3 7564.40 2369.75   3
   0 -12  -3 8791.11 4403.57   4
   0  12   4 60274.9 6485.78   3
   0 -12  -4 66373.4 12086.6   4
   0  12  -4 83861.0 8967.59   3
   0 -12  -5 5764.04 3319.05   4
   0  12  -5 5451.45 1926.12   2
   0 -12  -6 4608.08 2077.46   4
   0  12  -6 6299.65 2145.13   2
   0 -12  -7 3271.74 2406.96   4
   0  13   0 982.250 1132.82   3
   0 -13   0 1122.87 1845.54   4
   0 -13  -1 42716.5 10553.3   4
   0  13   1 51078.3 6503.39   3
   0  13  -1 60117.7 7134.57   3
   0  13  -2 35007.9 5526.70   3
   0  13   2 27895.4 4885.32   3
   0 -13  -2 29756.5 8634.66   4
   0  13  -3 16517.0 3975.55   3
   0 -13  -3 14199.2 5823.95   4
   0  13   3 18157.6 3886.30   3
   0  13  -4 1197.97 827.728   2
   0  13   4 390.787 1288.96   3
   0 -13  -4 1249.04 1872.81   4
   0 -13  -5 16058.6 6400.87   4
   0  13   5 12742.3 3381.04   3
   1   0  -3 1711.34 1060.83   2
  -1   0   3 613.428 940.752   2
  -1   0  -3 1472.21 713.596   2
   1   0   3 1156.14 800.488   2
  -1   0   4 11865.0 3471.34   2
   1   0  -4 21548.1 3817.45   2
  -1   0  -4 21462.7 2946.15   2
   1   0   4 15164.6 2978.06   2
   1   0  -5 4847.87 1667.44   2
  -1   0  -5 2299.37 1074.56   2
  -1   0  -6 573546. 18637.5   2
   1   0  -6 675516. 21342.4   2
  -1   0  -7 3621.89 1399.81   2
   1   0  -7 4939.01 1953.58   2
   1   0   7 4816.36 1162.97   1
  -1   0  -8-228.564 490.846   2
   1   0   8 483.311 428.999   1
   1   0  -8 1011.29 1096.05   2
   1   0  -9 2288.64 1123.88   2
   1   0   9 2471.62 886.115   1
  -1   0  -9 1695.96 1229.90   2
   1   0 -10 606370. 23545.7   2
  -1   0 -10 559347. 22161.6   2
   1   0 -11 2570.84 2023.05   2
  -1   0 -11 3284.72 1235.86   2
   1   0 -12 1833.50 1531.61   2
  -1   0 -12 105.260 504.401   2
  -1   0 -13 3479.52 1792.55   2
   1   0 -13 2879.22 1664.60   2
   1   0 -14 248609. 17474.6   2
   1   0 -15 8782.21 3551.85   2
   1   1 -15 88978.9 10787.2   2
   1   1 -14 1848.94 1294.29   2
   1   1 -13 117491. 11365.7   2
   1   1 -12 41289.7 6165.59   2
   1   1 -11 201112. 13353.8   2
   1   1 -10 15043.0 3566.92   2
   1   1  -9 259650. 14523.8   2
  -1  -1  -8 37541.8 5441.88   2
   1   1  -8 37192.4 5460.25   2
   1  -1   7 254996. 9591.82   1
  -1  -1  -7 245571. 13678.8   2
   1  -1   6 15520.0 2232.06   1
   1   1  -6 17611.0 3914.09   2
   1  -1   5 276513. 8550.86   1
   1   1  -5 262970. 13654.7   2
   1   1  -4 105917. 8302.38   2
   1  -1   4 64408.0 7399.07   2
  -1   1   4 124181. 5848.25   4
  -1   1   4 76736.2 8536.51   2
   1  -1   4 106242. 5009.52   1
  -1   1   3 433034. 8572.39   4
   1  -1   3 407370. 9379.98   1
   1   1  -3 405194. 13736.7   2
   1   1  -2 96961.5 5166.90   2
  -1   1   2 108847. 3663.79   4
   1  -1   2 107513. 4840.59   1
  -1  -1   2 86108.6 5365.62   2
  -1   1  -2 80461.8 3648.51   1
   1  -1  -2 95727.1 5626.27   2
  -1   1  -2 101813. 4419.06   2
   1  -1  -3 322690. 11867.2   2
  -1   1  -3 339020. 9596.57   2
   1   1   4 90958.8 7132.49   2
  -1   1  -4 106064. 6116.20   2
   1  -1  -4 100687. 7509.85   2
  -1   1  -5 275361. 10783.5   2
   1  -1  -5 222198. 12161.7   2
  -1   1  -6 19681.1 3085.74   2
   1  -1  -6 9147.16 2550.86   2
  -1   1  -7 329840. 13573.5   2
   1  -1  -7 242104. 13841.8   2
  -1   1  -8 35921.9 4770.17   2
   1  -1  -8 44401.4 6451.43   2
   1  -1  -9 272721. 16360.3   2
  -1   1  -9 297969. 14385.5   2
   1  -1 -10 15454.3 3939.88   2
  -1   1 -10 20212.5 3929.70   2
   1   1  10 10473.8 1741.37   1
  -1   1 -11 250182. 14718.0   2
   1  -1 -11 221173. 16392.6   2
   1  -1 -12 55532.7 8177.27   2
  -1   1 -12 43670.9 6243.13   2
   1  -1 -13 135150. 12836.2   2
  -1   1 -13 148798. 11834.5   2
   1  -1 -14 2873.84 1814.75   2
  -1   1 -14-170.662 885.574   2
   1  -1 -15 72104.3 10320.2   2
  -1   1 -15 86822.9 9849.89   2
   1   2 -15 12056.6 3747.09   2
   1   2 -14 168582. 13131.4   2
   1   2 -13 45001.5 6661.00   2
   1   2 -12 3973.33 1884.83   2
   1   2 -11 109342. 9640.22   2
   1   2 -10 314843. 16121.8   2
   1   2  -9 30375.3 5284.24   2
   1   2  -8 3507.74 2262.01   2
   1   2  -7 38191.2 5796.65   2
   1   2  -6 461391. 19016.3   2
   1   2  -6 238983. 5751.03   1
   1   2  -5 199688. 11613.0   2
   1  -2   5 67832.5 7558.54   2
  -1  -2  -4 11885.4 2066.64   4
   1   2  -4 12177.8 2579.81   2
  -1   2   4 13866.3 2128.39   4
  -1   2   3 333498. 12954.3   2
   1  -2   3 337554. 12032.9   3
  -1   2   3 453648. 11043.1   4
   1   2  -3 415967. 12003.0   2
   1  -2   3 256238. 9593.65   2
  -1  -2  -3 362013. 10582.1   4
  -1  -2  -2 562406. 12763.6   4
  -1   2   2 563204. 9793.09   4
   1  -2   2 566768. 12316.6   3
  -1   2   2 595166. 15430.3   2
   1   2  -1 67360.4 2679.21   3
  -1  -2  -1 61985.2 3833.30   4
   1  -2   1 69978.5 3577.95   3
  -1   2   0 7675.17 916.265   3
  -1   2  -1 56450.8 2879.61   3
   1   2   1 56434.3 3534.70   4
  -1  -2   1 56180.7 2296.65   3
   1   2   2 708784. 14361.0   4
  -1  -2   2 684454. 11384.9   3
  -1   2  -2 718419. 10396.1   2
  -1   2  -3 294771. 8457.22   1
  -1  -2   3 300472. 11770.3   2
   1   2   3 492528. 14182.3   4
   1  -2  -3 345114. 8864.63   4
   1  -2  -3 500102. 15697.8   2
  -1   2  -3 442988. 11513.4   2
  -1   2  -4 15035.8 2481.73   2
   1  -2  -4 19042.0 3509.92   2
   1  -2  -5 246576. 13402.8   2
  -1   2  -5 249860. 11310.1   2
  -1   2  -6 588014. 17579.8   2
   1  -2  -6 476582. 19833.4   2
  -1   2  -7 59317.1 5582.86   2
   1  -2  -7 58065.6 7245.11   2
   1  -2  -8-25.7956 852.013   2
  -1   2  -8 1847.69 948.387   2
  -1   2  -9 23361.8 3712.21   2
   1  -2  -9 22253.0 5209.02   2
   1  -2 -10 280065. 18521.4   2
  -1   2 -10 347983. 15554.4   2
  -1   2 -11 133969. 10011.5   2
   1  -2 -11 135243. 13173.5   2
  -1   2 -12 3528.16 1515.92   2
   1  -2 -12-165.586 1015.84   2
  -1   2 -13 60100.4 7388.81   2
   1  -2 -13 68046.6 10345.4   2
  -1   2 -14 187210. 13702.6   2
  -1   2 -15 11631.6 3491.87   2
   1   3 -15 37102.6 5975.90   2
   1   3 -14 2463.79 1900.58   2
   1   3 -13 77000.6 8210.50   2
   1   3 -12 183006. 12433.5   2
   1   3 -11 44806.5 6290.25   2
   1   3 -10 5269.23 2102.27   2
   1   3  -9 111803. 10381.2   2
   1   3  -8 66478.5 3228.95   1
   1   3  -8 164558. 12261.1   2
   1   3  -7 115927. 9986.32   2
   1   3  -6 15309.9 3231.93   2
  -1  -3  -5 162748. 8483.75   4
   1   3  -5 226471. 11509.3   2
  -1   3   4 663685. 15069.4   4
   1   3  -4 614080. 16111.5   2
   1   3  -3 187233. 8001.97   2
  -1  -3  -3 151422. 8056.35   4
  -1   3   3 169757. 6813.81   4
  -1   3   3 140474. 8772.19   2
  -1  -3  -2 4848.19 1373.62   4
   1  -3   2 6438.98 1430.67   3
   1   3  -2 5098.52 1032.07   3
  -1  -3  -1 187283. 7627.74   4
   1  -3   1 198518. 6672.70   3
   1   3  -1 199040. 5419.19   3
  -1   3   0 181295. 5234.16   3
  -1   3  -1 174888. 5617.17   3
  -1  -3   1 157177. 4311.93   3
  -1   3  -2 6688.35 1174.41   3
   1  -3  -2 4402.87 1240.03   4
  -1  -3   2 5159.35 970.214   3
   1   3   2 6139.35 1406.70   4
  -1   3  -3 188925. 6625.93   2
  -1  -3   3 184481. 7212.86   3
  -1   3  -4 359835. 10602.5   1
   1  -3  -4 469405. 13256.7   4
   1  -3  -5 182219. 8899.97   4
  -1   3  -5 255633. 11389.7   2
  -1   3  -6 11594.0 2587.79   2
  -1   3  -7 120262. 8691.28   2
  -1   3  -8 210724. 11417.6   2
  -1   3  -9 102511. 7896.60   2
  -1   3 -10 7684.84 2330.25   2
  -1   3 -11 45143.5 5662.22   2
  -1   3 -12 197533. 12327.9   2
  -1   3 -13 93240.2 8738.44   2
  -1   3 -14 3800.77 2143.18   2
  -1   3 -15 37429.3 6251.38   2
   1   4 -15 67383.0 7989.13   2
   1   4 -14 47749.2 6514.10   2
   1   4 -13 102581. 9380.85   2
   1   4 -12 2135.99 433.957   2
   1   4 -11 115609. 10589.9   2
   1   4 -10 30974.2 5543.93   2
   1   4  -9 128784. 10831.5   2
   1   4  -8 2324.97 1538.84   2
   1   4  -8 932.822 449.459   1
   1   4  -7 209230. 12594.9   2
  -1  -4  -6 91135.7 7131.76   4
   1   4  -6 143933. 9701.92   2
  -1  -4  -5 209973. 10741.6   4
   1   4  -5 273088. 11592.8   2
  -1  -4  -4 3415.52 1254.02   4
   1   4  -4 4713.79 1461.63   2
  -1  -4  -3 222092. 11202.0   4
   1   4  -3 258537. 9515.92   2
  -1  -4  -2 101952. 6854.96   4
   1   4  -2 110577. 5163.30   3
  -1  -4  -1 220347. 9498.80   4
   1   4  -1 232692. 6757.76   3
  -1   4   0 8597.49 1341.16   3
   1   4   0 8424.21 1161.12   3
  -1   4  -1 227905. 7162.05   3
   1  -4  -2 99758.9 6301.19   4
  -1  -4   2 93686.6 4569.69   3
  -1   4  -2 98213.4 5135.61   3
   1  -4  -3 226993. 10498.3   4
  -1   4  -3 238228. 9216.79   3
  -1   4  -4 3496.96 1007.55   2
   1  -4  -4 3345.85 1271.57   4
   1  -4  -5 200618. 9947.48   4
  -1   4  -5 270981. 11002.1   2
  -1   4  -6 145539. 9120.42   2
   1  -4  -6 101221. 7478.06   4
  -1   4  -7 174689. 10470.8   2
  -1   4  -8 2257.21 1538.29   2
  -1   4  -9 163182. 10441.5   2
  -1   4 -10 38163.7 4878.97   2
  -1   4 -11 122941. 9075.14   2
  -1   4 -12 3972.66 1727.16   2
  -1   4 -13 114412. 9405.82   2
  -1   4 -14 50996.6 6618.59   2
  -1   4 -15 76742.9 8713.47   2
   1   5 -14 1297.87 844.822   2
   1   5 -13 3763.28 1597.86   2
   1   5 -12 196844. 13828.3   2
   1   5 -11 3042.28 1751.81   2
   1   5 -10 1316.98 658.724   2
   1   5  -9 6541.04 2380.30   2
   1   5  -8 462895. 19231.9   2
  -1  -5  -7 8351.11 2343.41   4
   1   5  -7 12912.7 3210.14   2
  -1  -5  -6 1130.95 1125.49   4
   1   5  -6 1529.39 514.807   2
   1   5  -5 5235.58 1863.85   2
  -1  -5  -5 4357.24 1596.97   4
   1   5  -4 340227. 11875.7   2
  -1  -5  -4 288613. 14003.7   4
   1   5  -3 682.039 110.518   3
  -1  -5  -3 533.785 649.893   4
   1   5  -2 4680.53 1162.99   3
  -1  -5  -2 4232.05 1455.54   4
   1   5  -1 9162.12 1496.94   3
  -1  -5  -1 10824.2 2422.03   4
   1   5   0 584485. 11252.9   3
  -1   5   0 564582. 11681.6   3
  -1   5  -1 10055.8 1661.09   3
  -1   5  -2 5102.75 1394.01   3
   1  -5  -2 3529.66 1424.75   4
  -1   5  -3 1250.99 590.083   3
   1  -5  -3 251.026 751.152   4
   1  -5  -4 299702. 14060.3   4
  -1   5  -4 359950. 10820.8   2
  -1   5  -5 2883.15 1044.31   2
   1  -5  -5 3133.22 1386.41   4
  -1   5  -6 3487.22 1512.66   2
   1  -5  -6 1147.05 893.188   4
  -1   5  -7 14599.9 3252.50   2
   1  -5  -7 7085.19 2239.67   4
  -1   5  -8 417311. 16754.1   2
  -1   5  -9 5676.15 2237.61   2
  -1   5 -10 2311.06 1140.88   2
  -1   5 -11 3261.26 1410.39   2
  -1   5 -12 202488. 11866.6   2
  -1   5 -13 7159.49 2320.67   2
  -1   5 -14 2689.08 1437.42   2
   1   6 -14 2577.87 1338.10   2
   1   6 -13 41317.3 6500.51   2
   1   6 -12 784.209 1233.08   2
   1   6 -11 93099.0 9630.62   2
   1   6 -10 6811.79 2676.78   2
   1   6  -9 206067. 13591.6   2
  -1  -6  -8 2104.45 1128.82   4
   1   6  -8 2984.39 2015.69   2
  -1  -6  -7 177981. 11745.5   4
   1   6  -7 287105. 14139.1   2
   1   6  -6 29921.8 4085.58   2
  -1  -6  -6 18181.2 3906.37   4
  -1  -6  -5 106948. 9423.79   4
   1   6  -5 129413. 8261.52   2
  -1  -6  -4 6242.51 2419.13   4
   1   6  -4 5492.44 1619.22   2
  -1  -6  -3 115289. 9136.99   4
   1   6  -3 127492. 7292.90   3
   1   6  -2 23936.0 2893.76   3
  -1  -6  -2 19460.5 3773.05   4
   1   6  -1 361953. 10428.0   3
  -1  -6  -1 325862. 14796.5   4
  -1   6   0 296.201 345.135   3
   1   6   0 187.714 319.863   3
  -1   6  -1 330583. 10260.2   3
   1  -6  -2 21595.2 3687.97   4
  -1   6  -2 20713.6 2701.81   3
  -1   6  -3 116924. 6706.12   3
   1  -6  -3 110285. 8851.45   4
  -1   6  -4 4328.58 1323.07   2
   1  -6  -4 4582.62 1937.27   4
   1  -6  -5 106727. 9247.02   4
  -1   6  -5 127019. 7140.34   2
  -1   6  -6 26101.6 3660.28   2
   1  -6  -6 18186.0 3759.25   4
  -1   6  -7 278411. 13645.3   2
   1  -6  -7 194296. 12020.9   4
  -1   6  -8 3695.83 1648.74   2
  -1   6  -9 197031. 12150.8   2
  -1   6 -10 8738.03 2544.45   2
  -1   6 -11 100179. 8663.62   2
  -1   6 -12-694.905 1180.11   2
  -1   6 -13 37434.8 5171.22   2
   1   7 -13 22460.2 5040.04   2
   1   7 -12 97403.3 10381.7   2
   1   7 -11 11547.5 3178.50   2
   1   7 -10 3101.00 1797.27   2
   1   7  -9 14744.0 3806.29   2
  -1  -7  -8 208040. 13684.4   4
   1   7  -8 305427. 15563.0   2
   1   7  -7 24457.5 3928.98   2
  -1  -7  -7 19677.6 4363.84   4
  -1  -7  -6 7555.85 2560.30   4
   1   7  -6 11540.8 2689.52   2
   1   7  -5 37420.8 4560.37   2
  -1  -7  -5 31833.4 5761.08   4
   1   7  -4 232079. 10700.3   2
  -1  -7  -4 209200. 14721.9   4
   1   7  -3 32262.6 3762.81   3
  -1  -7  -3 22595.5 4456.31   4
  -1  -7  -2 5727.88 2145.41   4
   1   7  -2 7916.29 1914.49   3
  -1  -7  -1 53938.4 6695.39   4
   1   7  -1 52014.1 4336.34   3
  -1   7   1 41449.6 3648.48   3
  -1   7   0 405237. 11906.0   3
   1   7   0 422738. 11836.2   3
   1   7   1 39326.1 3466.58   3
  -1   7  -1 44562.7 4045.59   3
   1  -7  -2 4085.35 1748.58   4
  -1   7  -2 7429.17 1646.84   3
   1  -7  -3 22541.3 4506.01   4
  -1   7  -3 26964.8 3387.07   3
  -1   7  -4 212099. 10730.9   3
  -1   7  -4 206577. 8533.90   2
   1  -7  -4 192428. 13699.2   4
  -1   7  -5 50656.3 4723.87   2
   1  -7  -5 39701.0 6199.08   4
   1  -7  -6 9175.97 2855.87   4
  -1   7  -6 6631.04 1776.36   2
   1  -7  -7 23694.0 4629.94   4
  -1   7  -7 33568.6 4580.06   2
   1  -7  -8 214099. 14166.2   4
  -1   7  -8 283008. 14219.7   2
  -1   7  -9 20362.0 3922.70   2
  -1   7 -10 3319.43 1435.74   2
  -1   7 -11 17570.5 3933.98   2
  -1   7 -12 107381. 9005.05   2
   1   8 -13 17735.5 4575.60   2
   1   8 -12 2026.06 1010.05   2
   1   8 -11 42995.3 6645.90   2
   1   8 -10 77167.6 8765.07   2
   1   8  -9 47317.7 6810.40   2
  -1  -8  -9 40062.4 6771.01   4
   1   8  -8 1731.37 638.274   2
  -1  -8  -8 3026.19 2080.04   4
  -1  -8  -7 73605.3 9140.39   4
   1   8  -7 80373.7 7159.44   2
  -1  -8  -6 92895.3 10196.9   4
   1   8  -6 137301. 9347.93   2
   1   8  -5 49967.1 5217.44   2
  -1  -8  -5 43627.6 7135.19   4
  -1  -8  -4 3667.50 2210.56   4
  -1  -8  -3 78054.7 9168.73   4
   1   8  -3 83865.4 6507.29   3
   1   8  -2 139400. 8095.88   3
  -1  -8  -2 125803. 11426.8   4
  -1   8   1 97657.8 6173.36   3
  -1  -8  -1 96810.7 9812.63   4
   1   8  -1 108971. 6757.69   3
  -1   8   0 2527.38 1215.01   3
   1   8   0 2575.11 836.316   3
  -1   8  -1 105548. 6680.55   3
   1   8   1 102017. 6289.11   3
  -1   8  -2 138743. 7923.65   3
   1  -8  -2 142924. 12014.7   4
  -1   8  -3 84250.6 6317.14   3
   1  -8  -3 81273.8 9297.00   4
  -1   8  -4 4006.49 1463.92   3
  -1   8  -4 3346.61 1222.72   2
   1  -8  -4 4155.29 2484.29   4
   1  -8  -5 49361.6 7813.23   4
  -1   8  -5 52663.2 4942.85   2
   1  -8  -6 99237.7 10627.4   4
  -1   8  -6 109010. 7315.44   2
   1  -8  -7 65824.4 8746.90   4
  -1   8  -7 92443.5 7586.94   2
  -1   8  -8 2999.89 1671.07   2
   1  -8  -8 2621.24 1588.65   4
  -1   8  -9 63098.7 7186.85   2
   1  -8  -9 50179.1 7731.10   4
  -1   8 -10 75450.9 8091.82   2
   1   9 -12 26158.4 5689.78   2
   1   9 -11 41570.4 6679.99   2
   1   9 -10 1378.16 1386.33   2
  -1  -9  -9 46123.0 7649.74   4
   1   9  -9 60178.7 7555.00   2
   1   9  -8 31976.4 4874.64   2
  -1  -9  -8 29769.2 6346.66   4
  -1  -9  -7 81159.9 10492.5   4
   1   9  -7 89067.3 7832.64   2
  -1  -9  -6 161.874 911.140   4
   1   9  -6 930.336 587.149   2
   1   9  -5 76394.2 6556.36   2
  -1  -9  -5 62908.4 9605.52   4
   1   9  -4 89837.6 7881.99   3
  -1  -9  -4 80133.2 10650.7   4
  -1  -9  -3 77789.2 9961.34   4
   1   9  -3 78005.0 6671.60   3
  -1  -9  -2 4096.95 2475.25   4
   1   9  -2 3355.54 1501.23   3
  -1   9   2 2976.44 1091.68   3
  -1   9   1 78623.8 5956.43   3
   1   9  -1 80926.8 6363.46   3
  -1  -9  -1 83466.5 10015.3   4
   1   9   0 47471.5 4794.22   3
  -1   9   0 45859.8 4638.99   3
  -1   9  -1 85143.1 6346.87   3
   1   9   1 78825.5 6010.80   3
  -1   9  -2 1269.67 860.188   3
   1  -9  -2 3457.29 2167.69   4
   1   9   2 2229.31 826.593   3
   1  -9  -3 69046.4 9662.01   4
  -1   9  -3 74443.2 6316.52   3
  -1   9  -4 81825.9 7286.42   3
  -1   9  -4 85489.7 6164.18   2
   1  -9  -4 79194.8 10407.9   4
  -1   9  -5 75850.3 6123.73   2
   1  -9  -5 73997.5 10581.0   4
   1  -9  -6 860.353 238.669   4
  -1   9  -6 234.884 417.292   2
   1  -9  -7 82310.5 10622.2   4
  -1   9  -7 88656.3 7285.02   2
  -1   9  -8 35949.1 5220.08   2
   1  -9  -8 26686.0 5786.47   4
   1  -9  -9 52187.1 8147.40   4
  -1   9  -9 63147.5 6960.68   2
   1  10 -11 6128.43 2517.28   2
  -1 -10 -10 111978. 13356.0   4
   1  10 -10 117547. 11279.1   2
  -1 -10  -9 613.180 1499.72   4
   1  10  -9 2135.47 1335.48   2
  -1 -10  -8 2970.27 1999.25   4
   1  10  -8 970.780 636.199   2
  -1 -10  -7 337.337 1175.61   4
   1  10  -7 1869.33 1114.16   2
  -1 -10  -6 157966. 16158.3   4
   1  10  -6 170006. 11002.6   2
  -1 -10  -5 15078.0 4978.43   4
   1  10  -5 13411.6 2991.62   2
   1  10  -4 3829.06 1678.53   3
  -1 -10  -4 1839.63 1996.01   4
  -1 -10  -3 13492.2 4269.84   4
  -1  10   3 13129.2 2481.91   3
   1  10  -3 13668.9 2943.59   3
  -1 -10  -2 163458. 15539.0   4
  -1  10   2 144941. 8645.42   3
   1  10  -2 188066. 10744.0   3
   1  10  -1 1091.34 860.083   3
  -1  10   1 1230.48 809.174   3
  -1 -10  -1 1335.61 1003.16   4
  -1  10   0 4920.71 1625.21   3
   1  10   0 4757.89 1601.86   3
   1  10   1 398.431 465.558   3
   1 -10  -1-181.405 2036.45   4
  -1  10  -1 585.950 347.654   3
  -1  10  -2 172841. 10152.5   3
   1  10   2 160465. 9282.21   3
   1 -10  -2 170370. 16022.2   4
  -1  10  -3 15051.9 3025.05   3
   1 -10  -3 11166.7 4118.49   4
   1 -10  -4 5153.77 3313.23   4
  -1  10  -4 1684.54 776.192   3
   1 -10  -5 22876.2 6387.98   4
  -1  10  -5 19722.7 3181.42   2
   1 -10  -6 156742. 16152.7   4
  -1  10  -6 190665. 10937.6   2
   1 -10  -7 1681.10 1229.66   4
  -1  10  -7 1830.21 306.897   2
   1 -10  -8 3179.38 2395.70   4
   1 -10  -9 984.197 904.564   4
   1  11 -10 2782.50 1509.15   2
   1  11  -9 65551.2 8061.08   2
  -1 -11  -9 53321.6 9307.10   4
   1  11  -8 3467.63 1686.26   2
  -1 -11  -8 7229.15 3673.02   4
  -1 -11  -7 51143.9 9579.23   4
   1  11  -7 59072.6 6826.19   2
  -1 -11  -6-174.874 1416.33   4
   1  11  -6 2114.31 1210.73   2
  -1 -11  -5 84933.4 13191.3   4
   1  11  -5 72456.5 7175.91   2
  -1  11   4 453.159 395.699   3
   1  11  -4-429.396 1236.79   3
  -1 -11  -4-5.40561 1610.33   4
  -1  11   3 78233.2 6870.26   3
  -1 -11  -3 79376.7 11910.1   4
   1  11  -3 88473.7 8007.71   3
  -1 -11  -2 3133.06 2363.12   4
  -1  11   2 3056.27 1243.40   3
   1  11  -2 4754.70 1860.07   3
   1  11  -1 77517.2 7163.26   3
  -1  11   1 77038.1 6885.20   3
  -1 -11  -1 78771.6 11777.6   4
  -1 -11   0 2977.77 2214.18   4
   1  11   0 6280.57 1999.93   3
  -1  11   0 5406.93 1919.36   3
   1  11   1 79544.3 7221.58   3
   1 -11  -1 73607.9 11571.6   4
  -1  11  -1 79056.2 7030.11   3
   1 -11  -2 4580.38 2913.22   4
  -1  11  -2 3634.49 1576.98   3
   1  11   2 3410.61 1257.15   3
  -1  11  -3 90989.8 7865.19   3
   1  11   3 76749.4 6780.17   3
   1 -11  -3 80520.5 12077.8   4
   1 -11  -4 425.068 1339.58   4
  -1  11  -4 1232.61 1063.70   3
  -1  11  -4 1067.57 752.417   2
  -1  11  -5 81260.7 6897.38   2
   1 -11  -5 82168.8 13015.2   4
   1 -11  -6 3648.63 2200.04   4
   1 -11  -7 50834.4 9536.94   4
   1 -11  -8 4705.94 2884.45   4
   1 -11  -9 49521.2 8747.41   4
   1 -11 -10 1274.64 2496.12   4
   1  12  -8 2477.80 1347.79   2
  -1 -12  -7 6930.80 3401.78   4
   1  12  -7 10682.6 2997.50   2
   1  12  -6 96973.6 8939.75   2
  -1 -12  -6 89691.5 14359.7   4
  -1 -12  -5 9295.94 5034.93   4
  -1  12   5 4054.42 1610.07   3
   1  12  -5 3820.18 1723.83   2
  -1 -12  -4 2916.32 2563.16   4
  -1  12   4 246.093 128.688   3
   1  12  -3 1522.85 1034.12   3
  -1 -12  -3 3385.21 2399.96   4
  -1  12   3 1720.35 936.721   3
  -1 -12  -2 102207. 14813.2   4
   1  12  -2 115741. 9479.77   3
  -1  12   2 111342. 8961.64   3
  -1 -12  -1 9704.26 4322.37   4
   1  12  -1 11527.0 2937.91   3
  -1  12   1 10383.3 2665.57   3
   1 -12   0 914.912 1194.70   4
  -1 -12   0 6403.74 3860.52   4
   1  12   0 3467.27 1556.83   3
  -1  12   0 5014.81 1914.99   3
   1 -12  -1 13274.5 5040.94   4
  -1  12  -1 12225.2 2984.16   3
   1  12   1 11128.5 2825.30   3
  -1  12  -2 117017. 9387.71   3
   1  12   2 117622. 9432.82   3
   1 -12  -2 114140. 15496.7   4
   1 -12  -3 1513.35 1006.12   4
  -1  12  -3 2645.60 1606.87   3
   1  12   3 3132.76 1422.03   3
  -1  12  -4 1655.26 283.399   3
   1  12   4 1384.65 743.488   3
   1 -12  -5 5946.85 4203.26   4
   1 -12  -6 87106.6 13763.7   4
   1 -12  -7 8260.51 4331.39   4
   1 -12  -8 2471.95 2488.43   4
   1  13  -6 1147.32 1053.62   2
   1  13  -5 25927.2 4628.62   2
  -1  13   4 33567.0 5141.89   3
   1  13  -4 36407.0 5427.91   2
  -1 -13  -3 21942.6 7908.44   4
  -1  13   3 23695.9 4362.93   3
   1  13  -3 27212.2 5245.46   3
   1  13  -2 468.059 317.716   3
  -1  13   2-501.446 624.813   3
  -1  13   1 37175.5 5456.12   3
   1  13  -1 42246.2 6121.86   3
  -1 -13  -1 33921.6 9394.97   4
  -1  13   0 31036.6 5034.54   3
  -1 -13   0 30231.4 8729.10   4
   1 -13   0 27648.5 8273.29   4
   1  13   0 26006.6 4730.14   3
   1 -13  -1 49754.3 11498.3   4
  -1  13  -1 40576.7 6045.18   3
   1  13   1 43366.7 5971.81   3
  -1 -13   1 37505.6 9842.06   4
   1 -13  -2-235.104 1942.25   4
  -1  13  -2 408.263 751.725   3
   1  13   2-142.707 821.572   3
   1  13   3 25133.0 4584.50   3
  -1  13  -3 26654.1 4887.49   3
   1 -13  -3 19509.9 6866.90   4
   1 -13  -4 28471.2 8889.44   4
  -1  13  -4 39585.1 6458.07   3
   1  13   4 32440.0 5233.65   3
   1  13   5 22925.1 4386.32   3
   1 -13  -5 27444.8 8579.30   4
   1 -13  -6 2742.53 2792.61   4
   1  14  -3 32515.5 6038.82   3
   1  14  -2 29616.0 5378.84   3
   1  14  -1 14951.5 3776.53   3
   1  14   0 13.3913 939.240   3
   1  14   1 13190.2 3546.11   3
   1  14   2 26045.4 4968.38   3
  -2   0   0 557335. 5983.58   3
   2   0   0 515609. 7757.98   4
   2   0   1 6730.67 1086.88   4
   2   0  -1 6587.48 1300.91   2
  -2   0   1 6363.33 1161.36   2
   2   0   1 5442.19 916.157   3
   2   0  -2 15967.5 2822.61   2
  -2   0   2 13297.9 2255.67   2
  -2   0   3 928.226 758.953   2
   2   0  -3 2474.81 607.836   1
   2   0   3 1372.22 635.992   2
   2   0  -3 1090.35 811.194   2
   2   0   4 406483. 13725.2   2
   2   0  -4 397381. 7291.85   1
   2   0  -5 2781.46 1271.52   2
   2   0   5 805.336 917.377   2
   2   0  -6 25405.0 4927.08   2
   2   0  -7 8916.53 2601.66   2
   2   0   8 548348. 14255.6   1
   2   0  -8 757880. 25901.7   2
   2   0   9 3178.25 1061.90   1
   2   0  -9 6688.62 2556.06   2
   2   0  10 279.250 418.805   1
   2   0 -10-298.425 1491.37   2
   2   0 -11 2857.34 1851.66   2
   2   0 -12 227143. 16200.9   2
   2   0 -13 3286.89 2261.94   2
   2   0 -14 4806.84 2539.92   2
   2   1 -14 24955.7 5372.60   2
   2   1 -13 73613.6 9520.34   2
   2   1 -12 3543.44 1872.35   2
   2   1 -11 154836. 12108.3   2
   2   1 -10 32957.8 5714.91   2
   2  -1  10 37207.3 4488.35   1
   2  -1   9 271043. 11971.2   1
   2   1  -9 309136. 17536.1   2
   2  -1   8 13824.2 2419.65   1
   2   1  -8 20927.5 4649.21   2
   2  -1   7 328952. 11502.8   1
   2   1  -7 445315. 21176.4   2
   2   1  -6 37253.3 5846.00   2
   2  -1   6 39961.3 3863.25   1
   2   1  -5 194243. 13069.8   2
   2  -1   5 168036. 7550.14   1
  -2   1   4 3732.19 794.996   1
   2   1  -4 3477.62 1521.23   2
   2  -1   4 4557.79 1955.64   2
  -2   1   4 5014.50 1086.69   4
   2  -1   4 3983.70 1130.21   1
   2  -1   3 301501. 9626.43   1
  -2   1   3 250021. 6450.24   1
   2   1  -3 294922. 12453.8   2
  -2   1   3 298259. 6181.10   4
   2  -1   3 234934. 9654.99   2
  -2   1   2 45709.5 5036.07   2
   2  -1   2 48751.9 3818.73   3
   2   1  -2 64643.6 4936.23   2
  -2  -1  -2 57547.2 3532.76   4
  -2   1   2 53056.1 3155.32   1
   2  -1   2 49048.1 2757.71   2
   2  -1   2 63582.7 4286.09   1
  -2   1   2 58988.9 2202.48   4
   2   1  -1 742070. 13539.4   2
  -2  -1  -1 706824. 11397.2   4
   2  -1   1 809338. 14689.9   1
  -2   1   1 744675. 12595.5   1
   2  -1   1 727870. 11385.7   3
  -2   1   1 651097. 14114.5   2
  -2  -1   0 25661.1 1940.84   4
  -2   1   0 29305.7 1704.81   3
   2  -1   0 34640.5 3017.85   1
  -2   1   0 34326.5 1831.00   2
  -2   1   0 30875.6 2713.31   1
   2   1   1 673346. 13007.4   4
  -2   1  -1 649318. 9932.25   3
   2   1   2 56734.8 4285.29   4
  -2  -1   2 49734.6 4177.00   2
   2  -1  -3 209465. 11084.6   2
  -2  -1   3 197646. 10384.4   2
   2  -1  -4 3264.87 1443.18   2
   2   1   4 5827.95 1789.27   2
  -2   1  -4 4676.16 1244.42   2
   2  -1  -5 149863. 10347.5   2
  -2   1  -5 166931. 8055.03   2
   2  -1  -6 58776.5 6787.45   2
  -2   1  -6 45450.8 4678.98   2
   2  -1  -7 379260. 18050.0   2
  -2   1  -7 369852. 14311.7   2
   2  -1  -8 15352.1 3766.93   2
  -2   1  -8 14178.4 2900.29   2
   2  -1  -9 338881. 18392.6   2
  -2   1  -9 304228. 14398.6   2
  -2   1 -10 32188.5 5142.52   2
   2   1  10 27845.2 3227.71   1
  -2   1 -11 159445. 11862.9   2
   2  -1 -11 156560. 13429.6   2
   2  -1 -12 4195.04 1118.40   2
  -2   1 -12 6956.66 2245.16   2
   2  -1 -13 98220.6 11464.2   2
   2  -1 -14 44781.2 7818.57   2
   2   2 -14 2056.19 1921.40   2
   2   2 -13 38656.4 6335.87   2
   2   2 -12 223304. 14694.1   2
   2   2 -11 39324.6 6092.35   2
   2   2 -10 1439.82 771.935   2
   2   2  -9 50440.6 7236.14   2
   2   2  -8 295332. 17343.6   2
  -2   2   8 186015. 4709.19   1
   2   2  -7 109178. 10364.9   2
  -2   2   7 87049.8 3966.32   1
   2   2  -6 5124.50 2043.62   2
   2   2  -5 102772. 8656.62   2
  -2   2   5 91292.6 5406.49   4
   2  -2   5 104622. 7255.44   1
  -2   2   4 427002. 10466.4   4
   2   2  -4 425971. 15398.8   2
   2   2  -3 89748.3 6373.76   2
   2  -2   3 45813.5 3538.96   2
   2  -2   3 108650. 7087.41   1
  -2  -2  -3 68602.0 4593.34   4
  -2   2   3 61718.7 6941.14   2
  -2   2   3 86698.3 3878.34   4
  -2   2   2 4653.63 1523.66   2
  -2  -2  -2 7451.27 1470.31   4
   2  -2   2 7441.81 1512.44   3
  -2   2   2 6980.94 1318.48   1
  -2   2   1 70903.1 4747.78   2
  -2   2   1 62859.3 4192.93   1
  -2  -2  -1 66718.9 4348.36   4
  -2   2   0 337396. 7092.53   2
  -2  -2   0 387433. 9174.25   4
  -2   2   0 376219. 7010.05   3
  -2   2   0 313381. 9278.83   1
  -2   2  -1 73575.2 3546.06   3
  -2   2  -1 63066.6 4026.72   1
   2   2   1 73840.4 4512.60   4
  -2  -2   1 63397.3 1629.11   3
  -2  -2   2 7938.59 1036.95   3
   2  -2  -2 6838.70 1097.52   4
  -2   2  -2 5964.60 1227.53   3
   2   2   2 7744.24 1691.86   4
  -2   2  -2 5710.09 1250.51   1
   2  -2  -2 10999.3 2203.25   2
  -2   2  -3 73340.8 3645.03   2
   2  -2  -3 75133.8 3917.36   4
  -2   2  -4 433364. 10676.3   2
   2  -2  -4 425152. 16742.6   2
  -2   2  -5 99128.5 5756.41   2
   2  -2  -5 92481.8 8430.92   2
   2  -2  -6 1278.03 1389.16   2
  -2   2  -6 2095.40 939.879   2
  -2   2  -7 125621. 7683.06   2
   2  -2  -7 111488. 10449.6   2
  -2   2  -8 374767. 14270.1   2
   2  -2  -8 272346. 17470.4   2
   2  -2  -9 45326.5 7944.46   2
  -2   2  -9 60444.8 6168.53   2
   2  -2 -10 958.579 1104.37   2
  -2   2 -10 2024.29 706.466   2
   2  -2 -11 48908.5 7989.82   2
  -2   2 -11 51340.0 6192.11   2
  -2   2 -12 282988. 15156.9   2
   2  -2 -12 215308. 17087.7   2
  -2   2 -13 54338.9 6907.75   2
   2  -2 -13 55448.3 9568.07   2
   2  -2 -14 1000.49 776.014   2
  -2   2 -14-637.881 1307.08   2
   2   3 -14 124554. 11139.6   2
   2   3 -13 79837.9 8689.41   2
   2   3 -12 1738.82 1427.72   2
   2   3 -11 89810.2 9918.90   2
   2   3 -10 194866. 14789.5   2
   2   3  -9 40747.3 6300.23   2
   2   3  -8 2908.45 1632.02   2
   2   3  -7 90925.0 9074.74   2
   2   3  -6 338044. 16393.2   2
  -2  -3  -5 196298. 9640.16   4
   2   3  -5 271306. 12897.1   2
  -2  -3  -4 2367.69 1006.89   4
  -2   3   4 1795.77 714.837   4
   2   3  -4 1467.44 877.031   2
  -2  -3  -3 120799. 7067.66   4
   2   3  -3 163141. 8269.98   2
  -2  -3  -2 368997. 12585.4   4
  -2   3   2 320914. 11807.6   2
   2   3  -1 97853.0 3657.04   3
   2  -3   1 101340. 5260.37   3
  -2  -3  -1 86491.3 5472.63   4
  -2   3   1 81841.3 5258.91   2
  -2   3   0 3977.26 893.773   3
  -2   3  -1 78615.8 3957.92   3
  -2   3  -2 371414. 9557.26   3
  -2  -3   2 391707. 7351.59   3
   2  -3  -2 376948. 10148.6   4
  -2  -3   3 151810. 5872.77   3
   2  -3  -3 130362. 6442.29   4
  -2   3  -4 1523.94 700.712   2
   2  -3  -4 787.975 415.143   4
   2  -3  -4 2773.58 1641.70   2
  -2   3  -5 341215. 11749.7   2
   2  -3  -5 301061. 15739.0   2
  -2   3  -6 392065. 12748.4   2
   2  -3  -6 373269. 18680.6   2
  -2   3  -7 111642. 6934.58   2
   2  -3  -7 92268.8 9857.40   2
   2  -3  -8 2343.88 1898.06   2
  -2   3  -8 1412.78 1097.05   2
  -2   3  -9 58742.1 5664.77   2
   2  -3  -9 44218.6 7432.02   2
  -2   3 -10 213455. 11513.0   2
   2  -3 -10 173407. 15958.9   2
   2  -3 -11 75203.0 10549.2   2
  -2   3 -11 117829. 9150.49   2
  -2   3 -12 3705.99 1645.08   2
  -2   3 -13 94603.7 8809.58   2
  -2   3 -14 140062. 11336.4   2
   2   4 -14-660.692 1302.04   2
   2   4 -13 88203.6 9299.79   2
   2   4 -12 73240.1 9088.63   2
   2   4 -11 106173. 10951.9   2
   2   4 -10 8274.04 3027.07   2
   2   4  -9 137954. 12141.2   2
   2   4  -8 35403.2 5762.45   2
   2   4  -7 178324. 12572.0   2
  -2  -4  -6 13053.0 2797.19   4
   2   4  -6 12213.5 2976.91   2
  -2  -4  -5 198611. 10491.6   4
   2   4  -5 264805. 12261.2   2
   2   4  -4 142832. 8610.42   2
  -2  -4  -4 108049. 7708.30   4
  -2  -4  -3 196093. 10335.7   4
   2   4  -3 249592. 10348.4   2
  -2  -4  -2 15414.0 2732.74   4
   2   4  -2 16832.3 2075.48   3
  -2   4   2 13553.9 2653.49   2
   2   4  -1 250541. 6774.95   3
  -2  -4  -1 225621. 9980.64   4
  -2   4   0 15906.4 1834.06   3
   2   4   0 18641.3 1678.83   3
  -2   4  -1 222489. 7262.42   3
   2  -4  -2 14564.5 2345.79   4
  -2   4  -2 13565.1 1957.94   3
  -2  -4   2 11920.1 1421.35   3
  -2   4  -3 231194. 9178.75   3
   2  -4  -3 219711. 10152.0   4
  -2  -4   3 222353. 7284.14   3
  -2   4  -4 154753. 7075.15   2
   2  -4  -4 110452. 7005.33   4
   2  -4  -5 177998. 8881.15   4
  -2   4  -5 284312. 10939.4   2
  -2   4  -6 20191.6 3102.97   2
  -2   4  -7 205380. 10389.5   2
  -2   4  -8 38023.1 4408.32   2
  -2   4  -9 177626. 9721.48   2
  -2   4 -10 10289.4 2492.49   2
  -2   4 -11 122624. 8761.39   2
  -2   4 -12 93479.7 8087.51   2
  -2   4 -13 105836. 9375.06   2
   2   5 -14 125183. 11304.6   2
   2   5 -13 3312.18 1105.50   2
   2   5 -12 3705.67 2512.68   2
   2   5 -11 19415.4 4580.46   2
   2   5 -10 257935. 16490.4   2
   2   5  -9 10895.3 3423.81   2
   2   5  -8 12702.2 3599.99   2
  -2  -5  -7 6671.74 2226.58   4
   2   5  -7 11916.3 3282.58   2
  -2  -5  -6 300980. 13989.5   4
   2   5  -6 433063. 16612.9   2
  -2  -5  -5 12375.1 2936.37   4
   2   5  -5 19034.8 3406.00   2
  -2  -5  -4 7466.62 2218.54   4
   2   5  -4 8865.28 2135.14   2
  -2  -5  -3 41459.9 5446.05   4
   2   5  -2 520304. 12189.1   3
  -2  -5  -2 453668. 16431.2   4
  -2  -5  -1 5654.44 1839.75   4
   2   5  -1 6192.73 1208.39   3
  -2   5   0 5872.17 1255.31   3
   2   5   0 8315.62 1349.41   3
  -2   5  -1 3510.40 1048.69   3
  -2   5  -2 502400. 12654.1   3
   2  -5  -2 500760. 15726.9   4
   2  -5  -3 34444.9 4351.29   4
  -2   5  -3 42594.1 3932.60   3
  -2   5  -3 44528.5 3061.06   2
   2  -5  -4 5625.85 1904.26   4
  -2   5  -4 9169.67 1586.07   2
   2  -5  -5 13878.8 2864.53   4
  -2   5  -5 22302.5 2972.49   2
  -2   5  -6 461097. 15561.9   2
   2  -5  -6 277869. 12355.5   4
  -2   5  -7 7555.03 2091.77   2
  -2   5  -8 16835.1 3275.49   2
  -2   5  -9 9239.59 2159.04   2
  -2   5 -10 296446. 12895.2   2
  -2   5 -11 21778.8 3574.67   2
  -2   5 -12 585.045 897.219   2
   2   6 -13 67371.3 8869.43   2
   2   6 -12 4571.32 2419.88   2
   2   6 -11 88100.7 10003.2   2
   2   6 -10 7324.62 2779.31   2
   2   6  -9 138929. 12329.7   2
  -2  -6  -8 10904.2 3104.06   4
   2   6  -8 19703.6 4241.61   2
  -2  -6  -7 90360.4 8269.80   4
   2   6  -7 128518. 9562.09   2
  -2  -6  -6 188.896 713.764   4
   2   6  -6 736.730 885.344   2
  -2  -6  -5 143187. 10662.8   4
   2   6  -5 196741. 10956.3   2
  -2  -6  -4 6846.63 2337.95   4
   2   6  -4 14146.6 2704.88   2
  -2  -6  -3 150986. 10998.6   4
  -2  -6  -2 4941.78 2047.76   4
   2   6  -2 4338.38 1243.54   3
   2   6  -1 245931. 8516.18   3
  -2  -6  -1 233381. 12559.5   4
   2   6   0 6236.21 1339.11   3
  -2   6   0 5795.98 1267.09   3
  -2   6  -1 228079. 8556.95   3
   2  -6  -2 4801.92 1918.74   4
  -2   6  -2 3442.85 1120.14   3
   2  -6  -3 163531. 10595.0   4
  -2   6  -3 167853. 8115.58   3
   2  -6  -4 11572.2 2951.42   4
  -2   6  -4 10632.0 2223.21   3
  -2   6  -4 14733.2 2152.92   2
  -2   6  -5 183425. 8227.51   2
   2  -6  -5 145379. 10520.1   4
  -2   6  -6 1119.69 836.996   2
   2  -6  -6 1054.03 1063.36   4
   2  -6  -7 101481. 8665.38   4
  -2   6  -7 143496. 9439.61   2
  -2   6  -8 13759.1 2844.67   2
  -2   6  -9 180897. 11037.5   2
  -2   6 -10 3885.46 1234.09   2
   2   7 -13 17615.2 4530.92   2
   2   7 -12 2690.39 1708.93   2
   2   7 -11 33657.7 5957.56   2
   2   7 -10 201402. 14739.6   2
   2   7  -9 25508.1 5007.62   2
  -2  -7  -8 2304.84 1500.76   4
   2   7  -8 1631.99 935.263   2
   2   7  -7 9284.48 2478.89   2
  -2  -7  -7 8373.69 2875.94   4
   2   7  -6 217072. 12581.6   2
  -2  -7  -6 176832. 13160.2   4
   2   7  -5 50386.5 5591.65   2
  -2  -7  -5 38588.6 6246.15   4
  -2  -7  -4 10026.2 3198.41   4
   2   7  -4 9856.25 2365.01   2
   2   7  -3 39044.0 4343.75   3
  -2  -7  -3 31358.4 5352.72   4
   2   7  -2 289785. 10801.5   3
  -2  -7  -2 249793. 14790.8   4
   2   7  -1 24412.2 2950.47   3
  -2  -7  -1 22164.3 4195.50   4
  -2   7   1 20983.6 2695.04   3
  -2   7   0 2886.04 968.029   3
   2   7   0 4176.65 1295.52   3
   2   7   1 19182.0 2494.79   3
  -2   7  -1 19966.6 2731.73   3
  -2   7  -2 277850. 10627.3   3
   2  -7  -2 288786. 15201.1   4
   2  -7  -3 31808.2 5308.29   4
  -2   7  -3 34514.4 3827.59   3
   2  -7  -4 7171.24 2776.78   4
  -2   7  -4 7950.69 2011.96   3
  -2   7  -4 6023.94 1398.62   2
  -2   7  -5 40450.5 3874.46   2
   2  -7  -5 32679.7 5620.28   4
   2  -7  -6 145586. 11663.8   4
  -2   7  -6 207772. 10177.2   2
  -2   7  -7 12268.1 2726.38   2
   2  -7  -7 7617.50 2543.61   4
  -2   7  -8 872.390 724.286   2
   2  -7  -8 915.024 1068.33   4
  -2   7  -9 17618.7 3522.63   2
   2   8 -12 83801.6 9839.75   2
   2   8 -11 39850.0 6817.97   2
   2   8 -10 4525.97 2245.55   2
   2   8  -9 58918.7 7531.54   2
  -2  -8  -9 54481.9 8044.82   4
  -2  -8  -8 47928.0 7013.90   4
   2   8  -8 68906.3 7453.65   2
  -2  -8  -7 47438.3 7330.21   4
   2   8  -7 61475.8 6623.82   2
  -2  -8  -6 10201.3 3096.95   4
   2   8  -6 13850.3 3180.37   2
   2   8  -5 69087.2 6536.50   2
  -2  -8  -5 65088.4 8801.65   4
  -2  -8  -4 163697. 14358.7   4
  -2  -8  -3 69633.7 8796.08   4
   2   8  -3 82288.7 6704.43   3
  -2  -8  -2 11289.7 3507.18   4
   2   8  -2 11863.1 2414.13   3
  -2   8   2 7571.76 1646.29   3
   2   8  -1 71092.4 5495.03   3
  -2  -8  -1 64225.2 8130.10   4
  -2   8   1 57893.4 4729.31   3
  -2   8   0 85412.9 5983.31   3
   2   8   0 99992.5 6518.65   3
  -2   8  -1 61303.2 5127.80   3
   2   8   1 60955.1 4967.01   3
   2  -8  -2 9520.00 3066.79   4
  -2   8  -2 12512.1 2438.50   3
   2  -8  -3 64785.3 8324.97   4
  -2   8  -3 63169.0 5533.48   3
  -2   8  -4 162401. 9689.38   3
   2  -8  -4 147976. 13039.7   4
  -2   8  -4 177056. 7789.95   2
   2  -8  -5 65554.9 8581.39   4
  -2   8  -5 79702.5 5840.66   2
  -2   8  -6 12099.4 2305.35   2
   2  -8  -6 7000.48 2422.71   4
   2  -8  -7 50518.0 7308.28   4
  -2   8  -7 79314.1 6769.96   2
   2  -8  -8 52947.5 7178.89   4
   2   9 -11 69196.4 9019.31   2
   2   9 -10 35374.6 6316.53   2
  -2  -9  -9 27761.6 5831.88   4
   2   9  -9 36823.7 6018.23   2
   2   9  -8 1746.98 1239.81   2
  -2  -9  -8 5668.84 2664.24   4
  -2  -9  -7 40063.1 7383.16   4
   2   9  -7 47119.8 6094.23   2
  -2  -9  -6 54816.9 8533.66   4
   2   9  -6 63952.5 6877.88   2
  -2  -9  -5 94835.2 11560.9   4
   2   9  -5 121145. 8755.74   2
  -2  -9  -4 2991.20 2124.77   4
   2   9  -3 130511. 9007.65   3
  -2  -9  -3 112182. 11949.5   4
  -2  -9  -2 63377.4 8884.18   4
   2   9  -2 63227.8 5845.51   3
  -2   9   2 50612.3 4768.89   3
   2   9  -1 58806.4 5450.15   3
  -2  -9  -1 56658.2 8458.04   4
  -2   9   1 51086.3 4795.91   3
  -2   9   0 3420.65 1294.84   3
   2   9   0 2790.83 1185.83   3
  -2  -9   0 3670.11 2137.84   4
  -2   9  -1 57185.7 5191.49   3
   2   9   1 63958.7 5442.27   3
  -2   9  -2 47136.6 4994.36   3
   2   9   2 43515.0 4371.51   3
   2  -9  -2 48545.5 7881.06   4
   2  -9  -3 116221. 12270.2   4
  -2   9  -3 110821. 7676.27   3
   2  -9  -4 2422.33 2071.05   4
  -2   9  -4 1878.22 823.042   3
  -2   9  -4 3920.49 1221.72   2
  -2   9  -5 129086. 7658.38   2
   2  -9  -5 100842. 12241.6   4
   2  -9  -6 58422.4 8681.92   4
   2  -9  -7 40133.5 7014.47   4
   2  -9  -8 1052.36 1393.36   4
   2  -9  -9 37630.9 6853.56   4
   2  10 -10-96.6398 1449.52   2
  -2 -10  -9 3105.38 1657.09   4
   2  10  -9 2503.02 1083.35   2
   2  10  -8 110487. 9739.58   2
  -2 -10  -8 103774. 12314.1   4
  -2 -10  -7 5213.98 2841.85   4
   2  10  -7 2787.65 1664.56   2
  -2 -10  -6 1035.25 1909.73   4
   2  10  -6 1961.53 1419.54   2
  -2 -10  -5 9818.44 4010.64   4
   2  10  -5 8479.85 2420.36   2
  -2 -10  -4 203925. 18827.2   4
  -2 -10  -3 5187.17 2533.21   4
   2  10  -3 6699.06 1999.70   3
  -2  10   3 3977.23 1387.07   3
  -2 -10  -2 1725.74 1518.46   4
   2  10  -2 1784.31 889.772   3
  -2  10   2 1519.43 968.995   3
  -2 -10  -1 3435.40 1772.07   4
   2  10  -1 5189.25 1783.28   3
  -2  10   1 4617.73 1529.49   3
   2  10   0 152068. 9326.95   3
  -2  10   0 141271. 8695.19   3
  -2 -10   0 148782. 14708.2   4
   2  10   1 4787.82 1365.92   3
   2 -10  -1 3839.04 2453.77   4
  -2  10  -1 4208.07 1199.80   3
   2 -10  -2 1291.43 1631.59   4
  -2  10  -2 1215.77 1070.01   3
   2  10   2 2550.26 1265.93   3
   2 -10  -3 7951.89 3312.88   4
  -2  10  -3 7555.27 2281.88   3
  -2  10  -4 208500. 12194.7   3
  -2  10  -4 202052. 9323.93   2
   2 -10  -4 191722. 17620.0   4
   2 -10  -5 12489.5 4574.50   4
   2 -10  -6 4634.75 2386.88   4
   2 -10  -7 3178.51 1498.54   4
   2 -10  -8 91255.1 10975.7   4
   2 -10  -9 3394.33 2117.82   4
   2  11  -9 50338.7 7336.40   2
   2  11  -8-627.739 375.132   2
  -2 -11  -8 1286.11 2001.41   4
   2  11  -7 82900.9 8710.71   2
  -2 -11  -7 76984.6 11581.3   4
  -2 -11  -6 928.055 395.173   4
   2  11  -6 2308.49 1283.50   2
  -2 -11  -5 43510.2 9068.49   4
   2  11  -5 52842.4 6266.98   2
  -2  11   4 605.159 389.414   3
  -2 -11  -4 2333.50 1773.01   4
   2  11  -3 68347.3 7409.23   3
  -2  11   3 54960.4 5679.93   3
  -2 -11  -3 64484.3 10902.3   4
  -2 -11  -2-131.571 174.028   4
   2  11  -2 836.986 184.276   3
  -2  11   2 1312.46 1019.88   3
  -2 -11  -1 84026.3 12161.5   4
   2  11  -1 95654.3 8067.06   3
  -2  11   1 86117.8 7276.74   3
   2  11   0-105.601 563.731   3
  -2  11   0 289.435 563.676   3
  -2  11  -1 87654.9 7413.27   3
   2  11   1 94972.6 7806.86   3
   2 -11  -1 94388.5 13027.0   4
  -2  11  -2 1497.14 869.491   3
   2  11   2 628.907 472.655   3
   2 -11  -2 725.606 1346.52   4
   2 -11  -3 62502.0 10802.9   4
   2  11   3 59567.1 6139.22   3
  -2  11  -3 58444.5 6217.88   3
   2 -11  -4 148.032 1068.60   4
  -2  11  -4 1057.07 513.319   3
   2 -11  -5 54786.9 10646.3   4
   2 -11  -6 792.010 1561.54   4
   2 -11  -7 64553.7 10542.5   4
   2 -11  -8-868.597 1040.08   4
   2 -11  -9 39451.8 7570.35   4
   2  12  -7 6481.27 2416.65   2
  -2 -12  -6 3679.98 3052.33   4
   2  12  -6 3111.55 2142.18   2
  -2 -12  -5 8139.06 4056.28   4
  -2  12   5 6418.89 2084.31   3
   2  12  -5 6967.44 2216.52   2
  -2 -12  -4 72649.4 13211.5   4
  -2  12   4 55138.3 6173.58   3
  -2 -12  -3 5916.90 4147.48   4
   2  12  -3 6238.76 2318.77   3
  -2  12   3 5722.30 1878.29   3
  -2 -12  -2 5537.64 3814.37   4
   2  12  -2 2835.68 1259.61   3
  -2  12   2 4730.51 1490.30   3
  -2 -12  -1 3037.15 1754.28   4
   2  12  -1 4233.67 1865.90   3
  -2  12   1 4228.25 1847.26   3
   2  12   0 140946. 10233.1   3
  -2 -12   0 138537. 16849.6   4
  -2  12   0 130882. 9482.11   3
  -2 -12   1 4647.56 2867.50   4
   2 -12  -1 2859.41 2735.87   4
  -2  12  -1 2767.32 1591.46   3
   2  12   1 3455.72 1733.55   3
   2 -12  -2 8278.14 4150.99   4
  -2  12  -2 4001.24 1412.72   3
   2  12   2 4889.99 2193.59   3
   2 -12  -3 5164.64 3056.24   4
  -2  12  -3 7797.11 2175.66   3
   2  12   3 5789.84 1897.68   3
   2 -12  -4 57930.9 11433.6   4
  -2  12  -4 72618.3 8079.86   3
   2  12   4 54578.4 6243.73   3
   2 -12  -5 9771.24 4886.84   4
   2 -12  -6 1815.03 1008.62   4
   2 -12  -7 5264.05 2771.73   4
   2 -12  -8 87268.3 12836.8   4
   2 -12  -9 2445.35 2480.50   4
   2  13  -4 2335.31 1236.80   2
   2  13  -3 20213.8 4349.61   3
   2  13  -2 34073.9 5573.26   3
  -2  13   2 26616.6 4649.14   3
  -2  13   1 41261.1 5621.68   3
  -2 -13  -1 37380.1 9575.95   4
   2  13  -1 46310.0 6330.77   3
   2 -13   0 998.760 1621.89   4
  -2 -13   0 3807.02 3403.39   4
   2  13   0 2522.84 1427.89   3
  -2  13   0 1318.84 746.598   3
   2 -13  -1 39707.2 10132.1   4
  -2  13  -1 49146.2 6395.74   3
   2  13   1 45268.8 6207.33   3
  -2 -13   1 53437.6 11424.5   4
  -2  13  -2 32357.7 5146.49   3
   2  13   2 31758.2 5307.84   3
   2 -13  -2 29057.6 8563.90   4
   2 -13  -3 16464.4 6246.82   4
   2  13   3 16139.5 3712.69   3
   2 -13  -4 1685.21 1054.08   4
   2  13   4 732.181 775.432   3
   2 -13  -5 13544.8 6241.19   4
   2  13   5 14776.3 3599.39   3
   2 -13  -6 22522.5 7200.57   4
   2  13   6 30398.7 5260.31   3
   2  14   0 31651.7 5626.44   3
   2  14   1 25066.1 4911.17   3
   2  14   2 1134.04 321.514   3
   2  14   3 15380.1 3961.12   3
  -3   0   0 1546.39 411.891   3
   3   0   0 1852.07 567.313   4
   3   0   1 9387.83 1607.00   4
   3   0   1 9508.55 1245.39   3
  -3   0   1 8572.04 736.485   4
   3   0  -1 9202.56 1787.18   2
  -3   0   1 8284.92 697.200   3
   3   0  -2 645621. 19144.2   2
  -3   0   2 573310. 14853.3   2
   3   0  -3 4316.81 1129.28   1
   3   0  -3 5943.12 2127.55   2
   3   0   3 6138.18 1670.51   4
   3   0  -4 2732.38 757.262   1
   3   0  -4 2392.70 1622.85   2
   3   0   4 2665.73 1143.58   2
   3   0  -5 1812.75 1457.39   2
   3   0  -5 2331.57 702.367   1
   3   0   5 3476.64 1416.41   2
   3   0  -6 473212. 23078.8   2
   3   0  -7 9169.58 3157.00   2
   3   0  -8 2504.41 2000.36   2
   3   0   8 1800.40 938.226   1
   3   0   9 10665.5 2162.94   1
   3   0  -9 18053.2 4217.71   2
   3   0  10 299577. 11968.2   1
   3   0 -10 463818. 22144.1   2
   3   0  11 2779.54 1122.93   1
   3   0 -11 4528.10 2034.40   2
   3   0 -12 755.905 765.873   2
   3   0 -13-153.156 864.735   2
   3   0 -14 175460. 15750.2   2
   3   1 -14 3800.98 2159.13   2
   3   1 -13 109046. 11102.8   2
   3   1 -12 28828.7 5551.97   2
   3  -1  11 144685. 10270.0   1
   3   1 -11 159718. 13017.1   2
   3  -1  10 4558.86 1463.22   1
   3   1 -10 5122.41 2521.31   2
   3  -1   9 198551. 10503.3   1
   3   1  -9 264204. 17165.4   2
   3   1  -8 18660.0 5148.77   2
   3  -1   8 22374.0 3389.68   1
   3   1  -7 212170. 15329.0   2
   3  -1   7 181802. 9247.13   1
  -3   1   6 10678.9 1798.63   4
   3  -1   6 10002.7 2150.86   1
   3   1  -6 6214.87 940.223   1
   3   1  -6 12008.2 3548.19   2
   3  -1   5 230078. 10033.6   1
  -3   1   5 248064. 7374.45   4
   3   1  -5 254703. 15413.5   2
  -3   1   4 86440.7 3493.39   4
   3  -1   4 89730.1 6220.88   1
   3   1  -4 87264.4 8346.60   2
   3  -1   3 223785. 10427.4   3
  -3   1   3 299542. 5263.18   4
   3   1  -3 283849. 12793.9   2
   3  -1   3 258362. 7914.93   2
   3  -1   3 325837. 11913.7   1
  -3   1   2 22295.8 3084.50   2
   3  -1   2 28332.4 3489.52   1
   3   1  -2 25643.5 3466.73   2
   3  -1   2 22682.4 2665.43   3
   3  -1   1 399542. 12529.6   1
   3  -1   1 276416. 6262.11   2
   3  -1   1 402765. 9326.64   3
  -3   1   1 341922. 9389.39   2
   3   1  -1 337918. 10415.6   2
  -3  -1  -1 350494. 8407.55   4
  -3  -1   0 34019.2 2512.18   4
   3  -1   0 34440.6 3601.34   1
  -3   1   0 30484.9 1922.67   3
  -3   1  -1 312759. 7717.44   3
   3   1   1 297149. 9429.89   4
  -3  -1   1 297674. 6657.00   4
   3  -1  -2 18766.5 3463.65   2
   3  -1  -2 28078.2 3088.66   1
   3  -1  -3 267733. 9949.74   1
   3  -1  -3 241870. 14025.7   2
   3  -1  -4 87491.0 8753.77   2
   3  -1  -5 240301. 14601.8   2
   3  -1  -6 8507.84 2653.74   2
   3  -1  -7 228039. 14759.4   2
   3  -1  -8 36130.5 6061.21   2
   3  -1  -9 247388. 16143.7   2
   3  -1 -10 8111.20 3150.49   2
   3   1  11 101839. 7122.97   1
   3  -1 -11 163515. 14547.6   2
   3  -1 -12 38252.0 7866.43   2
   3  -1 -13 112167. 13348.9   2
   3  -1 -14 2789.28 2803.42   2
   3   2 -14 145902. 12975.3   2
   3   2 -13 42353.3 6765.03   2
   3   2 -12 5481.33 2485.25   2
   3   2 -11 81324.6 9821.56   2
   3   2 -10 242543. 17118.3   2
   3   2  -9 19679.2 4922.79   2
   3   2  -8 3848.25 2124.24   2
   3  -2   8 3571.58 1520.44   1
   3   2  -7 34677.9 6356.57   2
   3  -2   7 32013.7 4742.49   1
   3   2  -6 413992. 19925.2   2
   3  -2   6 477840. 17798.8   1
  -3   2   5 102878. 5072.58   1
  -3   2   5 125782. 5872.15   4
   3   2  -5 136732. 10750.0   2
   3  -2   5 161205. 10171.7   1
  -3   2   4 8114.67 1447.65   1
   3  -2   4 4519.53 1454.13   2
   3   2  -4 9603.75 2397.96   2
  -3   2   4 12013.3 1439.55   4
   3  -2   4 16720.1 3125.54   1
  -3   2   3 130183. 5917.29   1
   3  -2   3 68015.0 3261.75   2
   3   2  -3 186475. 10338.5   2
   3  -2   3 213764. 11110.2   1
  -3  -2  -3 128025. 6224.82   4
  -3  -2  -2 339810. 10436.6   4
  -3   2   2 300499. 13537.1   2
  -3  -2  -1 30940.0 3084.26   4
   3  -2   1 35822.9 3102.72   3
  -3   2   1 37328.7 3668.59   2
  -3  -2   0 448.778 334.135   4
  -3   2   0 1037.63 378.167   2
  -3   2   0 374.106 227.027   3
   3  -2   0 327.595 376.905   1
   3  -2   0 1183.98 566.693   2
  -3   2  -1 39874.6 2783.63   3
   3  -2  -1 50672.4 4092.74   2
   3   2   1 42740.6 3837.07   4
   3  -2  -2 312445. 5550.97   4
  -3  -2   2 329721. 4965.40   3
   3  -2  -3 160994. 9759.40   2
   3  -2  -4 17707.4 3491.79   2
   3  -2  -5 129073. 10215.4   2
   3  -2  -6 350182. 17817.0   2
   3  -2  -7 20073.7 4839.02   2
  -3   2  -7 23723.9 3357.08   2
  -3   2  -8 1632.48 841.996   2
   3  -2  -8 2912.50 1414.95   2
   3  -2  -9 30026.7 6571.41   2
  -3   2  -9 34200.4 4601.38   2
   3  -2 -10 212020. 16587.6   2
   3  -2 -11 89039.6 11603.0   2
   3  -2 -12 13381.9 4553.93   2
   3  -2 -13 69028.6 10087.9   2
   3  -2 -14 161223. 16269.1   2
   3   3 -14 3744.86 2069.26   2
   3   3 -13 52541.3 7535.40   2
   3   3 -12 182224. 14427.9   2
   3   3 -11 60488.1 8836.65   2
   3   3 -10 7132.31 2791.01   2
   3   3  -9 55653.7 7862.90   2
   3   3  -8 153961. 13451.6   2
   3   3  -7 74215.0 8411.16   2
  -3   3   7 42419.5 3422.21   1
   3   3  -6 12388.0 3379.51   2
   3  -3   6 2376.19 1155.02   2
  -3   3   5 151177. 6536.69   4
   3   3  -5 155350. 10379.1   2
  -3  -3  -4 298042. 11091.5   4
   3   3  -4 473106. 17321.5   2
  -3  -3  -3 107879. 6842.07   4
   3   3  -3 146762. 8719.97   2
  -3  -3  -2 15994.0 2549.39   4
  -3   3   2 15089.6 3140.77   2
  -3   3   1 74328.1 5834.05   2
  -3   3   1 67554.3 3315.49   3
  -3  -3  -1 76732.3 5444.19   4
  -3   3   0 254998. 7146.14   3
   3   3   0 281961. 4753.80   3
  -3  -3   0 251158. 9208.66   4
  -3   3   0 288635. 8702.43   2
  -3   3  -1 72267.9 3984.05   3
  -3  -3   2 19202.8 1239.26   3
   3  -3  -2 19475.7 2080.20   4
  -3   3  -2 19941.7 2351.77   3
  -3  -3   3 133757. 4751.56   3
   3  -3  -3 162053. 9923.52   2
   3  -3  -4 527960. 19937.5   2
  -3   3  -4 412547. 8909.51   2
   3  -3  -5 194291. 13260.0   2
  -3   3  -5 166662. 6823.95   2
   3  -3  -6 11163.9 3472.55   2
  -3   3  -6 6058.06 1536.99   2
   3  -3  -7 85399.4 10001.2   2
  -3   3  -7 104260. 6816.47   2
   3  -3  -8 169806. 14510.1   2
  -3   3  -8 199542. 10050.1   2
  -3   3  -9 89982.4 7125.44   2
   3  -3  -9 46575.2 7645.62   2
  -3   3 -10 11400.9 2568.32   2
   3  -3 -10 5243.96 2486.99   2
  -3   3 -11 58442.5 6438.10   2
   3  -3 -11 49200.6 8741.89   2
  -3   3 -12 242225. 13855.0   2
   3  -3 -12 253420. 20029.9   2
   3  -3 -13 63302.3 10727.3   2
   3   4 -13 69852.3 8955.39   2
   3   4 -12 3949.06 2508.67   2
   3   4 -11 96000.8 10949.1   2
   3   4 -10 41357.4 6822.34   2
   3   4  -9 102988. 11117.6   2
   3   4  -8 6273.82 2653.23   2
   3   4  -7 182959. 13315.5   2
  -3  -4  -6 44721.5 5246.63   4
   3   4  -6 58411.4 6718.13   2
   3   4  -5 200259. 11529.4   2
  -3  -4  -5 139392. 8566.59   4
  -3  -4  -4 6088.63 1756.68   4
   3   4  -4 9142.41 2469.92   2
  -3  -4  -3 169023. 9729.13   4
   3   4  -3 206620. 10272.3   2
  -3  -4  -2 89318.5 7097.41   4
  -3   4   2 77189.9 6254.78   2
  -3  -4  -1 171705. 8933.70   4
  -3   4   1 143599. 5292.11   3
   3   4  -1 190250. 5607.10   3
  -3   4   1 160627. 7661.13   2
  -3  -4   0 4710.57 1439.45   4
   3   4   0 5483.41 863.939   3
  -3   4   0 4423.53 1018.60   3
  -3   4   0 4830.27 1086.60   2
  -3   4  -1 165127. 6514.00   3
  -3   4  -1 162573. 5292.37   2
  -3   4  -2 85623.9 4994.93   3
  -3   4  -2 100724. 3141.99   2
   3  -4  -2 89165.6 5578.24   4
  -3   4  -3 174756. 8135.52   3
   3  -4  -3 158766. 8248.43   4
  -3  -4   3 162989. 5419.93   3
  -3   4  -4 7682.04 1335.36   2
   3  -4  -4 3329.60 1072.91   4
  -3  -4   4 5704.90 1222.42   3
  -3   4  -5 254515. 8078.05   2
   3  -4  -5 147830. 8058.19   4
  -3   4  -6 82850.2 5101.71   2
  -3   4  -7 213816. 8899.62   2
  -3   4  -8 10230.1 2096.43   2
  -3   4  -9 144773. 8655.16   2
  -3   4 -10 75011.4 6650.49   2
   3   5 -13 9624.68 3539.66   2
   3   5 -12 167189. 14802.2   2
   3   5 -11 1835.65 1364.42   2
   3   5 -10 2498.53 1108.83   2
   3   5  -9 8970.96 3216.11   2
   3   5  -8 380948. 19909.2   2
   3   5  -7 8672.83 2851.52   2
  -3  -5  -7 5573.04 2114.27   4
  -3  -5  -6 6106.11 1910.78   4
   3   5  -6 11547.8 2716.89   2
  -3  -5  -5 5092.89 1968.69   4
   3   5  -5 3063.01 1736.76   2
  -3  -5  -4 298718. 13889.6   4
   3   5  -4 413787. 15623.2   2
  -3  -5  -3 5218.08 1929.05   4
  -3  -5  -2 13949.8 2902.18   4
  -3  -5  -1 10578.1 2443.97   4
   3   5  -1 13730.2 1761.69   3
  -3   5   1 9133.98 1478.79   3
  -3   5   1 9254.77 2114.48   2
  -3  -5   0 382798. 14414.4   4
  -3   5   0 392569. 10579.2   3
  -3   5  -1 10678.7 1747.53   3
  -3   5  -2 14844.3 2235.20   3
   3  -5  -2 12564.7 2477.39   4
   3  -5  -3 1628.38 856.341   4
  -3   5  -3 2668.55 641.940   2
  -3   5  -3 3264.36 1063.55   3
  -3  -5   3 2156.35 626.667   3
  -3   5  -4 452453. 11029.5   2
   3  -5  -4 316926. 13486.8   4
   3  -5  -5 6630.80 1803.95   4
  -3   5  -5 5571.64 1388.01   2
   3  -5  -6 7526.00 1990.66   4
  -3   5  -6 15257.8 2438.97   2
  -3   5  -7 15685.9 2452.75   2
  -3   5  -8 423425. 13240.0   2
  -3   5  -9 7509.12 1861.56   2
   3   6 -13 44217.7 7628.85   2
   3   6 -12-737.879 1574.06   2
   3   6 -11 78176.0 9754.22   2
   3   6 -10 10368.4 3710.85   2
   3   6  -9 195421. 14898.5   2
  -3  -6  -8 8793.22 3072.42   4
   3   6  -8 10554.8 3360.79   2
  -3  -6  -7 121114. 9518.93   4
   3   6  -7 180953. 12033.7   2
  -3  -6  -6 8738.16 2620.01   4
   3   6  -6 10911.3 2797.13   2
  -3  -6  -5 66900.4 7370.35   4
   3   6  -5 95134.7 8168.11   2
  -3  -6  -4 4370.22 1643.92   4
   3   6  -4 5039.79 1833.81   2
  -3  -6  -3 114661. 10013.5   4
   3   6  -2 15037.5 2224.55   3
  -3  -6  -2 13365.5 3052.15   4
  -3  -6  -1 226106. 12595.9   4
  -3   6   1 209504. 7900.14   3
  -3  -6   0 11680.2 2808.74   4
  -3   6   0 10864.4 1880.09   3
   3   6   0 14013.5 1946.85   3
  -3   6  -1 228081. 8708.59   3
   3  -6  -2 12458.8 2860.91   4
  -3   6  -2 11446.5 2156.03   3
   3  -6  -3 100832. 8174.36   4
  -3   6  -3 111966. 6737.62   3
   3  -6  -4 3190.06 1576.97   4
  -3   6  -4 6020.18 1242.39   2
   3  -6  -5 72170.3 7046.42   4
  -3   6  -5 106062. 6178.37   2
  -3   6  -6 13599.9 2456.64   2
   3  -6  -6 11462.6 2690.61   4
  -3   6  -7 238992. 10622.1   2
   3   7 -12 86943.4 10745.3   2
   3   7 -11 10315.4 3770.18   2
   3   7 -10 6363.41 2607.56   2
   3   7  -9 31290.6 5798.56   2
  -3  -7  -8 181910. 13328.1   4
   3   7  -8 264055. 16065.6   2
  -3  -7  -7 29578.0 5169.91   4
   3   7  -7 38610.2 5554.55   2
  -3  -7  -6 3257.50 1568.73   4
   3   7  -6 5250.57 2031.69   2
  -3  -7  -5 29195.9 5316.71   4
   3   7  -5 38142.1 5262.65   2
  -3  -7  -4 133585. 11564.8   4
   3   7  -4 167815. 10411.7   2
  -3  -7  -3 31890.8 5667.56   4
  -3  -7  -2 3089.36 1648.62   4
   3   7  -2 6604.44 1514.62   3
  -3   7   2 4541.83 1242.79   3
   3   7  -1 37265.0 3623.23   3
  -3   7   1 29165.4 3178.31   3
  -3  -7  -1 30596.4 5147.96   4
  -3   7   0 325880. 10970.3   3
  -3  -7   0 336995. 16671.3   4
  -3   7  -1 30047.8 3357.12   3
   3   7   1 31125.8 3068.42   3
   3  -7  -2 5782.24 2122.08   4
  -3   7  -2 6942.88 1677.54   3
   3  -7  -3 24883.3 4643.49   4
  -3   7  -3 30140.4 3623.95   3
  -3   7  -3 33010.6 2754.27   2
  -3   7  -4 126955. 8251.64   3
   3  -7  -4 125934. 10929.2   4
  -3   7  -4 155894. 6681.64   2
   3  -7  -5 26958.9 4933.71   4
  -3   7  -5 42353.6 4029.02   2
   3  -7  -6 2429.47 1661.49   4
   3  -7  -7 25525.2 4460.73   4
   3   8 -11 36347.2 7133.46   2
   3   8 -10 65834.4 9029.10   2
  -3  -8  -9 31824.4 6405.69   4
   3   8  -9 44381.4 6915.22   2
  -3  -8  -8 3056.04 1744.44   4
   3   8  -8 6341.63 2412.07   2
  -3  -8  -7 63569.6 8478.40   4
   3   8  -7 76617.2 7910.96   2
  -3  -8  -6 88576.1 9971.90   4
   3   8  -6 122561. 9989.41   2
  -3  -8  -5 54499.5 7986.28   4
   3   8  -5 56506.6 6424.59   2
  -3  -8  -4 207.609 914.065   4
   3   8  -4 876.111 823.996   2
  -3  -8  -3 56412.7 7981.50   4
   3   8  -2 115757. 7329.31   3
  -3  -8  -2 106536. 10642.1   4
  -3   8   2 86997.2 5841.04   3
  -3  -8  -1 56298.3 7684.14   4
   3   8  -1 75384.2 5676.22   3
  -3   8   1 59209.2 4890.04   3
  -3  -8   0 7277.66 2812.37   4
   3   8   0 7361.03 1782.12   3
  -3   8   0 7011.31 1629.70   3
  -3   8  -1 66942.1 5370.42   3
   3   8   1 76158.5 5427.81   3
  -3   8  -2 113977. 7290.70   3
   3  -8  -2 110710. 10475.0   4
   3  -8  -3 52653.7 7511.92   4
  -3   8  -3 51317.1 4992.99   3
   3  -8  -4 1687.48 1527.18   4
  -3   8  -4 970.966 575.117   3
   3  -8  -5 49297.8 7392.61   4
   3  -8  -6 90303.4 9666.78   4
   3  -8  -7 60887.4 7563.87   4
   3  -8  -8 4648.49 2175.61   4
   3   9 -10 3447.39 2217.47   2
  -3  -9  -9 40550.0 7264.94   4
   3   9  -9 46650.3 7302.80   2
  -3  -9  -8 21412.5 5154.82   4
   3   9  -8 27177.4 4832.04   2
   3   9  -7 72434.2 7995.09   2
  -3  -9  -7 50505.4 8129.32   4
  -3  -9  -6 1384.94 944.008   4
   3   9  -6 5628.95 2385.25   2
  -3  -9  -5 72583.6 10001.2   4
   3   9  -5 69419.5 7142.78   2
  -3  -9  -4 71236.6 10366.9   4
  -3   9   3 47319.5 4499.77   3
  -3  -9  -3 54817.8 8705.48   4
  -3  -9  -2 2785.67 1504.32   4
   3   9  -2 2570.77 1046.23   3
  -3   9   2 2160.39 1055.40   3
  -3  -9  -1 77685.3 9837.74   4
   3   9  -1 87138.6 6657.80   3
  -3   9   1 79728.9 6173.61   3
   3   9   0 41367.5 4457.58   3
  -3   9   0 38650.6 4302.57   3
  -3  -9   0 33781.5 6378.43   4
  -3   9  -1 84869.4 6356.96   3
   3   9   1 92129.6 6590.60   3
   3  -9  -2 1935.55 1597.59   4
  -3   9  -2 2372.74 984.994   3
   3   9   2 2373.18 1036.96   3
   3  -9  -3 48237.2 7784.25   4
  -3   9  -3 54733.7 5440.22   3
  -3   9  -4 71306.1 6754.90   3
   3  -9  -4 60386.6 8972.91   4
   3  -9  -5 53717.6 8500.64   4
   3  -9  -6 3732.43 1999.87   4
   3  -9  -7 49570.5 7681.81   4
   3  -9  -8 19596.3 4621.38   4
  -3 -10  -9 3171.91 2090.04   4
   3  10  -9 564.902 801.284   2
  -3 -10  -8 2982.05 2026.88   4
   3  10  -8 1074.47 1008.49   2
  -3 -10  -7 1007.36 672.233   4
   3  10  -7-992.903 1373.83   2
  -3 -10  -6 133118. 14150.4   4
   3  10  -6 158006. 11760.2   2
  -3 -10  -5 8982.38 3766.78   4
   3  10  -5 12273.8 3151.21   2
  -3 -10  -4 6479.37 3329.02   4
  -3  10   4 3308.76 1300.18   3
  -3 -10  -3 18778.9 5329.05   4
  -3  10   3 14600.1 2727.37   3
  -3 -10  -2 139655. 14469.0   4
   3  10  -2 150768. 9705.88   3
  -3  10   2 119256. 7797.81   3
  -3 -10  -1 3785.33 1949.56   4
   3  10  -1 5644.69 1836.15   3
  -3  10   1 3484.34 1200.96   3
  -3 -10   0 1739.10 1334.83   4
   3  10   0 2412.39 1049.79   3
  -3  10   0 2535.87 1170.69   3
   3 -10  -1 2376.55 1026.16   4
  -3  10  -1 2525.58 879.539   3
   3  10   1 2947.69 1312.67   3
  -3 -10   1 4085.01 2629.46   4
  -3  10  -2 140016. 8967.31   3
   3  10   2 137665. 8641.92   3
   3 -10  -2 140374. 14526.2   4
   3 -10  -3 15349.3 4723.70   4
   3  10   3 15498.0 2805.64   3
  -3  10  -3 14179.5 2911.65   3
   3 -10  -4 1698.78 1388.50   4
  -3  10  -4 2830.87 1303.09   3
   3 -10  -5 14953.8 4769.30   4
   3 -10  -6 124900. 13620.4   4
   3 -10  -7-335.034 1253.40   4
   3 -10  -8 800.727 1783.61   4
   3  11  -8 3196.18 1273.92   2
  -3 -11  -7 48659.8 9486.22   4
   3  11  -7 53940.7 7546.51   2
  -3 -11  -6 1271.67 1981.49   4
   3  11  -6 3098.14 1697.81   2
  -3 -11  -5 67799.8 11438.7   4
  -3  11   5 42246.1 4949.05   3
   3  11  -5 64208.8 7384.90   2
  -3  11   4 1228.77 804.975   3
  -3 -11  -4 712.049 1897.75   4
  -3 -11  -3 62555.1 10906.3   4
  -3  11   3 55203.1 5712.10   3
  -3 -11  -2 3292.24 2530.08   4
   3  11  -2 7854.23 2285.42   3
  -3  11   2 5276.81 1805.79   3
   3  11  -1 64499.6 6649.73   3
  -3  11   1 49478.0 5534.49   3
  -3 -11  -1 53048.2 9648.37   4
  -3 -11   0 4533.53 2741.33   4
   3  11   0 5724.93 2023.11   3
  -3  11   0 5067.86 1528.15   3
  -3 -11   1 58129.9 10182.5   4
  -3  11  -1 50265.1 5708.50   3
   3  11   1 57061.8 6138.64   3
   3 -11  -1 50715.5 9632.28   4
   3 -11  -2 3169.52 2231.19   4
  -3  11  -2 6457.30 1986.80   3
   3  11   2 4683.45 1717.04   3
   3 -11  -3 65323.4 10893.1   4
  -3  11  -3 72691.1 6961.63   3
   3  11   3 64291.6 6490.22   3
   3 -11  -4 739.889 466.948   4
  -3  11  -4-623.802 1117.98   3
   3  11   4 174.904 538.930   3
   3 -11  -5 56729.2 10535.3   4
   3 -11  -6 2569.98 1902.00   4
   3 -11  -7 39803.4 8047.82   4
   3  12  -5 4438.25 1990.98   2
  -3 -12  -4 1347.23 964.351   4
   3  12  -4 1653.70 1309.45   2
  -3  12   4 1219.58 472.170   3
  -3 -12  -3 8115.19 3884.45   4
  -3  12   3 4854.57 1889.00   3
  -3 -12  -2 82674.4 13166.9   4
  -3  12   2 88273.5 7720.53   3
  -3 -12  -1 12211.7 4989.76   4
   3  12  -1 7649.50 2340.25   3
  -3  12   1 9625.31 2554.47   3
  -3 -12   0 4238.20 3651.37   4
   3  12   0 3191.30 1508.85   3
  -3  12   0 3457.38 1677.18   3
  -3 -12   1 8679.04 4480.94   4
   3 -12  -1 8482.98 4165.91   4
  -3  12  -1 9804.18 2635.07   3
   3  12   1 9812.97 2608.44   3
   3 -12  -2 87203.4 13550.7   4
  -3  12  -2 91384.1 8080.28   3
  -3 -12   2 106560. 15052.9   4
   3  12   2 90055.6 8236.58   3
   3 -12  -3 2225.58 2245.47   4
  -3  12  -3 6535.58 2162.21   3
   3  12   3 4369.36 1737.12   3
   3 -12  -4 1972.40 1436.07   4
  -3  12  -4 677.747 1024.03   3
   3  12   4-313.758 624.279   3
   3 -12  -5 5129.22 3240.78   4
   3  12   5 5447.06 2176.95   3
   3 -12  -6 57995.7 10549.6   4
   3 -13   0 14510.5 6574.48   4
   3 -13  -1 23333.1 7808.78   4
   3 -13  -2 700.681 1022.40   4
   3 -13  -3 20946.6 6905.42   4
   3 -13  -4 24034.7 7906.98   4
   3 -13  -5 20788.2 6908.47   4
   4   0   0 527997. 13794.0   2
   4   0   0 536044. 10678.9   4
   4   0   1 27812.7 3244.19   4
   4   0  -1 24662.8 3318.65   2
  -4   0   1 26049.1 1527.01   3
   4   0   1 32026.2 2523.88   3
   4   0   2 26145.7 3394.73   4
   4   0  -2 20553.1 3770.54   2
   4   0   2 17698.5 2340.04   3
   4   0  -3 1009.59 1251.62   2
   4   0  -3 1211.04 791.662   1
   4   0   3 21.4922 153.088   3
   4   0  -4 315583. 18243.1   2
   4   0  -4 254985. 9632.03   1
   4   0  -5 460.438 489.526   2
   4   0  -5 537.072 486.484   1
   4   0   5 1298.74 808.752   2
   4   0  -6 6643.62 3081.22   2
   4   0   7 16221.0 3006.10   1
   4   0  -7 23389.3 5579.91   2
   4   0   8 393788. 15259.5   1
   4   0  -8 548692. 26151.2   2
   4   0  -9 22008.8 5262.80   2
   4   0   9 11741.9 2596.05   1
   4   0  10 3576.80 1354.41   1
   4   0 -10 6353.58 2806.65   2
   4   0  11 4372.18 1535.52   1
   4   0 -11 9440.60 3704.49   2
   4   0 -12 191784. 15506.9   2
   4   0 -13 6865.00 3462.83   2
   4   0 -14 3117.97 2513.56   2
   4   1 -13 61746.8 8807.67   2
   4   1 -12 3332.31 1378.11   2
   4   1 -11 122757. 12186.1   2
   4  -1  11 96679.2 8909.27   1
   4   1 -10 36532.4 6726.16   2
   4  -1  10 36773.3 5184.46   1
   4   1  -9 194305. 16169.4   2
   4  -1   9 147638. 9950.57   1
   4   1  -8 20325.0 5274.19   2
   4  -1   8 18052.4 3305.27   1
   4  -1   7 196266. 10577.5   1
   4   1  -7 203747. 15895.6   2
   4  -1   6 12798.4 3173.47   2
  -4   1   6 18238.1 2096.35   4
   4   1  -6 14559.2 1984.73   1
   4   1  -6 25568.9 5513.90   2
   4  -1   6 24252.0 3619.05   1
  -4   1   5 143681. 5061.19   4
   4  -1   5 140572. 8871.09   1
   4   1  -5 126255. 11414.4   2
   4  -1   4 10487.8 1876.78   2
  -4   1   4 11767.7 1089.80   4
   4   1  -4 14169.4 3586.43   2
   4  -1   4 11176.5 2496.10   1
   4   1  -3 172584. 10900.2   2
   4  -1   3 146249. 5957.72   2
   4  -1   2 96162.2 7326.98   1
   4  -1   2 81203.3 5258.00   3
   4   1  -2 81037.8 6709.94   2
  -4   1   2 72600.0 5437.14   2
   4  -1   1 288909. 8748.81   4
  -4  -1  -1 253755. 7520.79   4
   4  -1   1 301825. 12515.5   1
   4  -1   1 192012. 7193.62   2
  -4   1   1 230824. 5441.17   3
   4  -1   1 294380. 8523.83   3
   4   1  -1 243370. 10398.8   2
   4  -1   0 10962.7 1469.35   4
  -4  -1   0 10560.8 1429.96   4
   4  -1   0 11469.2 2490.54   1
   4  -1   0 8264.97 1921.60   2
  -4   1   0 10624.0 1292.04   3
  -4  -1   1 231452. 6764.13   4
   4  -1  -1 245185. 10830.8   1
   4   1   1 253133. 6084.90   3
   4  -1  -2 70152.7 5834.26   1
  -4  -1   2 62617.5 3136.50   4
   4  -1  -3 109945. 10040.3   2
   4  -1  -3 145526. 8257.97   1
   4  -1  -4 18124.5 4514.55   2
   4  -1  -4 15626.8 2799.51   1
   4  -1  -5 143806. 12601.8   2
   4  -1  -6 31386.4 5931.73   2
   4  -1  -7 242026. 15979.0   2
   4  -1  -8 16758.6 4354.44   2
   4  -1  -9 201579. 15265.0   2
   4   1  10 28036.5 4001.85   1
   4  -1 -10 55457.7 8220.31   2
   4   1  11 66930.3 6347.09   1
   4  -1 -11 108204. 12357.2   2
   4  -1 -12 10692.3 3997.64   2
   4  -1 -13 75408.7 10678.0   2
   4   2 -13 34568.5 6476.06   2
   4   2 -12 163672. 14285.9   2
   4   2 -11 23422.1 5191.88   2
   4   2 -10 1577.98 567.299   2
   4  -2  10 675.677 533.652   1
   4  -2   9 59074.3 7314.92   1
   4   2  -9 47042.0 7980.30   2
   4   2  -8 241435. 17587.2   2
   4  -2   8 288788. 15761.7   1
   4   2  -7 80428.6 10033.9   2
   4  -2   7 88158.7 8290.95   1
  -4   2   6 6114.37 1295.65   4
   4   2  -6 6148.30 2433.81   2
   4  -2   6 2836.33 1664.57   2
   4  -2   6 5944.62 2088.82   1
   4   2  -5 72519.5 8361.16   2
  -4   2   5 62482.0 3375.14   4
   4  -2   5 72219.7 7069.16   1
   4   2  -4 311003. 15102.6   2
   4  -2   4 363372. 15581.4   1
  -4  -2  -3 54478.6 4433.72   4
   4   2  -3 67386.7 6705.97   2
   4  -2   3 77350.0 7100.47   1
  -4  -2  -2 9103.55 1697.49   4
  -4   2   2 7832.27 1805.48   2
   4   2  -2 11006.5 2539.19   2
   4  -2   2 10917.7 2653.78   1
  -4  -2  -1 83989.0 5065.26   4
  -4   2   1 76945.9 3468.54   3
  -4  -2   0 384380. 11031.1   4
  -4   2   0 383849. 8321.20   3
  -4  -2   1 76878.8 4493.83   4
   4  -2  -1 90158.9 6233.23   2
  -4   2  -1 75664.5 4042.94   3
   4   2   1 96932.2 6389.06   4
   4  -2  -2 7920.47 2077.71   2
   4  -2  -3 52174.9 5997.14   2
   4  -2  -4 252609. 14155.1   2
   4  -2  -5 60562.4 7337.71   2
   4  -2  -6 3333.33 1661.16   2
   4  -2  -7 67580.7 8528.76   2
   4  -2  -8 225650. 16815.3   2
   4  -2  -9 61629.8 8829.48   2
   4  -2 -10 663.044 1317.81   2
   4  -2 -11 30438.1 6785.50   2
   4  -2 -12 165288. 16945.1   2
   4  -2 -13 57917.0 10188.4   2
   4   3 -13 47392.3 7472.09   2
   4   3 -12 3163.28 2407.09   2
   4   3 -11 83375.2 11207.9   2
   4   3 -10 110605. 12275.7   2
   4   3  -9 25834.0 5584.55   2
   4   3  -8 1180.42 816.452   2
   4   3  -7 70790.2 9114.05   2
   4  -3   7 15108.6 3305.71   2
  -4   3   6 288774. 8994.55   4
   4   3  -6 334743. 18646.4   2
   4  -3   5 161480. 12104.8   1
   4   3  -5 129278. 10149.1   2
   4  -3   4 9074.76 2644.04   1
  -4  -3  -4 6700.69 1695.36   4
   4   3  -4 10683.9 2730.16   2
   4  -3   3 181602. 12627.9   1
   4   3  -3 155076. 9902.57   2
  -4   3   2 205454. 11316.9   2
   4   3  -2 231021. 11205.6   2
  -4  -3  -1 40699.0 4170.12   4
  -4   3   1 38259.4 2697.92   3
  -4  -3   0 6981.76 1553.23   4
  -4   3   0 7728.25 1278.36   3
  -4   3   0 8824.33 1148.95   2
  -4   3  -1 49930.9 3530.42   3
  -4  -3   1 46431.0 3987.86   4
   4  -3  -2 176273. 5534.58   4
  -4   3  -2 211292. 8168.88   3
  -4  -3   3 121476. 3374.26   3
   4  -3  -3 167924. 10921.5   2
  -4  -3   4 7331.87 1249.09   3
   4  -3  -4 8995.24 2769.53   2
   4  -3  -5 139123. 11797.3   2
   4  -3  -6 338559. 19274.2   2
   4  -3  -7 65989.8 9222.15   2
   4  -3  -8 2695.03 2175.58   2
   4  -3  -9 24311.0 6118.93   2
   4  -3 -10 118400. 13623.8   2
   4  -3 -11 59144.6 9474.74   2
   4  -3 -12-1430.59 1204.48   2
   4  -3 -13 50792.5 9689.51   2
   4   4 -13 79880.9 10517.6   2
   4   4 -12 55573.9 9087.29   2
   4   4 -11 89669.9 11050.0   2
   4   4 -10 11275.3 3528.68   2
   4   4  -9 96125.1 11177.4   2
   4   4  -8 29745.5 6316.07   2
   4   4  -7 113690. 10933.1   2
   4   4  -6 17544.9 3950.09   2
  -4  -4  -5 123085. 8047.66   4
   4   4  -5 175218. 11580.2   2
  -4  -4  -4 106622. 7664.25   4
   4   4  -4 162052. 10779.5   2
  -4  -4  -3 147872. 8925.62   4
   4   4  -3 179986. 10396.7   2
  -4   4   2 11080.8 2658.70   2
  -4  -4  -2 12889.1 2508.83   4
  -4  -4  -1 114318. 7778.07   4
  -4   4   1 124287. 7685.39   2
  -4   4   1 115417. 5146.07   3
  -4  -4   0 21181.4 3120.78   4
  -4   4   0 25326.2 2638.84   2
   4   4   0 24365.5 1618.45   3
  -4   4   0 23117.9 2441.00   3
  -4   4  -1 136068. 6133.32   3
  -4  -4   1 133257. 7595.52   4
   4  -4  -2 11235.7 1848.01   4
  -4   4  -2 12136.4 1942.14   3
   4  -4  -3 140011. 6565.91   4
   4  -4  -4 99229.8 5489.86   4
  -4  -4   4 120284. 4756.82   3
  -4  -4   5 154363. 6834.31   3
   4  -4  -5 191060. 13914.5   2
   4  -4  -6 22249.1 5279.18   2
   4  -4  -7 119205. 12369.0   2
   4  -4  -8 27944.6 6529.57   2
   4  -4  -9 94490.3 12061.7   2
   4  -4 -10 9108.75 3793.59   2
   4  -4 -11 108235. 13889.1   2
   4   5 -12-1532.24 2143.08   2
   4   5 -11 12415.8 4212.95   2
   4   5 -10 252646. 18764.0   2
   4   5  -9 4439.04 2304.50   2
   4   5  -8 2109.49 1679.98   2
   4   5  -7 8611.81 3145.47   2
  -4  -5  -6 184602. 11073.5   4
   4   5  -6 266951. 14855.8   2
  -4  -5  -5 2691.50 1294.05   4
   4   5  -5 5015.39 1948.07   2
  -4  -5  -4 7416.26 2212.58   4
   4   5  -4 6443.37 2220.39   2
  -4  -5  -3 11304.7 2765.89   4
   4   5  -3 13509.7 3142.41   2
  -4   5   2 250396. 7890.10   3
  -4  -5  -2 311184. 14800.5   4
  -4   5   1 11323.8 2355.51   2
  -4  -5  -1 11776.8 2599.66   4
   4   5  -1 13129.0 1670.67   3
  -4   5   1 10499.9 1687.77   3
  -4   5   0 3581.76 1088.26   2
  -4  -5   0 3331.02 1343.05   4
   4   5   0 5332.48 948.650   3
  -4   5   0 3991.30 1018.98   3
  -4   5  -1 11877.2 1517.20   2
  -4  -5   1 8674.55 2302.97   4
  -4   5  -1 8755.68 1705.23   3
  -4   5  -2 301810. 10160.3   3
   4  -5  -2 304190. 11772.4   4
   4  -5  -3 7843.35 1867.77   4
  -4   5  -3 9035.19 1970.44   3
   4  -5  -4 4712.88 1452.31   4
   4  -5  -5 4724.14 1409.73   4
   4   6 -12 1318.77 897.049   2
   4   6 -11 60627.8 9085.40   2
   4   6 -10 12833.3 4061.00   2
   4   6  -9 165017. 14389.9   2
   4   6  -8 9531.21 3269.65   2
  -4  -6  -7 87589.4 8451.81   4
   4   6  -7 119732. 10388.5   2
  -4  -6  -6 7272.96 2306.78   4
   4   6  -6 9420.36 2901.84   2
  -4  -6  -5 91686.0 8465.38   4
   4   6  -5 140148. 10800.0   2
  -4  -6  -4 7256.76 2266.69   4
   4   6  -4 9185.78 2481.68   2
  -4  -6  -3 126723. 10165.4   4
  -4  -6  -2 11416.3 3018.45   4
  -4   6   2 9949.76 1716.69   3
  -4  -6  -1 133791. 9922.31   4
   4   6  -1 150220. 6340.98   3
  -4   6   1 135653. 6590.83   3
  -4  -6   0 5799.22 1894.56   4
   4   6   0 6114.63 1251.74   3
  -4   6   0 5393.33 1306.08   3
  -4   6  -1 144114. 7075.79   3
   4   6   1 153942. 5946.56   3
  -4  -6   1 149521. 10122.2   4
   4  -6  -2 9378.04 2466.16   4
  -4   6  -2 9865.64 1075.53   2
  -4   6  -2 9878.56 1920.84   3
   4  -6  -3 116505. 8578.83   4
  -4   6  -3 133697. 7625.62   3
   4  -6  -4 6217.56 1965.24   4
   4  -6  -5 81942.7 7041.26   4
   4  -6  -6 7876.51 2195.18   4
   4   7 -11 23589.9 5898.70   2
   4   7 -10 150441. 14090.8   2
   4   7  -9 19000.7 4892.75   2
  -4  -7  -8 3707.75 2139.03   4
   4   7  -8 5785.00 2791.51   2
  -4  -7  -7 8878.05 2810.09   4
   4   7  -7 12742.7 3339.48   2
  -4  -7  -6 142509. 11636.7   4
   4   7  -6 207679. 13995.3   2
  -4  -7  -5 31054.5 5478.67   4
   4   7  -5 42575.4 5918.13   2
  -4  -7  -4 2955.92 1218.19   4
   4   7  -4 8089.13 2348.87   2
  -4  -7  -3 49065.4 7223.93   4
  -4   7   3 34256.7 3386.77   3
  -4  -7  -2 190547. 13443.0   4
  -4   7   2 168740. 7792.09   3
  -4  -7  -1 13270.3 3351.56   4
   4   7  -1 18590.9 2503.60   3
  -4   7   1 14597.3 2373.85   3
   4   7   0 5429.71 1294.00   3
  -4   7   0 4947.39 1361.19   3
  -4  -7   0 5836.67 2336.18   4
  -4  -7   1 10089.8 2979.95   4
  -4   7  -1 10246.2 2048.43   3
   4   7   1 14316.9 2064.78   3
  -4   7  -2 180085. 8807.64   3
   4  -7  -2 191834. 12178.8   4
   4  -7  -3 36114.2 5302.64   4
  -4   7  -3 46548.8 4633.47   3
   4  -7  -4 6378.19 2320.20   4
  -4   7  -4 4225.22 1244.11   3
   4  -7  -5 24913.6 4295.59   4
   4  -7  -6 116666. 9026.95   4
   4   8 -10 6933.23 2892.17   2
   4   8  -9 47920.7 7614.01   2
  -4  -8  -8 43416.3 6858.35   4
   4   8  -8 49803.6 7073.31   2
  -4  -8  -7 29407.1 5539.79   4
   4   8  -7 37536.4 5892.52   2
  -4  -8  -6 5781.02 2501.19   4
   4   8  -6 12920.5 3371.47   2
  -4  -8  -5 50049.6 7426.00   4
   4   8  -5 73650.0 7954.26   2
  -4  -8  -4 88314.0 10172.9   4
   4   8  -4 107022. 9110.45   2
  -4  -8  -3 64580.4 8954.88   4
  -4   8   3 44220.9 4141.36   3
  -4  -8  -2 8650.63 2886.22   4
  -4   8   2 7050.74 1693.01   3
  -4  -8  -1 65710.2 8327.92   4
   4   8  -1 70063.1 5374.65   3
  -4   8   1 59838.7 5045.70   3
   4   8   0 80521.9 5621.04   3
  -4   8   0 66778.1 5315.41   3
  -4  -8   0 71951.1 8667.69   4
  -4   8  -1 57717.3 5070.25   3
   4   8   1 65040.6 5042.46   3
  -4  -8   1 59403.3 7773.95   4
   4  -8  -2 14794.1 3910.78   4
  -4   8  -2 12674.3 2404.98   3
   4   8   2 10325.2 1920.13   3
   4  -8  -3 45164.8 6628.49   4
  -4   8  -3 51692.9 5137.35   3
   4  -8  -4 84248.6 9666.82   4
  -4   8  -4 93266.6 7477.00   3
   4  -8  -5 59233.9 7543.06   4
   4  -8  -6 5424.66 2189.09   4
   4  -8  -7 25004.3 4580.38   4
  -4  -9  -9 28579.1 6118.85   4
   4   9  -9 31903.0 6478.42   2
  -4  -9  -8 399.394 937.833   4
   4   9  -8 1341.81 646.315   2
  -4  -9  -7 33104.5 6355.57   4
   4   9  -7 39338.5 6250.10   2
  -4  -9  -6 36192.4 6777.53   4
   4   9  -6 40475.9 6355.78   2
  -4  -9  -5 70768.9 9610.07   4
   4   9  -5 98251.7 9298.55   2
  -4  -9  -4 5853.14 2676.28   4
  -4   9   4 6026.68 1692.23   3
   4   9  -4 10061.0 2876.56   2
  -4  -9  -3 78509.3 10727.0   4
  -4   9   3 65250.4 5549.62   3
  -4  -9  -2 35254.0 6784.62   4
   4   9  -2 38169.1 4758.53   3
  -4   9   2 29868.7 3705.57   3
  -4  -9  -1 34968.4 6750.55   4
   4   9  -1 36092.9 4167.95   3
  -4   9   1 28873.6 3736.16   3
  -4  -9   0 2711.87 1709.80   4
   4   9   0 2780.23 1089.92   3
  -4   9   0 2312.39 1092.25   3
  -4   9  -1 35028.8 4187.48   3
   4   9   1 43146.2 4556.82   3
  -4  -9   1 38535.4 6861.49   4
  -4   9  -2 31785.6 4076.93   3
   4   9   2 32384.5 3898.06   3
   4  -9  -2 30865.1 6199.87   4
   4  -9  -3 71897.7 9409.13   4
  -4   9  -3 79657.9 6604.37   3
   4  -9  -4 10833.8 3892.81   4
  -4   9  -4 9160.35 2389.51   3
   4  -9  -5 69957.4 9263.99   4
   4  -9  -6 32369.6 5945.99   4
   4  10  -8 98482.6 10290.1   2
  -4 -10  -8 82581.9 10699.5   4
  -4 -10  -7 5019.61 2745.73   4
   4  10  -7 3313.99 1718.49   2
  -4 -10  -6 3105.39 2556.15   4
   4  10  -6 4250.48 2059.76   2
  -4 -10  -5 6705.92 3403.77   4
  -4  10   5 6644.40 1795.88   3
   4  10  -5 11285.4 3330.84   2
  -4 -10  -4 137883. 14912.5   4
  -4  10   4 104528. 7467.51   3
  -4 -10  -3 5450.45 2742.29   4
  -4  10   3 5530.91 1625.85   3
  -4 -10  -2 2795.23 1973.12   4
  -4  10   2 1449.65 758.861   3
  -4 -10  -1 2045.29 1587.63   4
  -4  10   1 3681.51 1513.04   3
  -4 -10   0 121291. 13441.6   4
   4  10   0 134687. 8725.18   3
  -4  10   0 120812. 8119.96   3
  -4 -10   1 877.131 475.332   4
  -4  10  -1 2187.39 1274.02   3
   4  10   1 1876.19 894.314   3
   4 -10  -1 1492.48 1766.39   4
   4 -10  -2 3932.75 2536.98   4
  -4  10  -2 2216.58 1043.91   3
   4  10   2 1759.40 962.928   3
  -4 -10   2 4359.27 2637.04   4
   4 -10  -3 4206.87 2422.80   4
  -4  10  -3 5308.67 1866.18   3
   4  10   3 5216.42 1851.23   3
  -4  10  -4 149875. 10371.0   3
   4 -10  -4 127819. 14386.9   4
   4 -10  -5 10746.9 3866.67   4
  -4 -11  -6 654.236 1337.87   4
   4  11  -6 2616.31 865.716   2
  -4  11   6 1505.30 1139.47   3
  -4 -11  -5 42620.7 8760.68   4
  -4  11   5 32348.4 4431.23   3
   4  11  -5 54504.3 7500.43   2
  -4 -11  -4 662.069 1300.90   4
  -4  11   4 327.146 391.683   3
   4  11  -4 1504.86 801.363   2
  -4 -11  -3 50707.0 10180.8   4
  -4  11   3 43608.2 5173.87   3
  -4 -11  -2 1815.78 1755.05   4
  -4  11   2 900.928 539.273   3
  -4 -11  -1 56497.0 9847.84   4
  -4  11   1 55766.7 5774.53   3
  -4 -11   0 6722.74 3169.72   4
  -4  11   0 2576.29 1168.32   3
  -4  11  -1 55551.6 6002.29   3
   4 -11  -1 63478.3 10536.1   4
  -4 -11   1 69183.3 11039.5   4
  -4 -11   2 823.841 1310.17   4
   4 -11  -2 2994.28 2231.70   4
  -4  11  -2 278.977 380.501   3
   4 -11  -3 40495.1 8372.81   4
  -4  11  -3 47165.3 5713.80   3
   4 -11  -4 242.312 1248.62   4
  -4  11  -4 996.650 862.739   3
  -4 -12  -3 10664.5 5159.68   4
  -4 -12  -2 2778.95 2249.24   4
  -4  12   2 5260.01 1857.08   3
  -4 -12  -1 7544.71 3447.21   4
  -4  12   1 4900.28 1797.63   3
  -4 -12   0 106290. 14921.8   4
  -4  12   0 96197.7 8114.15   3
   4 -12   0 96984.8 14429.7   4
   4 -12  -1 5428.40 3112.09   4
  -4 -12   1 7126.43 3905.15   4
  -4  12  -1 3650.85 1649.66   3
  -4 -12   2 6279.81 3505.06   4
   4 -12  -2 2609.60 2393.41   4
  -4  12  -2 3617.11 1546.21   3
  -4 -12   3 6923.35 3460.45   4
   4 -13   0 2655.76 2217.18   4
   4 -13  -1 23429.9 7822.56   4
   5   0   0 834.472 905.135   2
   5   0   1 14427.8 2413.06   4
  -5   0   1 21487.3 1584.13   3
   5   0  -1 20276.8 3412.77   2
   5   0   1 22622.3 2092.77   3
   5   0   1 18307.3 2617.93   2
   5   0  -2 458276. 16624.8   1
   5   0  -2 388236. 17980.3   2
   5   0   2 447393. 15988.3   4
   5   0   2 415403. 11388.4   3
  -5   0   2 391694. 6485.13   3
   5   0  -3 5881.24 2493.16   2
   5   0  -3 5944.96 1918.69   1
  -5   0   4 1151.41 301.451   4
   5   0  -4 1901.03 1041.24   1
   5   0  -5 7052.96 2943.04   2
   5   0  -5 5951.53 1647.78   1
   5   0  -6 266254. 19080.7   2
   5   0   6 278842. 13641.0   1
   5   0  -7 5269.74 3103.92   2
   5   0   7 2806.60 1280.52   1
   5   0  -8 1420.07 2156.71   2
   5   0   8 907.957 455.950   1
   5   0  -9 9796.71 3802.47   2
   5   0   9 6221.37 1957.03   1
   5   0 -10 331602. 20848.7   2
   5   0  10 222223. 12361.8   1
   5   0  11 4657.79 1678.24   1
   5   0 -11 4609.35 2344.76   2
   5   0 -12 591.240 1587.40   2
   5   0 -13 6506.27 3357.37   2
   5   1 -13 76703.0 10270.0   2
   5   1 -12 19834.4 5122.48   2
   5   1 -11 98224.8 11772.8   2
   5  -1  11 76373.6 8444.09   1
   5   1 -10 9459.56 3958.75   2
   5  -1  10 8987.93 2615.09   1
   5   1  -9 164784. 15879.4   2
   5  -1   9 123731. 9811.20   1
   5  -1   8 8174.94 2469.63   1
   5   1  -8 9261.47 4144.91   2
   5   1  -7 108480. 12370.4   2
   5  -1   7 119411. 9092.79   1
   5  -1   6 10373.1 2510.25   2
   5   1  -6 10969.7 2065.72   1
   5   1  -6 14679.7 4387.29   2
   5  -1   6 19016.9 3604.70   1
   5   1  -5 128190. 7982.66   1
   5  -1   5 166482. 10613.1   1
   5   1  -5 152093. 13430.1   2
   5  -1   4 55528.7 6149.06   1
   5   1  -4 57299.1 7720.95   2
   5  -1   4 39246.2 3652.73   2
   5  -1   3 200590. 11600.5   1
   5   1  -3 169678. 12230.6   2
   5  -1   2 23181.8 3294.66   4
   5  -1   2 25314.5 4164.37   1
   5   1  -2 22187.8 3879.06   2
  -5   1   2 18640.3 1636.47   3
   5  -1   2 15090.1 2028.40   2
   5  -1   1 170675. 7820.54   4
  -5   1   1 160140. 5015.37   3
   5   1  -1 175327. 10306.1   2
   5  -1   0 1818.81 563.462   4
  -5  -1   0 2339.06 765.567   4
   5  -1   0 1927.81 1006.97   2
  -5   1   0 1900.82 556.969   3
   5  -1   0 1843.14 1215.86   1
   5   1   0 4005.97 1498.06   2
  -5  -1   1 172016. 5576.48   4
   5  -1  -1 166287. 10192.5   1
   5   1   1 182353. 5096.12   3
  -5  -1   2 19943.7 1876.92   4
   5  -1  -2 18314.6 3365.03   1
  -5  -1   2 18235.1 1048.96   3
   5   1   2 16802.3 2137.40   3
   5  -1  -3 96484.3 10008.3   2
   5   1   3 93068.8 6543.52   3
   5  -1  -3 142768. 9316.76   1
  -5  -1   3 132108. 4737.91   4
   5  -1  -4 51525.9 7875.54   2
   5  -1  -4 45758.6 5529.05   1
   5  -1  -5 159048. 14165.9   2
   5  -1  -6 15814.4 4258.27   2
   5  -1  -7 152127. 13727.6   2
   5  -1  -8 22684.7 5311.27   2
   5  -1  -9 152047. 13962.3   2
   5   1  10 8194.79 2315.35   1
   5  -1 -10 13821.8 4301.45   2
   5   1  11 56094.5 6271.30   1
   5  -1 -11 94423.7 11687.6   2
   5  -1 -12 27549.9 6640.38   2
   5  -1 -13 85888.1 11902.7   2
   5   2 -13 35016.6 6762.39   2
   5   2 -12 8989.66 3802.95   2
   5   2 -11 45315.0 8308.12   2
   5  -2  11 46415.2 7080.33   1
   5  -2  10 153203. 13016.9   1
   5   2 -10 173067. 16814.8   2
   5   2  -9 26736.8 6469.99   2
   5  -2   9 33769.6 5814.31   1
   5   2  -8 1727.43 2036.56   2
   5  -2   8 1151.72 1019.40   1
   5   2  -7 18517.9 5315.10   2
   5  -2   7 22349.8 4345.19   1
   5   2  -7 13121.5 2276.98   1
   5   2  -6 253514. 17436.1   2
   5  -2   6 260553. 14735.0   1
   5   2  -5 83600.7 9637.37   2
   5  -2   5 88931.2 8543.39   1
   5   2  -4 16286.7 3647.57   2
   5  -2   4 16324.4 3650.80   1
   5   2  -3 97493.4 8512.78   2
   5  -2   3 130524. 10292.2   1
  -5  -2  -2 225329. 8638.67   4
   5   2  -2 251439. 13193.9   2
   5  -2   1 19176.0 2140.92   2
  -5  -2  -1 23870.0 2716.25   4
  -5   2   1 22867.7 2061.01   3
   5  -2   1 30353.8 4893.84   1
   5   2  -1 25800.2 3744.97   2
   5  -2   0 1023.82 856.537   1
   5  -2   0-575.316 526.886   2
  -5  -2   0 163.379 185.107   4
   5  -2   0 371.413 256.134   4
  -5   2   0 887.124 513.161   3
  -5  -2   1 19172.4 2445.91   4
   5  -2  -1 18338.1 3247.54   2
  -5   2  -1 22567.6 2455.59   3
   5   2   1 24266.6 1478.99   3
   5  -2  -1 26650.2 4753.12   1
  -5  -2   2 181007. 7047.25   4
   5  -2  -2 194424. 11589.8   2
   5  -2  -3 91033.0 8512.20   2
  -5  -2   3 90026.4 4862.16   4
   5  -2  -4 15327.3 3610.97   2
   5  -2  -5 63060.5 7816.40   2
   5  -2  -6 193076. 14518.9   2
   5  -2  -7 7439.17 2835.83   2
   5  -2  -8 1438.80 1580.03   2
   5  -2  -9 44140.8 7609.14   2
   5  -2 -10 127826. 13803.7   2
   5  -2 -11 62238.0 10497.3   2
   5  -2 -12 14285.3 5201.08   2
   5  -2 -13 47994.8 9255.06   2
   5   3 -12 114965. 13236.8   2
   5   3 -11 50640.1 9170.13   2
   5   3 -10 2503.97 1154.01   2
   5   3  -9 33287.5 7258.19   2
   5   3  -8 140786. 14342.7   2
   5  -3   7 56629.7 7977.41   1
   5   3  -7 57442.9 8743.01   2
   5   3  -6 17629.2 4535.87   2
   5  -3   6 16488.5 4239.64   1
   5  -3   5 104840. 10972.8   1
   5   3  -5 71920.1 8309.66   2
   5  -3   4 303349. 18574.2   1
   5   3  -4 201606. 12911.1   2
   5  -3   3 113927. 11302.1   1
   5   3  -3 86343.2 8209.31   2
  -5  -3  -2 9071.04 1903.43   4
  -5   3   2 10021.0 2068.89   2
  -5   3   2 7992.70 1292.25   3
   5   3  -2 11249.6 2678.18   2
   5  -3   2 13448.6 3681.94   1
  -5  -3  -1 47652.6 4312.57   4
  -5   3   1 50341.8 3339.10   3
  -5   3   1 55493.7 3755.07   2
  -5  -3   0 164064. 8587.65   4
  -5   3   0 160278. 6182.15   3
  -5   3  -1 46059.7 3475.79   3
  -5  -3   1 41748.8 3939.97   4
   5  -3  -2 18438.5 3317.15   2
  -5  -3   2 11609.9 2029.93   4
   5  -3  -3 84305.4 7748.39   2
   5  -3  -4 222494. 13912.2   2
   5  -3  -5 78660.7 8969.96   2
   5  -3  -6 9433.44 3319.53   2
   5  -3  -7 52027.5 8049.69   2
   5  -3  -8 131959. 13671.0   2
   5  -3  -9 30122.1 6774.04   2
   5  -3 -10 7456.59 3412.65   2
   5  -3 -11 43290.9 8831.90   2
   5  -3 -12 128394. 15153.9   2
   5  -3 -13 38206.6 8680.76   2
   5   4 -12 9088.43 4185.09   2
   5   4 -11 67883.5 10288.0   2
   5   4 -10 27772.9 6633.89   2
   5   4  -9 66560.5 9959.50   2
   5   4  -8 5552.37 3083.76   2
   5   4  -7 144679. 13324.1   2
   5   4  -6 57117.0 7827.11   2
  -5  -4  -5 114222. 8224.23   4
   5   4  -5 158814. 11860.8   2
  -5  -4  -4 15004.0 2716.84   4
   5   4  -4 24474.1 4699.31   2
  -5  -4  -3 103795. 7324.13   4
   5   4  -3 152853. 10772.9   2
  -5  -4  -2 37598.2 4384.46   4
  -5   4   2 34163.5 2897.31   3
  -5  -4  -1 102881. 7450.63   4
  -5   4   1 114656. 5760.83   2
  -5   4   1 105876. 5257.19   3
  -5  -4   0 11811.2 2433.49   4
  -5   4   0 12271.8 1813.49   3
  -5  -4   1 110748. 7357.72   4
  -5   4  -1 110162. 5737.33   3
   5   4   1 112804. 3056.48   3
   5  -4  -2 33683.7 2874.55   4
  -5   4  -2 37523.8 3672.06   3
  -5  -4   2 35560.1 4055.33   4
   5  -4  -4 26653.7 4918.03   2
   5  -4  -5 176993. 13348.2   2
   5  -4  -6 55242.5 8209.70   2
   5  -4  -7 140593. 13814.6   2
   5  -4  -8 8458.83 3541.16   2
   5  -4  -9 63413.9 9986.14   2
   5  -4 -10 31700.5 7338.61   2
   5  -4 -11 77839.2 12092.5   2
   5  -4 -12 4016.62 2544.33   2
   5   5 -11 1881.41 1173.34   2
   5   5 -10 391.547 1128.12   2
   5   5  -9 8702.18 3730.51   2
   5   5  -8 241369. 17878.5   2
   5   5  -7 20811.5 4899.14   2
  -5  -5  -6 7720.47 2311.08   4
   5   5  -6 6842.27 2356.60   2
  -5  -5  -5 3610.26 1505.35   4
   5   5  -5 3806.14 1761.49   2
  -5  -5  -4 197487. 11256.7   4
   5   5  -4 283686. 15525.0   2
  -5  -5  -3 5314.87 1845.48   4
  -5   5   3 2714.33 843.385   3
   5   5  -3 5612.09 2072.07   2
  -5  -5  -2 4127.49 1606.51   4
  -5   5   2 3090.48 896.681   3
  -5  -5  -1 19359.6 3648.50   4
  -5   5   1 17068.5 2237.51   3
  -5  -5   0 234712. 11801.5   4
  -5   5   0 232209. 8458.82   3
  -5  -5   1 17085.4 3187.18   4
  -5   5  -1 17092.3 2438.99   3
   5   5   1 19669.0 1673.56   3
  -5  -5   2 3080.16 1572.05   4
   5  -5  -2 3510.72 1204.08   4
  -5   5  -2 3258.93 969.791   3
   5  -5  -3 2910.51 931.045   4
  -5   5  -3 3111.85 980.904   3
   5  -5  -4 141161. 6642.44   4
   5   6 -11 56511.7 9653.87   2
   5   6 -10 5964.71 2851.27   2
   5   6  -9 140011. 14127.5   2
   5   6  -8 18490.3 4936.83   2
  -5  -6  -7 96395.5 9142.17   4
   5   6  -7 139769. 12172.5   2
  -5  -6  -6 6384.79 2222.69   4
   5   6  -6 10098.2 3105.39   2
  -5  -6  -5 52011.7 6367.37   4
   5   6  -5 79749.1 8806.26   2
  -5  -6  -4 3576.77 1668.06   4
   5   6  -4 7504.32 2624.39   2
  -5  -6  -3 67328.9 7421.56   4
  -5   6   3 56599.9 4122.96   3
  -5  -6  -2 3167.17 1587.30   4
  -5   6   2 3552.82 1001.56   3
  -5  -6  -1 147451. 10936.1   4
  -5   6   1 140313. 6902.95   3
  -5  -6   0 23803.4 4153.92   4
   5   6   0 26914.7 2332.31   3
  -5   6   0 23881.3 2866.64   3
  -5   6  -1 142282. 7345.23   3
  -5  -6   1 145394. 10357.5   4
  -5  -6   2 4049.61 1822.96   4
   5  -6  -2 2614.94 1268.01   4
  -5   6  -2 4117.40 1267.41   3
  -5   6  -3 80729.5 6178.54   3
   5  -6  -3 64351.0 6264.38   4
   5  -6  -4 3003.86 1105.48   4
   5   7 -10 2590.75 2398.05   2
   5   7  -9 27328.5 6062.49   2
   5   7  -8 186467. 15241.4   2
  -5  -7  -7 27138.3 5009.61   4
   5   7  -7 33158.5 5782.96   2
  -5  -7  -6 3450.77 1946.30   4
   5   7  -6 4474.01 1953.57   2
  -5  -7  -5 10998.7 3169.43   4
   5   7  -5 13890.1 3613.02   2
  -5  -7  -4 84057.7 8789.22   4
   5   7  -4 109067. 9619.21   2
  -5  -7  -3 12369.2 3432.45   4
  -5   7   3 9576.20 1896.18   3
  -5  -7  -2 2814.20 1789.23   4
  -5   7   2 620.741 300.157   3
  -5  -7  -1 37835.6 5893.63   4
  -5   7   1 31672.1 3503.51   3
  -5  -7   0 173121. 12460.7   4
   5   7   0 202932. 7645.00   3
  -5   7   0 171483. 8230.95   3
  -5   7  -1 30535.1 3628.32   3
   5   7   1 33220.9 3088.13   3
  -5  -7   1 31193.1 5247.47   4
  -5  -7   2 543.647 1066.21   4
   5  -7  -2 1436.71 1061.09   4
  -5   7  -2 444.914 463.457   3
   5   7   2 937.567 566.806   3
   5  -7  -3 8027.02 2423.04   4
  -5   7  -3 8962.68 2122.28   3
   5  -7  -4 70763.8 7174.88   4
   5   8  -9 44763.0 7837.61   2
  -5  -8  -8 5483.16 2514.31   4
   5   8  -8 4234.30 2146.30   2
  -5  -8  -7 36335.5 5902.68   4
   5   8  -7 50174.9 7366.31   2
  -5  -8  -6 65935.8 8540.34   4
   5   8  -6 88127.0 9947.34   2
  -5  -8  -5 28108.9 5538.38   4
   5   8  -5 45478.8 6728.88   2
  -5  -8  -4 4540.13 2062.31   4
  -5   8   4 2472.66 929.856   3
   5   8  -4 6257.95 2301.86   2
  -5  -8  -3 38930.7 6710.68   4
  -5   8   3 29340.8 3535.08   3
  -5  -8  -2 80775.0 9951.58   4
  -5   8   2 74968.7 5758.21   3
  -5  -8  -1 50827.1 7461.29   4
  -5   8   1 48822.8 4624.23   3
  -5  -8   0 723.645 1330.10   4
  -5   8   0 1885.28 770.747   3
  -5   8  -1 53889.2 5001.93   3
  -5  -8   1 52719.7 7493.84   4
  -5   8  -2 71297.4 5841.06   3
  -5  -8   2 81102.7 9320.14   4
   5  -8  -2 69219.5 8093.92   4
   5  -8  -3 30996.1 5392.27   4
  -5   8  -3 43067.6 4834.22   3
  -5  -9  -8 19573.0 4904.21   4
   5   9  -8 19068.1 4570.41   2
  -5  -9  -7 35227.7 6445.31   4
   5   9  -7 45033.1 7134.84   2
  -5  -9  -6 3304.47 2373.59   4
   5   9  -6 3454.02 1847.95   2
  -5  -9  -5 48805.4 7843.29   4
  -5   9   5 38449.0 4193.42   3
  -5  -9  -4 44323.5 7618.75   4
  -5   9   4 36523.1 4305.66   3
  -5  -9  -3 52630.2 8506.38   4
  -5   9   3 41299.0 4462.38   3
  -5  -9  -2 2976.68 2490.34   4
  -5   9   2 3101.89 1057.10   3
  -5  -9  -1 41873.1 7345.11   4
  -5   9   1 41390.8 4482.60   3
  -5  -9   0 23126.2 5511.80   4
  -5   9   0 17687.7 2978.62   3
  -5   9  -1 50316.0 5181.41   3
   5  -9  -1 47792.3 7675.78   4
  -5  -9   1 54415.3 8321.89   4
  -5  -9   2 8453.72 2853.78   4
   5  -9  -2 6501.75 2915.48   4
  -5   9  -2 4684.55 1500.94   3
  -5   9  -3 51752.0 5468.93   3
  -5 -10  -6 99508.0 11932.6   4
   5  10  -6 133782. 12474.7   2
  -5 -10  -5 9552.78 3825.83   4
   5  10  -5 12667.4 3780.39   2
  -5  10   5 4939.58 1549.39   3
  -5 -10  -4 1816.56 613.155   4
  -5  10   4 1506.05 773.213   3
   5  10  -4 3839.84 1972.81   2
  -5 -10  -3 13181.5 4482.98   4
  -5  10   3 11319.3 2543.92   3
  -5 -10  -2 112773. 13757.5   4
  -5  10   2 91906.6 7123.42   3
  -5 -10  -1 2609.39 2273.50   4
  -5  10   1 4966.04 1517.36   3
  -5 -10   0 2838.03 2012.67   4
  -5  10   0 1912.52 1139.39   3
   5 -10  -1 2512.37 2111.79   4
  -5 -10   1 4250.66 2473.34   4
  -5  10  -1 2983.88 1233.66   3
  -5  10  -2 103351. 7795.05   3
  -5 -10   2 115593. 13171.9   4
  -5  10  -3 13305.1 2854.10   3
  -5 -10   3 12658.3 4418.44   4
  -5  10  -4 2515.49 991.286   3
  -5 -11  -4 792.092 492.889   4
  -5  11   4-60.5049 348.809   3
  -5 -11  -3 43619.9 9080.04   4
  -5  11   3 33390.3 4600.32   3
  -5 -11  -2 9054.78 3976.72   4
  -5  11   2 7302.70 2176.74   3
  -5 -11  -1 40787.0 8589.51   4
  -5  11   1 40532.8 4942.30   3
  -5 -11   0-907.028 313.335   4
  -5  11   0 1478.30 761.271   3
  -5 -11   1 45531.5 8877.43   4
  -5  11  -1 40332.7 5128.91   3
  -5 -11   2 7893.50 3813.24   4
  -5  11  -2 4718.58 1649.82   3
  -5  11  -3 39952.4 5414.08   3
  -5 -11   3 51428.4 9577.42   4
   6   0   0 361847. 17039.0   1
   6   0   0 199099. 11049.2   2
   6   0  -1 15672.1 3695.87   1
   6   0  -1 10802.6 2935.56   2
   6   0   1 11723.2 2535.39   2
   6   0   1 11895.5 2268.33   4
   6   0  -2 3033.25 2205.68   2
   6   0  -2 2189.22 1365.35   1
  -6   0   2 3084.32 648.332   3
   6   0   2 1147.39 648.397   3
   6   0  -3 249.818 255.379   2
  -6   0   3 617.593 305.556   3
   6   0  -4 156356. 14687.8   2
   6   0  -4 137861. 9546.09   1
   6   0   5 11468.3 3048.28   1
   6   0  -5 6573.90 2788.98   2
   6   0  -5 4922.05 1894.68   1
   6   0  -6 2439.83 2241.48   2
   6   0   6 2228.38 1103.40   1
   6   0  -6 652.881 672.735   1
   6   0  -7 25968.5 6639.44   2
   6   0   7 20519.4 4228.90   1
   6   0  -8 298285. 22143.1   2
   6   0   8 222722. 13393.3   1
   6   0  -9 16186.3 5004.39   2
   6   0   9 9594.02 2675.54   1
   6   0  10 1828.54 1193.88   1
   6   0 -10 1346.82 1477.52   2
   6   0  11 1262.97 831.104   1
   6   0 -11 1475.27 1409.42   2
   6   0 -12 158682. 15679.6   2
   6   1 -12 3740.89 1633.01   2
   6   1 -11 72838.4 10518.0   2
   6  -1  11 55502.1 7731.07   1
   6   1 -10 18501.9 5360.82   2
   6  -1  10 20900.7 4576.59   1
   6   1  -9 120370. 14449.0   2
   6  -1   9 100654. 9714.43   1
   6   1  -8 26357.0 6493.22   2
   6  -1   8 19683.5 4021.01   1
   6   1  -7 110532. 13069.6   2
   6  -1   7 120724. 10080.9   1
   6   1  -6 21543.3 5634.20   2
   6   1  -6 13851.7 2759.09   1
   6  -1   6 22595.2 4308.86   1
   6   1  -5 81396.0 7361.41   1
   6  -1   5 116963. 9808.68   1
   6   1  -5 103027. 12027.3   2
   6   1  -4 3565.51 2641.83   2
   6  -1   4 2791.09 1000.88   2
   6  -1   4 4800.41 1764.00   1
   6   1  -4 3724.34 1703.63   1
   6  -1   3 102331. 9177.97   1
   6   1  -3 87245.6 9652.30   2
  -6   1   3 71852.2 3405.79   3
   6  -1   2 29000.3 4970.95   1
   6   1  -2 22551.3 4291.89   2
  -6   1   2 24868.4 2054.88   3
   6  -1   1 94016.1 6475.93   4
   6  -1   1 187887. 12335.0   1
   6  -1   1 74568.4 6450.53   2
  -6   1   1 151540. 5379.92   3
   6   1  -1 154537. 10929.8   2
   6  -1   0 35982.9 5288.27   1
   6   1   0 31703.3 4491.07   2
   6  -1  -1 72586.7 8152.14   2
   6  -1  -1 160070. 11321.8   1
  -6  -1   2 23182.4 1775.34   4
   6  -1  -2 21455.2 4155.59   1
   6   1   2 22993.2 2446.99   3
  -6  -1   3 91952.9 3566.18   4
   6  -1  -3 51279.6 7728.12   2
   6   1   3 66564.1 5117.73   3
   6  -1  -3 89306.8 8436.13   1
   6  -1  -4 1693.98 1712.54   2
   6  -1  -4 4894.23 1933.95   1
   6  -1  -5 72530.5 7748.07   1
   6  -1  -5 87968.2 10954.3   2
   6  -1  -6 26168.0 6138.40   2
   6  -1  -7 127053. 13025.6   2
   6  -1  -8 26256.9 5929.85   2
   6   1   9 92024.9 8614.81   1
   6  -1  -9 123610. 13236.7   2
   6   1  10 11025.4 3060.69   1
   6  -1 -10 21788.5 5723.60   2
   6  -1 -11 63560.2 9922.03   2
   6   1  11 32770.9 5080.64   1
   6  -1 -12 9647.90 3809.57   2
   6   2 -12 103069. 12896.8   2
   6   2 -11 24393.5 6556.55   2
   6  -2  11 18043.8 4705.66   1
   6  -2  10 1713.26 412.385   1
   6   2 -10 3388.39 2999.46   2
   6   2  -9 34365.4 7584.63   2
   6  -2   9 43338.6 7097.27   1
   6   2  -8 155319. 15808.1   2
   6  -2   8 157823. 13333.6   1
   6   2  -7 27758.3 3882.70   1
   6   2  -7 47616.9 8791.75   2
   6  -2   7 47506.1 7054.17   1
   6   2  -6 12144.1 3998.51   2
   6  -2   6 13497.6 3623.75   1
   6   2  -5 47594.9 7899.40   2
   6  -2   5 44663.5 6549.50   1
   6   2  -4 193497. 14767.2   2
   6  -2   4 218339. 14727.0   1
   6   2  -3 31525.9 5248.13   2
  -6   2   3 30018.6 2473.48   3
  -6   2   2 6098.00 1127.57   3
   6  -2   2 7609.18 2524.35   1
   6   2  -2 7162.50 2455.89   2
   6  -2   1 51431.6 4205.08   2
  -6  -2  -1 71296.0 4839.44   4
  -6   2   1 61067.6 3672.03   3
   6  -2   1 83180.8 9015.52   1
   6   2  -1 64835.1 6865.24   2
   6  -2   1 50881.8 4536.30   4
   6  -2   0 105128. 4649.90   4
   6  -2   0 134707. 8341.96   2
  -6  -2   0 156595. 6571.64   4
  -6   2   0 148429. 6162.95   3
   6  -2   0 204985. 14221.6   1
   6   2   0 160557. 10251.0   2
  -6  -2   1 67199.0 4436.04   4
   6  -2  -1 51997.0 5759.42   2
   6  -2  -2 5738.31 1877.76   2
  -6  -2   2 6373.06 1334.30   4
   6   2   2 8080.82 1236.75   3
   6  -2  -2 9623.76 3145.25   1
  -6  -2   3 36069.8 3159.95   4
   6  -2  -3 34845.3 5619.39   2
   6  -2  -3 45255.3 6845.99   1
   6  -2  -4 137668. 11445.3   2
  -6  -2   4 148029. 6438.92   4
   6  -2  -5 33368.3 5923.56   2
   6  -2  -6 10492.9 3525.95   2
   6  -2  -7 36669.3 6703.09   2
   6  -2  -8 110922. 12506.0   2
   6  -2  -9 35381.2 7222.31   2
   6  -2 -10 2903.18 1114.67   2
   6   2  11 16544.0 3582.24   1
   6  -2 -11 24571.4 6282.15   2
   6  -2 -12 103746. 14032.9   2
   6   3 -11 53418.8 9869.01   2
   6   3 -10 69380.3 11056.8   2
   6   3  -9 29408.3 6828.35   2
   6   3  -8 3745.23 1867.70   2
   6  -3   8 1472.98 937.070   1
   6  -3   7 70730.3 9861.37   1
   6   3  -7 52471.4 8663.36   2
   6  -3   6 173212. 15370.4   1
   6   3  -6 124841. 12936.8   2
   6  -3   5 99297.3 11635.1   1
   6   3  -5 68490.2 9140.02   2
   6  -3   4 39046.9 7283.65   1
   6   3  -4 20218.4 4406.02   2
   6   3  -3 82520.1 8848.49   2
  -6   3   3 57635.0 3714.05   3
  -6  -3  -2 113027. 6575.54   4
  -6   3   2 121167. 5547.71   3
  -6  -3  -1 54912.7 4729.67   4
  -6   3   1 57619.7 3821.61   3
   6   3  -1 61627.0 6675.55   2
  -6  -3   0 2445.68 1029.89   4
   6  -3   0 2718.47 812.465   4
  -6   3   0 2949.30 894.775   3
   6  -3   0 2712.35 1217.43   1
   6  -3   0 4144.03 1027.00   2
  -6  -3   1 45259.6 4304.93   4
  -6   3  -1 54058.7 4326.32   3
  -6  -3   2 111764. 6801.46   4
   6   3   2 116586. 4321.05   3
  -6  -3   3 57823.0 4739.47   4
   6  -3  -3 79287.9 7694.19   2
  -6  -3   4 19989.1 2786.48   4
   6  -3  -4 21611.9 4505.74   2
   6  -3  -5 65371.0 8296.46   2
   6  -3  -6 115239. 11652.4   2
   6  -3  -7 50579.7 8053.94   2
   6  -3  -8 1379.28 1111.74   2
   6  -3  -9 21293.9 5967.49   2
   6  -3 -10 88006.5 12939.4   2
   6  -3 -11 37525.3 8317.69   2
   6  -3 -12 2134.17 810.577   2
   6   4 -11 54512.9 9728.29   2
   6   4 -10 17694.2 5020.47   2
   6   4  -9 72732.1 11217.5   2
   6   4  -8 12067.2 4446.66   2
   6   4  -7 79380.7 10732.5   2
   6   4  -6 6845.21 3078.02   2
   6   4  -5 118495. 11133.1   2
  -6  -4  -4 46118.3 5097.27   4
   6   4  -4 67112.3 8183.59   2
  -6  -4  -3 76765.1 6134.60   4
  -6   4   3 81732.2 4751.07   3
  -6  -4  -2 11347.3 2345.02   4
  -6   4   2 12587.8 1927.96   3
   6   4  -2 16508.9 3684.28   2
  -6  -4  -1 55383.9 5329.17   4
  -6   4   1 52879.6 3872.01   3
  -6  -4   0 11796.5 2477.95   4
  -6   4   0 13493.7 2056.43   3
  -6  -4   1 60515.1 5823.30   4
  -6   4  -1 59074.9 4487.75   3
   6  -4  -1 51781.1 3027.76   4
  -6  -4   2 11004.2 2320.46   4
   6  -4  -3 148611. 10415.9   2
  -6  -4   3 105231. 7267.41   4
   6  -4  -4 66659.6 7608.15   2
   6  -4  -5 122657. 11102.8   2
   6  -4  -6 9663.40 3464.88   2
   6  -4  -7 83224.4 10592.0   2
   6  -4  -8 15099.1 4668.42   2
   6  -4  -9 68268.3 10645.3   2
   6  -4 -10 9882.40 4379.72   2
   6  -4 -11 62310.0 11321.4   2
   6  -4 -12 22352.5 6916.01   2
   6   5 -10 146833. 16072.8   2
   6   5  -9 4839.27 2960.82   2
   6   5  -8 2668.75 2211.86   2
   6   5  -7 7331.63 3104.22   2
   6   5  -6 208660. 15422.3   2
  -6  -5  -5 9413.15 2539.18   4
   6   5  -5 10546.8 3424.04   2
  -6  -5  -4 2063.80 1101.57   4
   6   5  -4 2391.93 1626.56   2
  -6   5   4 1580.07 647.784   3
  -6  -5  -3 15345.7 3141.62   4
  -6   5   3 12949.5 2000.36   3
  -6  -5  -2 153669. 10050.1   4
  -6   5   2 152499. 7113.72   3
  -6  -5  -1 2088.02 1116.71   4
  -6   5   1 2316.27 815.224   3
  -6  -5   0 950.788 1075.18   4
  -6   5   0 1216.43 701.448   3
  -6  -5   1 2539.66 1050.20   4
  -6   5  -1 1642.70 866.474   3
   6  -5  -1 2231.14 908.465   4
  -6  -5   2 189115. 10987.8   4
  -6   5  -2 189508. 9156.66   3
  -6  -5   3 14959.6 2978.52   4
   6   6 -10 11250.5 4292.16   2
   6   6  -9 80395.6 11801.2   2
   6   6  -8 9211.87 3956.06   2
   6   6  -7 84359.7 10267.3   2
  -6  -6  -6 6744.45 2405.23   4
   6   6  -6 11406.8 3638.48   2
  -6  -6  -5 54855.2 6158.90   4
   6   6  -5 91351.2 10237.0   2
  -6  -6  -4 9048.75 2748.57   4
   6   6  -4 12666.8 3598.02   2
  -6   6   4 6780.59 1519.62   3
  -6  -6  -3 64491.6 7109.23   4
  -6   6   3 55669.7 4416.81   3
  -6  -6  -2 9195.92 2751.91   4
  -6   6   2 8750.36 1747.92   3
  -6  -6  -1 101666. 9300.24   4
  -6   6   1 88035.9 5671.03   3
  -6  -6   0 7370.24 2462.79   4
  -6   6   0 5536.83 1404.60   3
  -6  -6   1 92571.8 8461.53   4
  -6   6  -1 93449.0 6153.23   3
  -6  -6   2 7012.90 2229.00   4
  -6   6  -2 7909.61 1721.07   3
  -6  -6   3 65680.7 7073.20   4
   6   7  -9 19318.2 5792.68   2
   6   7  -8 199.172 1333.18   2
  -6  -7  -7 14499.1 3862.25   4
   6   7  -7 17195.6 4506.33   2
  -6  -7  -6 76448.0 8094.21   4
   6   7  -6 123377. 11994.6   2
  -6  -7  -5 13686.0 3401.99   4
  -6   7   5 12584.0 2170.23   3
  -6  -7  -4 3633.94 1553.74   4
   6   7  -4 6452.57 2352.26   2
  -6   7   4 2156.05 963.627   3
  -6  -7  -3 19429.6 4271.69   4
  -6   7   3 15282.6 2438.36   3
   6   7  -3 25955.0 4895.28   2
  -6  -7  -2 134761. 11550.2   4
  -6   7   2 117983. 6939.35   3
  -6  -7  -1 17408.6 4291.81   4
  -6   7   1 16736.4 2597.07   3
  -6  -7   0 4159.04 2030.97   4
  -6   7   0 2708.06 1162.72   3
  -6  -7   1 22314.0 4529.23   4
  -6   7  -1 20267.9 2989.66   3
  -6   7  -2 119438. 7547.70   3
  -6  -7   2 125886. 10840.0   4
  -6   7  -3 20006.0 3319.36   3
  -6  -7   3 17767.0 4110.64   4
   6   8  -8 41761.2 7840.92   2
  -6  -8  -7 19890.2 4589.65   4
   6   8  -7 28204.7 5929.92   2
  -6  -8  -6 5626.57 2317.26   4
   6   8  -6 7152.61 2875.48   2
  -6  -8  -5 36276.2 6141.45   4
  -6   8   5 24545.3 3281.04   3
  -6  -8  -4 56211.7 7829.91   4
  -6   8   4 46454.2 4556.40   3
  -6  -8  -3 41083.1 6831.03   4
  -6   8   3 37424.4 4190.25   3
   6   8  -3 50060.2 7076.82   2
  -6  -8  -2 5929.16 2713.33   4
  -6   8   2 5713.00 1606.62   3
  -6  -8  -1 33653.8 6465.06   4
  -6   8   1 30342.3 3662.02   3
  -6  -8   0 44992.1 7175.56   4
  -6   8   0 42090.4 4444.93   3
  -6  -8   1 29916.9 5676.07   4
  -6   8  -1 25872.1 3554.02   3
  -6  -8   2 7920.29 2903.69   4
  -6   8  -2 8336.62 2072.35   3
  -6   8  -3 37344.0 4725.51   3
  -6  -8   3 45297.5 7097.09   4
  -6  -8   4 74360.2 9231.68   4
  -6  -9  -7 15923.4 4359.30   4
  -6  -9  -6 22642.4 5161.86   4
   6   9  -6 30667.1 6497.07   2
  -6   9   6 16814.7 2837.38   3
  -6  -9  -5 40030.3 6960.13   4
  -6   9   5 30189.3 3956.23   3
  -6  -9  -4 11353.6 3719.64   4
  -6   9   4 10010.7 2217.78   3
   6   9  -4 16660.1 4413.25   2
  -6  -9  -3 47257.3 7958.89   4
  -6   9   3 40672.9 4636.17   3
   6   9  -3 62140.1 8269.96   2
  -6  -9  -2 27623.9 6171.31   4
  -6   9   2 24266.7 3478.47   3
  -6  -9  -1 34155.5 7029.13   4
  -6   9   1 26372.2 3712.66   3
  -6  -9   0-96.9919 653.218   4
  -6   9   0-271.937 433.185   3
  -6  -9   1 30331.5 6377.03   4
  -6   9  -1 27464.5 3797.01   3
  -6  -9   2 26366.7 5804.89   4
  -6   9  -2 21706.6 3511.71   3
  -6   9  -3 46326.8 5453.90   3
  -6  -9   3 52633.0 8337.44   4
  -6  -9   4 14542.7 4280.24   4
  -6 -10  -5 3831.27 2802.08   4
  -6  10   5 1923.28 840.977   3
  -6 -10  -4 87277.3 11194.2   4
  -6  10   4 73303.7 6568.30   3
  -6 -10  -3 2957.40 2033.33   4
  -6  10   3 3160.63 1302.82   3
   6  10  -3 6441.65 2905.75   2
  -6 -10  -2-644.624 1298.57   4
  -6  10   2 1781.10 790.398   3
  -6 -10  -1 3113.25 1881.70   4
  -6  10   1 4189.77 1622.18   3
  -6 -10   0 62548.1 9831.08   4
  -6  10   0 57821.8 5763.38   3
  -6 -10   1 2701.82 2302.89   4
  -6  10  -1 3851.18 1416.80   3
  -6 -10   2 1830.53 2153.71   4
  -6  10  -2 716.578 414.829   3
  -6 -10   3 5926.42 2953.92   4
  -6  10  -3 4180.28 1791.11   3
  -6 -10   4 92084.8 12162.2   4
  -6 -11  -2 2191.68 2471.25   4
  -6 -11  -1 44286.9 9198.12   4
  -6 -11   0 10699.4 4472.87   4
  -6 -11   1 52327.5 9709.42   4
  -6 -11   2 707.415 1341.60   4
  -6 -11   3 33600.0 7884.69   4
  -6 -11   4 1762.38 1946.71   4
  -6 -11   5 39533.8 8511.54   4
   7   0   0 772.220 1032.85   1
   7   0   0 81.6079 744.734   2
   7   0   1 10794.9 3325.45   1
   7   0  -1 3572.76 1674.85   2
   7   0  -1 8921.15 2791.43   1
   7   0   1 4550.29 1618.38   2
   7   0  -2 127969. 12254.8   2
   7   0   2 97510.5 7523.64   2
   7   0  -3 14922.4 4756.76   2
   7   0   3 9170.62 2127.73   2
   7   0  -3 15534.9 3652.42   1
   7   0  -4-117.650 316.438   1
   7   0  -4-259.928 1772.28   2
   7   0   4-228.111 118.889   1
   7   0  -5 12276.3 4193.16   2
   7   0  -5 11325.9 3103.60   1
   7   0   6 193598. 13993.0   1
   7   0  -6 169267. 16836.8   2
   7   0  -7 3597.56 2810.89   2
   7   0   7 3185.31 1790.58   1
   7   0  -8 411.041 3457.26   2
   7   0   8 2465.08 1426.57   1
   7   0  -9 18985.4 5836.08   2
   7   0   9 9625.08 2945.06   1
   7   0 -10 152614. 15585.7   2
   7   0  10 95109.6 9545.49   1
   7   0  11 4611.50 2132.47   1
   7   0 -11 9552.32 4360.23   2
   7   0  12-385.099 1025.98   1
   7  -1  12 18849.4 5165.48   1
   7   1 -11 77700.5 11772.3   2
   7  -1  11 46648.5 7584.51   1
   7   1 -10 14166.8 4725.18   2
   7  -1  10 6722.67 2402.86   1
   7   1  -9 101143. 13766.3   2
   7  -1   9 64026.8 8314.17   1
   7   1  -8 11434.5 4893.74   2
   7  -1   8 7948.42 2896.59   1
   7   1  -7 52339.8 9459.88   2
   7  -1   7 64267.1 8148.67   1
   7   1  -6 10647.5 2695.21   1
   7   1  -6 15178.6 5275.39   2
   7  -1   6 18837.9 4284.77   1
   7   1  -5 50717.3 6280.46   1
   7   1  -5 77146.6 11029.8   2
   7  -1   5 81545.6 8980.65   1
   7  -1   4 11032.2 3407.95   1
   7   1  -4 5401.91 2703.47   2
   7   1  -4 9459.20 2974.33   1
   7   1  -3 69196.2 8157.35   1
   7  -1   3 97609.1 9884.40   1
   7   1  -3 72816.5 9571.03   2
   7  -1   2 26224.6 5006.36   1
   7   1  -2 16641.0 4232.29   2
   7  -1   1 36176.4 5151.64   2
   7   1  -1 75754.6 8081.66   2
   7  -1   0 21580.5 4599.08   1
   7   1   0 18337.8 3943.16   2
   7  -1  -1 34918.0 5960.33   2
   7   1   1 68575.3 6931.08   2
   7  -1  -2 9201.13 3326.45   2
   7  -1  -2 26054.3 5083.17   1
   7  -1  -3 34787.0 6810.74   2
   7  -1  -3 72558.8 8717.72   1
   7  -1  -4 7918.91 3168.55   2
   7  -1  -4 7959.05 2900.49   1
   7  -1  -5 74251.2 8885.46   1
   7  -1  -5 68787.1 9891.80   2
   7  -1  -6 6873.82 2724.58   2
   7  -1  -7 62810.5 9701.92   2
   7   1   8 11757.7 3400.87   1
   7  -1  -8 12541.7 4152.64   2
   7  -1  -9 67302.7 10046.7   2
   7   1   9 56734.7 7476.01   1
   7   1  10 7070.50 2396.45   1
   7  -1 -10 9935.12 4261.40   2
   7  -1 -11 59578.6 9911.18   2
   7   1  11 28503.1 5013.91   1
   7   1  12 8657.84 2736.79   1
   7  -2  11 28038.7 6410.95   1
   7   2 -11 27386.4 7117.80   2
   7   2 -10 114218. 15379.9   2
   7  -2  10 93306.2 11712.0   1
   7   2  -9 16492.9 5771.60   2
   7  -2   9 18547.7 5371.24   1
   7   2  -8 2246.86 1402.15   2
   7  -2   8 2257.90 1887.77   1
   7   2  -7 21966.1 6472.79   2
   7  -2   7 36775.0 6941.38   1
   7   2  -6 78224.3 7967.49   1
   7   2  -6 106043. 13253.6   2
   7   2  -5 47250.9 8995.93   2
   7  -2   5 58741.0 8352.26   1
   7   2  -4 7944.83 3342.24   2
   7  -2   4 12980.0 4030.85   1
   7   2  -3 31816.0 5908.94   2
  -7   2   3 27418.4 2557.50   3
   7  -2   3 40482.8 6891.94   1
  -7   2   2 117344. 5396.19   3
   7   2  -2 117257. 10685.8   2
  -7   2   1 22251.1 2389.96   3
   7   2  -1 20388.5 4255.13   2
   7  -2   1 26604.1 5569.97   1
   7  -2   0 563.144 104.880   2
   7  -2   0 1297.74 1036.34   1
   7   2   0 1343.38 1191.41   2
   7  -2  -1 22425.9 3931.37   2
   7  -2  -1 40000.4 7207.60   1
   7  -2  -2 94436.6 8758.94   2
   7  -2  -2 161864. 14786.5   1
   7  -2  -3 28443.0 5024.99   2
   7  -2  -3 41428.3 7311.08   1
   7  -2  -4 4849.13 1794.82   2
   7  -2  -5 31889.4 5887.98   2
   7  -2  -6 91806.6 10547.1   2
   7  -2  -7 18053.6 4766.54   2
   7  -2  -8 3960.97 2896.28   2
   7  -2  -9 16614.7 5258.25   2
   7   2  10 59291.7 7342.35   1
   7  -2 -10 80182.7 11408.4   2
   7   2  11 19515.5 4314.28   1
   7  -2 -11 33978.0 7682.79   2
   7   2  12 3164.83 1461.25   1
   7   3 -10 1760.76 1918.67   2
   7   3  -9 29954.7 7547.61   2
   7  -3   8 90364.0 11791.9   1
   7   3  -8 75175.0 11830.4   2
   7  -3   7 38588.2 7739.73   1
   7   3  -7 30962.6 7355.99   2
   7   3  -6 2760.61 2368.27   2
   7  -3   6 7286.08 3423.07   1
   7  -3   5 77616.1 11260.3   1
   7   3  -5 57684.3 9160.28   2
   7   3  -4 125343. 12161.9   2
  -7   3   4 104211. 5269.87   3
   7   3  -3 66039.9 8360.94   2
  -7   3   3 54495.1 3902.82   3
   7  -3   2 4496.52 2620.98   1
   7   3  -2 1908.83 1702.82   2
  -7   3   2 2998.11 846.995   3
   7  -3   1 35871.3 7446.86   1
  -7  -3  -1 25167.1 3184.01   4
  -7   3   1 25769.1 2782.69   3
   7   3  -1 22860.2 4674.48   2
  -7  -3   0 56169.0 4481.76   4
  -7   3   0 62570.4 4588.72   3
   7   3   0 56715.2 6878.47   2
  -7  -3   1 23113.2 2989.96   4
   7  -3  -2 3227.06 1670.73   2
   7  -3  -3 55166.4 6469.71   2
   7  -3  -4 136064. 11280.5   2
   7  -3  -5 52701.9 7490.08   2
   7  -3  -6 4756.03 2565.21   2
   7  -3  -7 34645.1 6687.57   2
   7  -3  -8 61160.5 9599.89   2
   7  -3  -9 19340.0 5879.18   2
   7  -3 -10 2442.39 2180.01   2
   7  -3 -11 20249.7 6496.80   2
   7   3  12 33176.6 5539.73   1
   7   4 -10 14312.2 5402.81   2
   7   4  -9 49434.4 10132.2   2
   7   4  -8 14625.6 5174.53   2
   7   4  -7 73645.3 11049.2   2
   7   4  -6 30948.1 6933.64   2
   7   4  -5 64669.7 9088.09   2
  -7   4   5 38351.4 3348.02   3
  -7   4   4 11862.9 1908.54   3
   7   4  -4 21026.6 4905.81   2
  -7  -4  -3 67744.8 6223.02   4
  -7   4   3 67689.2 4687.08   3
  -7  -4  -2 17611.8 2899.12   4
  -7   4   2 19193.2 2428.90   3
   7   4  -2 26499.6 5365.17   2
  -7  -4  -1 61688.9 5544.82   4
  -7   4   1 65277.1 4666.40   3
   7   4  -1 68358.7 7802.58   2
  -7  -4   0 14916.0 2780.97   4
  -7   4   0 15962.3 2332.51   3
  -7  -4   1 62234.9 5829.02   4
  -7   4  -1 65973.7 5298.93   3
   7  -4  -3 91494.9 8195.64   2
   7  -4  -4 18200.5 4041.46   2
   7  -4  -5 74513.2 8711.72   2
   7  -4  -6 22859.9 5216.45   2
   7  -4  -7 58916.9 8990.39   2
   7  -4  -8 12905.7 4395.09   2
   7  -4  -9 39918.8 8424.39   2
   7  -4 -10 16960.8 5736.60   2
   7  -4 -11 38088.6 8749.76   2
   7   5  -9 7529.78 3829.75   2
   7   5  -8 148042. 16677.9   2
   7   5  -7 16257.3 5224.07   2
   7   5  -6 4295.02 2847.03   2
   7   5  -5 7373.87 2790.38   2
  -7   5   5 3211.20 979.888   3
  -7  -5  -4 107103. 8505.54   4
  -7   5   4 91915.7 5631.13   3
  -7  -5  -3 6471.39 1963.63   4
   7   5  -3 7484.05 3168.01   2
  -7   5   3 5772.27 1417.85   3
  -7  -5  -2 1166.84 773.605   4
  -7   5   2 572.818 401.328   3
   7   5  -2-202.480 582.911   2
  -7  -5  -1 14747.7 3031.43   4
  -7   5   1 18111.7 2560.24   3
   7   5  -1 22510.2 4596.33   2
  -7  -5   0 170018. 10647.9   4
  -7   5   0 163586. 7998.39   3
  -7  -5   1 13938.5 3057.86   4
  -7   5  -1 15681.9 2538.04   3
  -7  -5   2 1082.06 764.113   4
   7   6  -9 64350.1 10700.8   2
   7   6  -8 20984.4 5974.00   2
   7   6  -7 88690.8 11919.9   2
   7   6  -6 9546.80 3561.81   2
  -7  -6  -5 39117.9 5662.30   4
   7   6  -5 48435.0 7749.01   2
  -7   6   5 29678.5 3427.09   3
  -7  -6  -4 2793.47 1286.17   4
   7   6  -4 4327.55 2219.91   2
  -7   6   4 2192.44 861.684   3
  -7  -6  -3 43132.8 5712.58   4
  -7   6   3 42548.3 4167.80   3
  -7  -6  -2 3010.22 1431.59   4
  -7   6   2 2102.65 890.030   3
   7   6  -2 4463.76 2074.47   2
  -7  -6  -1 68227.4 7364.93   4
  -7   6   1 60465.3 4984.59   3
  -7  -6   0 23225.4 4335.45   4
  -7   6   0 21593.6 3041.59   3
  -7  -6   1 77551.2 8335.19   4
  -7   6  -1 63389.6 5291.97   3
  -7  -6   2 3228.87 1795.99   4
  -7   6  -2 2514.56 916.439   3
   7   7  -7 16486.2 5091.44   2
  -7  -7  -6 4359.47 1993.10   4
   7   7  -6 5294.04 2295.27   2
  -7   7   6 1646.28 804.119   3
  -7  -7  -5 6964.43 2453.27   4
  -7   7   5 3815.85 1194.39   3
  -7  -7  -4 58259.3 7071.11   4
  -7   7   4 59325.6 5142.31   3
  -7  -7  -3 10202.3 3033.16   4
  -7   7   3 9861.82 2083.67   3
   7   7  -3 13473.0 3785.86   2
  -7  -7  -2 2599.67 1656.17   4
  -7   7   2 3084.16 1139.76   3
   7   7  -2 3672.92 2262.03   2
  -7  -7  -1 20606.7 4487.22   4
  -7   7   1 18567.0 2878.24   3
  -7  -7   0 121607. 11467.4   4
  -7   7   0 105835. 7015.33   3
  -7  -7   1 14837.7 3718.00   4
  -7   7  -1 15428.7 2752.75   3
  -7  -7   2 3859.67 1737.15   4
  -7   7  -2 3941.72 1419.69   3
  -7   8   7 9972.61 2158.50   3
  -7  -8  -6 31527.3 5742.98   4
   7   8  -6 41959.5 7787.92   2
  -7   8   6 20853.9 3154.36   3
  -7  -8  -5 20814.6 4546.80   4
  -7   8   5 15380.0 2774.93   3
  -7  -8  -4 4855.35 2172.76   4
  -7   8   4 2826.55 1054.85   3
   7   8  -4 5362.45 2636.36   2
  -7  -8  -3 19648.1 4595.06   4
  -7   8   3 20765.3 3187.05   3
   7   8  -3 26802.5 5664.68   2
  -7  -8  -2 42298.3 6905.39   4
  -7   8   2 37636.4 4244.33   3
   7   8  -2 54372.5 8077.66   2
  -7  -8  -1 27964.1 5667.98   4
  -7   8   1 21361.3 3238.05   3
  -7  -8   0 2628.50 2087.48   4
  -7   8   0 1803.50 970.512   3
  -7  -8   1 23546.5 5233.51   4
  -7   8  -1 21222.9 3245.00   3
  -7  -8   2 37124.6 6489.10   4
  -7   8  -2 39193.8 4861.74   3
  -7  -8   3 25504.3 5437.72   4
  -7  -9  -6 4610.93 2185.34   4
  -7   9   6 3934.97 1422.36   3
  -7  -9  -5 24229.0 5236.10   4
  -7   9   5 19381.4 3229.28   3
  -7  -9  -4 19061.3 4833.21   4
  -7   9   4 18554.7 3203.59   3
   7   9  -4 31406.7 6562.12   2
  -7  -9  -3 30736.6 6273.47   4
  -7   9   3 22700.9 3597.58   3
  -7  -9  -2 8513.60 3366.95   4
  -7   9   2 6802.08 1731.72   3
   7   9  -2 10644.5 3332.22   2
  -7  -9  -1 31097.4 6390.60   4
  -7   9   1 26973.6 3856.09   3
  -7  -9   0 21101.5 5710.18   4
  -7   9   0 17761.6 3158.62   3
  -7  -9   1 29705.2 6329.02   4
  -7   9  -1 26032.1 3793.39   3
  -7  -9   2 7425.71 3091.07   4
  -7   9  -2 7306.22 2099.66   3
  -7  -9   3 33689.1 6809.16   4
  -7 -10  -3 4513.14 2585.36   4
  -7  10   3 3750.32 1316.33   3
  -7 -10  -2 58625.9 9590.19   4
  -7  10   2 46648.4 5251.46   3
  -7 -10  -1 3075.98 2156.64   4
  -7  10   1 3154.11 1365.36   3
  -7 -10   0 1655.81 1098.34   4
  -7  10   0 700.386 407.182   3
  -7 -10   1 3258.04 2202.11   4
  -7  10  -1 3120.74 1264.36   3
  -7 -10   2 65114.6 10064.3   4
  -7  10  -2 62805.4 6535.45   3
  -7 -10   3 5229.30 2922.38   4
   8   0   0 191047. 14894.8   1
   8   0   0 77960.5 9100.32   2
   8   0  -1 8259.84 2959.20   2
   8   0   1 20209.0 4787.52   1
   8   0  -1 15973.3 4263.50   1
   8   0  -2-508.692 980.661   2
   8   0   2 56.8303 394.614   1
   8   0  -2-341.934 1632.92   1
   8   0  -3 2567.42 1371.14   1
   8   0  -3 2164.94 1812.65   2
   8   0   3 3275.48 1407.36   1
   8   0  -4 59115.7 9645.88   2
   8   0  -4 75696.3 9205.12   1
   8   0  -5 1548.58 2125.10   2
   8   0   5 822.029 512.838   1
   8   0  -5 839.829 618.126   1
   8   0   6 796.554 829.395   1
   8   0  -6-170.627 833.426   1
   8   0  -7 10533.6 4609.45   2
   8   0   7 8809.25 3049.63   1
   8   0  -8 154950. 16637.3   2
   8   0   8 113248. 11153.2   1
   8   0  -9 17196.8 5456.40   2
   8   0   9 12394.0 3593.76   1
   8   0  10 825.140 608.485   1
   8   0 -10 155.157 1371.94   2
   8  -1  10 7398.69 3036.03   1
   8   1 -10 2484.95 351.132   2
   8   1  -9 63449.6 11189.4   2
   8  -1   9 52075.3 8043.40   1
   8   1  -8 25640.2 7511.21   2
   8  -1   8 15420.2 4447.31   1
   8   1  -7 47116.8 9619.16   2
   8  -1   7 64131.1 8911.90   1
   8   1  -6 5194.76 3243.53   2
   8  -1   6 13046.0 3995.02   1
   8   1  -6 4769.46 2036.59   1
   8   1  -5 35697.4 7730.67   2
   8   1  -5 29458.7 5292.17   1
   8  -1   4 9162.00 3397.33   1
   8   1  -4 7437.99 3471.89   2
   8   1  -4 5890.71 2141.03   1
   8   1  -3 35918.7 6224.79   1
   8   1  -3 38094.9 7391.41   2
   8  -1   3 49560.6 7689.76   1
   8  -1   2 16400.4 4510.03   1
   8   1  -2 11869.1 3892.40   1
   8   1  -2 8507.84 3591.84   2
   8   1  -1 60783.3 8556.50   1
   8   1  -1 39906.0 6656.84   2
   8  -1   1 69417.1 9276.55   1
   8   1   0 15520.9 4165.08   1
   8  -1   0 19523.7 4967.24   1
   8   1   0 11511.8 3265.02   2
   8  -1  -1 64450.3 9178.32   1
   8   1   1 35039.4 5640.39   2
   8  -1  -2 2000.45 1627.71   2
   8  -1  -2 11172.5 3727.46   1
   8   1   2 6600.31 2312.59   2
   8  -1  -3 30366.1 6534.84   2
   8  -1  -3 55381.6 8854.46   1
   8  -1  -4 5467.20 2507.03   2
   8  -1  -4 8809.11 3293.59   1
   8   1   4 10393.9 3247.62   1
   8   1   5 43056.8 6898.36   1
   8  -1  -5 24440.8 5947.37   2
   8  -1  -5 29990.2 6352.19   1
   8  -1  -6 5541.21 2382.57   2
   8   1   6 8929.36 3221.70   1
   8   1   7 53085.9 7898.13   1
   8  -1  -7 41209.6 7707.10   2
   8   1   8 18492.4 4552.84   1
   8  -1  -8 17816.6 4989.09   2
   8  -1  -9 51842.5 9203.10   2
   8   1   9 42648.7 6519.67   1
   8   1  10 3561.52 1948.78   1
   8  -1 -10 9773.67 4028.40   2
   8  -1 -11 32617.1 7599.03   2
   8   2 -10 2712.76 3011.12   2
   8  -2  10 1514.27 924.583   1
   8   2  -9 17589.8 6339.98   2
   8  -2   9 21671.4 6001.84   1
   8   2  -8 74032.0 12179.2   2
   8  -2   8 92812.9 12186.4   1
   8   2  -7 24274.8 7213.39   2
   8  -2   7 33246.4 7380.49   1
   8  -2   6 9684.37 3573.52   1
   8   2  -6 6513.95 4147.82   2
   8   2  -6 3579.73 1693.64   1
   8   2  -5 21409.1 5876.42   2
   8   2  -5 19232.7 4542.80   1
   8  -2   5 34744.5 7027.09   1
   8   2  -4 69780.5 8722.75   1
   8   2  -4 95911.4 12318.9   2
   8   2  -3 18468.1 5119.56   2
   8  -2   3 35801.2 7157.24   1
   8   2  -2 5535.08 2680.54   2
   8  -2   2 7262.34 3383.36   1
   8   2  -1 23714.1 4962.30   2
   8  -2   1 42608.0 8359.06   1
   8   2   0 58113.2 7736.03   2
   8  -2   0 114531. 13854.9   1
   8   2   1 16133.0 3817.00   2
   8  -2  -1 35087.0 7391.36   1
   8  -2  -2 11742.1 4367.59   1
   8   2   2 5407.62 2070.21   2
   8  -2  -3 22810.3 6002.53   1
   8  -2  -4 74180.3 8771.74   2
   8  -2  -5 17880.2 4467.20   2
   8  -2  -6 5187.15 2334.51   2
   8  -2  -7 18192.7 4941.71   2
   8  -2  -8 52261.9 8787.47   2
   8   2   9 14438.1 4003.26   1
   8  -2  -9 11510.0 4348.37   2
   8   2  10 948.308 1157.64   1
   8  -2 -10 1326.62 865.795   2
   8  -2 -11 8674.86 4313.98   2
   8   3  -9 11873.7 5316.04   2
   8   3  -8 147.567 1619.13   2
   8  -3   8 301.369 2180.56   1
   8  -3   7 37467.4 8087.88   1
   8   3  -7 26781.9 7553.48   2
   8   3  -6 64342.0 10586.0   2
   8   3  -6 44795.2 6613.41   1
   8  -3   5 44963.7 9293.05   1
   8   3  -5 30333.8 7322.15   2
   8   3  -4 7518.08 2944.74   2
   8  -3   4 11496.4 4535.31   1
   8  -3   3 46833.5 9400.97   1
   8   3  -3 28870.3 6008.71   2
   8  -3   2 119031. 15193.7   1
   8   3  -2 55637.9 8004.87   2
   8  -3   1 45925.5 9163.64   1
   8   3  -1 18951.6 4543.55   2
   8   3   0 5020.33 2383.70   2
   8   3   1 20439.5 4369.03   2
   8  -3  -7 28287.8 6347.44   2
   8  -3  -8 2681.11 2151.28   2
   8  -3  -9 11975.4 4929.67   2
   8  -3 -10 44082.1 9217.70   2
   8  -3 -11 11965.2 4911.38   2
   8   4  -9 37034.5 8645.22   2
   8   4  -8 12227.3 5253.26   2
   8   4  -7 44175.9 9196.88   2
   8   4  -6 11763.4 4842.99   2
   8   4  -5 60924.6 10032.4   2
   8   4  -4 18635.5 5088.61   2
   8   4  -3 56669.2 8482.43   2
   8   4  -2 16404.0 4589.34   2
   8   4  -1 44648.6 7085.49   2
   8   4   0 16910.1 4047.14   2
   8   5  -8 2175.46 1190.19   2
   8   5  -7 5184.11 2719.67   2
   8   5  -6 127473. 15283.3   2
   8   5  -5 4181.06 2667.09   2
   8   5  -4 316.715 1284.48   2
   8   5  -3 12568.9 4513.54   2
   8   5  -2 101651. 11314.9   2
  -8   5   1 5280.66 1526.46   3
   8   5  -1 5601.78 2272.85   2
  -8   5   0 1461.42 99.9915   3
   8   5   0 2560.95 1441.40   2
   8   6  -7 50151.4 9867.54   2
   8   6  -6 12622.9 4273.47   2
   8   6  -5 55239.9 9030.78   2
  -8  -6  -4 1996.58 1223.23   4
   8   6  -4 2917.85 2042.10   2
  -8  -6  -3 34103.0 4902.46   4
  -8   6   3 36590.5 3971.11   3
   8   6  -3 46644.3 8120.80   2
  -8   6   2 11971.8 2261.43   3
   8   6  -2 14705.3 4410.09   2
  -8   6   1 38006.9 4133.00   3
   8   6  -1 44420.5 7221.52   2
  -8   6   0 3546.82 1241.17   3
  -8   6  -1 46809.7 5047.67   3
   8   7  -6 56838.9 9604.18   2
   8   7  -5 16831.1 4965.31   2
  -8   7   5 11433.8 2377.96   3
  -8  -7  -4 5915.20 2327.57   4
   8   7  -4 6624.46 2560.42   2
  -8   7   4 2719.16 1114.69   3
  -8  -7  -3 10287.3 2909.59   4
  -8   7   3 10348.0 2203.15   3
   8   7  -3 14557.2 4469.82   2
  -8   7   2 58775.0 5314.47   3
   8   7  -2 81898.7 10364.2   2
  -8   7   1 7558.28 1945.39   3
   8   7  -1 11554.8 3823.62   2
  -8   7   0 1437.10 464.716   3
  -8   7  -1 8183.80 2185.07   3
  -8   8   6 3676.73 1442.51   3
  -8  -8  -5 16863.3 4173.95   4
  -8   8   5 15263.4 2903.22   3
  -8  -8  -4 24554.5 4783.80   4
  -8   8   4 26673.6 3840.37   3
  -8  -8  -3 15201.7 4004.02   4
  -8   8   3 18496.4 3115.47   3
  -8   8   2 5560.36 1743.84   3
   8   8  -2 10505.5 3964.79   2
  -8   8   1 18741.3 3092.09   3
   8   8  -1 25339.9 5993.60   2
  -8   8   0 26265.4 3829.32   3
  -8   8  -1 14102.0 2827.10   3
  -8  -9  -4 7553.01 2945.86   4
  -8   9   4 6734.82 1935.34   3
  -8  -9  -3 23627.3 5153.49   4
  -8   9   3 23706.3 3738.14   3
  -8   9   2 15255.7 3006.59   3
  -8   9   1 14661.1 2888.30   3
  -8   9   0 1175.16 779.185   3
  -8   9  -1 18516.9 3455.81   3
  -8   9  -2 17067.2 3411.45   3
   9   0   0 2433.33 1583.36   1
   9   0  -1 4416.40 2194.49   1
   9   0   1 4334.81 2392.03   1
   9   0   2 97477.0 11629.6   1
   9   0  -2 84658.6 11146.4   1
   9   0  -3 5459.52 2759.36   1
   9   0   3 9968.02 3729.27   1
   9   0  -4-2588.84 1894.17   1
   9   0   4-487.649 1095.69   1
   9   0  -5 6177.26 2919.14   1
   9   0   5 7369.07 3137.63   1
   9   0  -6 62498.6 10807.5   2
   9   0   6 77049.0 10059.8   1
   9   0  -7 470.537 1897.39   2
   9   0   7 2091.84 1488.49   1
   9   0  -8 392.530 240.486   2
   9   0  -9 8172.07 3784.61   2
   9   1  -9 32808.3 8181.10   2
   9   1  -8 6540.70 3786.13   2
   9   1  -7 27612.5 7719.18   2
   9  -1   7 34732.7 7215.08   1
   9   1  -6 6709.56 3355.95   2
   9  -1   6 18747.8 5237.10   1
   9   1  -5 25606.3 6718.94   2
   9   1  -5 22463.7 5332.00   1
   9   1  -4 4167.63 2190.99   1
   9   1  -4 2549.40 1831.39   2
   9   1  -3 28829.6 6204.44   1
   9   1  -3 24489.7 6423.45   2
   9  -1   2 22004.7 5838.79   1
   9   1  -2 13604.0 4188.90   1
   9   1  -1 34541.1 6976.24   1
   9  -1   1 50576.1 8822.49   1
   9   1   0 8598.29 3515.40   1
   9  -1   0 6420.25 3408.39   1
   9   1   1 38935.9 7540.14   1
   9  -1  -1 45167.9 8326.44   1
   9  -1  -2 17149.1 5337.90   1
   9   1   2 15248.8 4497.62   1
   9   1   3 44662.4 8078.72   1
   9  -1  -3 37883.6 8222.11   1
   9  -1  -4 5596.52 3023.62   1
   9   1   4 5877.94 2704.01   1
   9   1   5 47117.9 8236.18   1
   9   1   6 13043.4 3876.64   1
   9   1   7 34059.1 6500.75   1
   9  -1  -9 23672.2 6312.94   2
   9  -1 -10 9240.84 4057.55   2
   9   2  -9 13899.3 6356.24   2
   9   2  -8 3290.38 2376.54   2
   9   2  -7 9609.35 4581.93   2
   9  -2   7 13302.9 4824.60   1
   9   2  -6 42182.2 9134.43   2
   9  -2   6 78519.6 12161.5   1
   9   2  -5 12358.9 5003.71   2
   9  -2   5 23404.2 6385.29   1
   9   2  -5 11773.6 3659.98   1
   9   2  -4 5353.76 2784.49   2
   9   2  -4 5006.70 2424.08   1
   9   2  -3 11156.0 3976.66   1
   9   2  -3 10595.1 4177.56   2
   9   2  -2 57647.8 9222.15   1
   9   2  -2 52631.3 8990.08   2
   9  -2   1 23275.1 6591.33   1
   9   2  -1 6954.58 2913.29   2
   9  -2   0-715.099 1859.44   1
   9  -2  -1 22676.1 6699.43   1
   9  -2  -2 64102.4 11300.8   1
   9   2   6 59867.6 8902.17   1
   9   2   7 9414.71 3404.75   1
   9   3  -8 34594.4 8338.59   2
   9   3  -7 21186.1 7110.51   2
   9   3  -6 5787.24 3320.77   2
   9  -3   6 6578.96 3013.46   1
   9   3  -5 17266.2 4740.14   1
   9  -3   5 30641.4 7903.17   1
   9   3  -5 26789.6 7349.76   2
   9  -3   4 84239.8 13595.3   1
   9   3  -4 40611.1 8332.66   2
   9   3  -3 20665.8 5812.60   2
   9  -3   3 37972.2 8982.68   1
   9   3  -2 2505.64 1667.29   2
   9  -3   2 7867.91 4270.21   1
   9  -3   1 38464.5 9108.06   1
   9   3  -1 15499.8 4501.18   2
   9   3   0 25551.9 5599.31   2
   9   4  -7 31845.0 8457.87   2
   9   4  -6 20148.6 6371.69   2
   9   4  -5 38343.1 8735.70   2
   9   4  -4 12196.9 4404.05   2
   9   4  -3 26453.8 6250.05   2
   9   4  -2 9316.03 3538.73   2
   9   4  -1 25388.5 6009.74   2
   9   4   0 6678.84 3243.76   2
   9   4   1 16392.6 4345.66   2
   9   4   2 8662.62 3099.06   2
   9   5  -6 2095.93 2121.01   2
   9   5  -5 1793.90 1471.51   2
   9   5  -4 68022.2 10528.7   2
   9   5  -3 5491.08 2795.84   2
   9   5  -2 108.932 1754.41   2
   9   5  -1 8454.80 3131.68   2
   9   5   0 64657.2 9235.06   2
   9   5   1 9751.07 3624.46   2
   9   6  -5 27543.9 6960.29   2
   9   6  -4 6943.67 3539.44   2
   9   6  -3 37350.2 7693.06   2
   9   6  -2 3158.83 2327.45   2
   9   6  -1 39827.4 7575.35   2
   9   6   0 13047.1 4162.74   2
   9   7  -3 7685.37 3302.96   2
   9   7  -2 3131.15 2044.51   2
   9   7  -1 9728.53 3549.27   2
   9   7   0 58189.7 9100.82   2
  10   0   0 70455.9 11223.2   1
  10   0   1 12750.5 4527.78   1
  10   0  -1 11662.3 4333.23   1
  10   0   2 2258.42 2204.44   1
  10   0  -2-581.346 1015.45   1
  10   0   3 2196.30 1609.39   1
  10   0  -3 458.825 1042.05   1
  10   0  -4 31586.9 7679.38   1
  10   1  -4 3666.70 2161.91   1
  10   1  -3 17065.5 5227.63   1
  10  -1   3 32888.9 7811.47   1
  10   1  -2 6380.21 3156.09   1
  10  -1   2 9701.49 3973.29   1
  10  -1   1 34216.6 8041.99   1
  10   1  -1 29376.1 6696.11   1
  10  -1   0 22680.5 6371.34   1
  10   1   0 17551.0 5066.90   1
  10  -1  -1 32549.0 8283.89   1
  10   1   1 30546.4 6697.49   1
  10  -1  -2 6673.43 4183.13   1
  10   1   2 1891.19 1708.65   1
  10  -1  -3 21262.7 6499.71   1
  10   1   3 26406.1 6387.20   1
  10  -1  -4 5366.01 2870.41   1
  10   2  -4 16578.9 4782.78   1
  10   2  -3 4935.43 2559.32   1
  10  -2   3 13201.7 5897.30   1
  10   2  -2 784.875 609.532   1
  10  -2   2 3706.49 2817.86   1
  10  -2   1 21268.0 7010.32   1
  10   2  -1 12372.4 4203.28   1
  10   2   0 27027.7 6686.69   1
  10  -2   0 47929.0 10575.2   1
  10  -2  -1 13746.0 5825.03   1
  10   2   1 13921.7 4768.50   1
  10   2   2 2947.01 2069.41   1
  10   2   3 10103.0 3789.45   1
  10   3  -7 11379.5 5431.93   2
  10   3  -4 4244.93 2509.23   1
  10   3  -3 5971.64 2776.43   1
  10   3  -2 22524.5 6122.73   1
  10   4  -6 6695.24 3908.84   2
  10   4  -5 23124.2 7005.41   2
  10   4  -4 5513.95 3228.34   2
  10   5  -4 128.786 1321.41   2
  10   5  -3 2896.88 2454.39   2
  10   6  -2 8903.39 4166.43   2
  10   6  -1 20126.6 5940.30   2
  11   0  -3 3697.58 2866.31   1
  11   1  -3 15247.6 5179.12   1
  11  -1  -3 13886.9 5758.34   1
;
_shelx_hkl_checksum   40108
